# Supplementary material for: Tri- and di-fluoroethylation of alkenes by visible light photoredox catalysis
Source: Royal Society of Chemistry journal article supplement (doi:10.1039/c8qo00082d), 2018-01-01

# Supporting Information

## Tri- and difluoroethylation of alkenes by visible light photoredox catalysis

Xiao-Yang Pan,<sup>ab</sup> Yue Zhao,<sup>ab</sup> Hong-An Qu,<sup>c</sup> Jin-Hong Lin,<sup>b\*</sup> Xiao-Chun Hang<sup>a\*</sup> and Ji-Chang Xiao<sup>b\*</sup>

<sup>a</sup>Key Laboratory of Flexible Electronics (KLOFE) and Institute of Advanced Materials (IAM), Nanjing Tech University (NanjingTech), 30 South Puzhu Road, Nanjing 211800, China

<sup>b</sup>Key Laboratory of Organofluorine Chemistry, Shanghai Institute of Organic Chemistry, University of Chinese Academy of Sciences, Chinese Academy of Sciences, 345 Lingling Road, Shanghai 200032, China

<sup>c</sup>Shandong NHU Amino Acid Co., LTD.

Dr. Jin-Hong Lin, Tel: (+86)21-5492-5541; E-mail: jlin@sioc.ac.cn.

Prof. Xiao-Chun Hang, Tel: (+86)25-8358-7982; E-mail: iamxchhang@njtech.edu.cn.

Prof. Ji-Chang Xiao, Tel: (+86)21-5492-5340; E-mail: jchxiao@sioc.ac.cn.

### Table of Contents

|                                                                                                       |     |
|-------------------------------------------------------------------------------------------------------|-----|
| 1. General information.....                                                                           | S2  |
| 2. General procedure for trifluoroethylation of alkenes .....                                         | S2  |
| 3. General procedure for difluoroethylation of alkenes.....                                           | S4  |
| 4. General procedure for methoxytrifluoroethylation of alkenes .....                                  | S6  |
| 5. General procedure for methoxydifluoroethylation of alkenes.....                                    | S8  |
| 6. Cyclic voltammetry studies .....                                                                   | S10 |
| 7. References .....                                                                                   | S12 |
| 8. Copies of <sup>1</sup> H NMR, <sup>19</sup> F NMR and <sup>13</sup> C NMR spectra of products..... | S13 |

## 1. General information

$^1\text{H}$ ,  $^{13}\text{C}$  and  $^{19}\text{F}$  NMR spectra were detected on a 500 MHz, 400 MHz or 300 MHz NMR spectrometer. Data for  $^1\text{H}$  NMR,  $^{13}\text{C}$  NMR and  $^{19}\text{F}$  NMR were recorded as follows: chemical shift ( $\delta$ , ppm), multiplicity (s = singlet, d = doublet, t = triplet, m = multiplet, q = quartet, coupling constant (s) in Hz). Mass spectra were obtained on GC-MS or LC-MS (ESI). High resolution mass data were recorded on a high resolution mass spectrometer in the EI or ESI mode. The mass analyzer types for HRMS-EI, HRMS-ESI, and HRMSMALDI are time-of-flight, Fourier transform mass spectrometer, and Fourier transform mass spectrometer, respectively. Unless otherwise noted, all reagents were obtained commercially and used without further purification.

## 2. General procedure for trifluoroethylation of alkenes

Into a 5 mL sealed tube were added alkene **1** (0.5 mmol, 1.0 equiv.), reagent **I** (1.5 mmol, 3 equiv.), CuO (1.0 mmol, 2 equiv.), Ir(ppy)<sub>3</sub> (0.015 mmol, 3 mol%) and DMAc (3 mL) under a N<sub>2</sub> atmosphere. The tube was sealed and the reaction mixture was exposed to blue light and stirred at room temperature for 24 h. The solid was removed by filtration and washed with ethyl acetate (20 mL). The combined organic phase was washed with water (10 mL  $\times$  3), dried over Na<sub>2</sub>SO<sub>4</sub>, and the solvent was removed by concentration.

As the desired product and the byproduct Ph<sub>2</sub>S have similar polarity, it was hard to isolate the desired product by direct flash column chromatography. Ph<sub>2</sub>S was oxidized first by Me<sub>3</sub>O<sup>+</sup> BF<sub>4</sub><sup>-</sup>. The procedure is shown as follows. The mixture obtained above was dissolved in dichloromethane (3 mL), and Me<sub>3</sub>O<sup>+</sup> BF<sub>4</sub><sup>-</sup> (400 mg, 2.7 mmol) was added into the solution. After the mixture was stirred at room temperature overnight, ethyl acetate (20 mL) was added. The mixture was washed with water (10 mL  $\times$  3), dried over Na<sub>2</sub>SO<sub>4</sub>. The solvent was removed by concentration, and the residue was subjected to flash column chromatography to afford the final product.

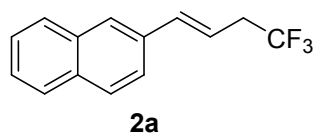

(*E*)-2-(4,4,4-trifluorobut-1-en-1-yl)naphthalene (**2a**)<sup>1</sup>: White solid, 70.9 mg, 60%.  $^1\text{H}$  NMR (400 MHz, CDCl<sub>3</sub>)  $\delta$  7.82 - 7.79 (m, 3H), 7.74 (s, 1H), 7.59 (dd,  $J$  = 8.7, 1.8 Hz, 1H), 7.50 - 7.44 (m, 2H), 6.77 (d,  $J$  = 15.8 Hz, 1H), 6.24 (dt,  $J$  = 16.0, 7.2 Hz, 1H), 3.11 - 3.01 (m, 2H).  $^{19}\text{F}$  NMR (376 MHz, CDCl<sub>3</sub>)  $\delta$  -66.2 (t,  $J$  = 10.6 Hz, 3F).

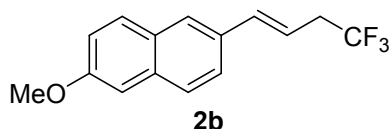

(*E*)-2-methoxy-6-(4,4,4-trifluorobut-1-en-1-yl)naphthalene (**2b**): White solid. M.p. 102 °C. 73.2 mg, 55%. <sup>1</sup>H NMR (400 MHz, CDCl<sub>3</sub>) δ 7.72 – 7.67 (m, 3H), 7.56 (dd, *J* = 8.6, 1.8 Hz, 1H), 7.16 – 7.11 (m, 2H), 6.72 (d, *J* = 15.8 Hz, 1H), 6.18 (dt, *J* = 15.7, 7.3 Hz, 1H), 3.92 (s, 3H), 3.09 – 2.99 (m, 2H). <sup>19</sup>F NMR (376 MHz, CDCl<sub>3</sub>) δ -66.2 (t, *J* = 10.6 Hz, 3F). <sup>13</sup>C NMR (101 MHz, CDCl<sub>3</sub>) δ 158.0 (s), 136.8 (s), 134.4 (s), 131.6 (s), 129.6 (s), 128.9 (s), 127.2 (s), 126.4 (s), 126.0 (q, *J* = 277.8 Hz), 123.9 (s), 119.1 (s), 116.4 (q, *J* = 3.7 Hz), 105.9 (s), 55.3 (s), 37.8 (q, *J* = 29.8 Hz). IR (neat) ν = 3058, 2969, 2849, 1628, 1601, 1260, 1245, 1109, 1031, 970, 857, 818, 770 cm<sup>-1</sup>. HRMS (EI): calcd. for C<sub>15</sub>H<sub>13</sub>F<sub>3</sub>O [M]<sup>+</sup>: 266.0918, Found: 266.0920.

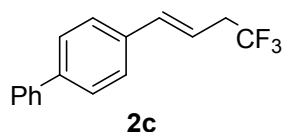

(*E*)-4-(4,4,4-trifluorobut-1-en-1-yl)-1,1'-biphenyl (**2c**)<sup>2</sup>: White solid, 91.8 mg, 70%. <sup>1</sup>H NMR (400 MHz, CDCl<sub>3</sub>) δ 7.64 – 7.59 (m, 4H), 7.49 – 7.46 (m, 4H), 7.38 (tt, *J* = 7.6, 1.6 Hz, 1H), 6.67 (d, *J* = 15.9 Hz, 1H), 6.19 (dt, *J* = 15.9, 7.3 Hz, 1H), 3.09 – 2.99 (m, 2H). <sup>19</sup>F NMR (376 MHz, CDCl<sub>3</sub>) δ -66.2 (t, *J* = 10.7 Hz, 3F).

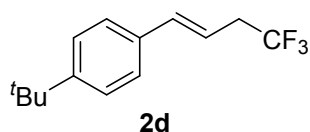

(*E*)-1-(tert-butyl)-4-(4,4,4-trifluorobut-1-en-1-yl)benzene (**2d**)<sup>1</sup>: Colorless oil, 72.7 mg, 60%. <sup>1</sup>H NMR (400 MHz, CDCl<sub>3</sub>) δ 7.38 – 7.32 (m, 4H), 6.59 (d, *J* = 15.8 Hz, 1H), 6.08 (dt, *J* = 15.8, 7.2 Hz, 1H), 3.03 – 2.93 (m, 2H), 1.33 (s, 9H). <sup>19</sup>F NMR (376 MHz, CDCl<sub>3</sub>) δ -66.3 (t, *J* = 10.6 Hz, 3F).

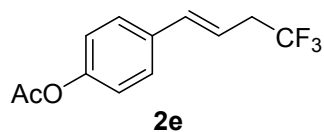

(*E*)-4-(4,4,4-trifluorobut-1-en-1-yl)phenyl acetate (**2e**)<sup>1</sup>: White solid, 86.7 mg, 71%. <sup>1</sup>H NMR (400 MHz, CDCl<sub>3</sub>) δ 7.38 (d, *J* = 8.5 Hz, 2H), 7.06 (d, *J* = 8.6 Hz, 2H), 6.58 (d, *J* = 15.9 Hz, 1H), 6.06 (dt, *J* = 15.8, 7.2 Hz, 1H), 3.03 – 2.93 (m, 2H), 2.29 (s, 3H). <sup>19</sup>F NMR (376 MHz, CDCl<sub>3</sub>) δ -66.3 (t, *J* = 10.6 Hz, 3F).

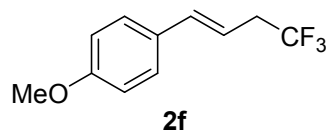

(*E*)-1-methoxy-4-(4,4,4-trifluorobut-1-en-1-yl)benzene (**2f**)<sup>1</sup>: Light yellow oil, 49.7 mg, 46%. <sup>1</sup>H NMR (400 MHz, CDCl<sub>3</sub>) δ 7.32 (d, *J* = 8.6 Hz, 2H), 6.86 (d, *J* = 8.5 Hz, 2H), 6.54 (d, *J* = 15.8 Hz, 1H), 5.97 (dt, *J* = 16.0, 7.2 Hz, 1H), 3.81 (s, 3H), 3.01 –

2.92 (m, 2H).  $^{19}\text{F}$  NMR (376 MHz,  $\text{CDCl}_3$ )  $\delta$  -66.4 (t,  $J$  = 10.6 Hz, 3F).

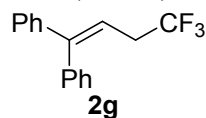

(4,4,4-trifluorobut-1-en-1,1-diyl)dibenzene (**2g**)<sup>1</sup>: Colorless oil, 102.3 mg, 78%.  $^1\text{H}$  NMR (400 MHz,  $\text{CDCl}_3$ )  $\delta$  7.42 – 7.32 (m, 3H), 7.30 – 7.22 (m, 5H), 7.18 – 7.16 (m, 2H), 6.06 (t,  $J$  = 7.4 Hz, 1H), 2.95 – 2.85 (m, 2H).  $^{19}\text{F}$  NMR (376 MHz,  $\text{CDCl}_3$ )  $\delta$  -65.7 (t,  $J$  = 10.7 Hz, 3F).

### 3. General procedure for difluoroethylation of alkenes

Into a 5 mL sealed tube were added alkene **1** (0.5 mmol, 1.0 equiv.), reagent **II** (1.5 mmol, 3 equiv.), CuO (1.0 mmol, 2 equiv.), Ir(ppy)<sub>3</sub> (0.015 mmol, 3 mol%) and DMAc (3 mL) under a  $\text{N}_2$  atmosphere. The tube was sealed and the reaction mixture was exposed to blue light and stirred at room temperature for 48 h. The solid was removed by filtration and washed with ethyl acetate (20 mL). The combined organic phase was washed with water (10 mL  $\times$  3), dried over  $\text{Na}_2\text{SO}_4$ . After the solvent was removed by concentration, the residue was subjected to flash column chromatography to afford the final product.

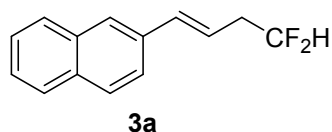

(*E*)-2-(4,4-difluorobut-1-en-1-yl)naphthalene (**3a**): White solid. M.p. 70 °C. 56.7 mg, 52%.  $^1\text{H}$  NMR (400 MHz,  $\text{CDCl}_3$ )  $\delta$  7.84 – 7.80 (m, 3H), 7.74 (s, 1H), 7.61 (dd,  $J$  = 8.6, 1.7 Hz, 1H), 7.53 – 7.46 (m, 2H), 6.73 (d,  $J$  = 15.9 Hz, 1H), 6.28 (dt,  $J$  = 15.9, 7.2 Hz, 1H), 5.93 (tt,  $J$  = 56.7, 4.4 Hz, 1H), 2.89 – 2.77 (m, 2H).  $^{19}\text{F}$  NMR (376 MHz,  $\text{CDCl}_3$ )  $\delta$  -115.4 (dt,  $J$  = 56.6, 17.2 Hz, 2F).  $^{13}\text{C}$  NMR (101 MHz,  $\text{CDCl}_3$ )  $\delta$  135.4 (s), 134.1 (s), 133.6 (s), 133.1 (s), 128.3 (s), 128.0 (s), 127.7 (s), 126.37 (s), 126.33 (s), 126.0 (s), 123.4 (s), 119.9 (t,  $J$  = 6.8 Hz), 116.3 (t,  $J$  = 240.7 Hz), 38.2 (t,  $J$  = 22.0 Hz). IR (neat)  $\nu$  = 3053, 2989, 2921, 1594, 1507, 1393, 1208, 1119, 1050, 816, 751, 479  $\text{cm}^{-1}$ . HRMS (EI): calcd. for  $\text{C}_{14}\text{H}_{12}\text{F}_2$  [ $\text{M}$ ]<sup>+</sup>: 218.0907, Found: 218.0903.

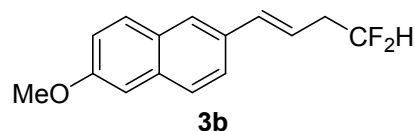

(*E*)-2-(4,4-difluorobut-1-en-1-yl)-6-methoxynaphthalene (**3b**): White solid. M.p. 95 °C. 63.3 mg, 51%.  $^1\text{H}$  NMR (400 MHz,  $\text{CDCl}_3$ )  $\delta$  7.71 – 7.65 (m, 3H), 7.55 (dd,  $J$  = 8.6, 1.6 Hz, 1H), 7.15 – 7.11 (m, 2H), 6.68 (d,  $J$  = 15.9 Hz, 1H), 6.20 (dt,  $J$  = 15.8, 7.2 Hz, 1H), 5.90 (tt,  $J$  = 56.8, 4.5 Hz, 1H), 3.92 (s, 3H), 2.86 – 2.74 (m, 2H).  $^{19}\text{F}$  NMR (376 MHz,  $\text{CDCl}_3$ )  $\delta$  -115.5 (dt,  $J$  = 56.7, 17.1 Hz, 2F).  $^{13}\text{C}$  NMR (101 MHz,  $\text{CDCl}_3$ )  $\delta$  157.8 (s), 135.4 (s), 134.2 (s), 132.0 (s), 129.5 (s), 128.9 (s), 127.1 (s), 126.1 (s),

124.0 (s), 119.1 (s), 118.8 (t,  $J = 7.0$  Hz), 116.3 (t,  $J = 240.8$  Hz), 105.9 (s), 55.3 (s), 38.2 (t,  $J = 22.0$  Hz). IR (neat)  $\nu = 2977, 2851, 1630, 1601, 1244, 1205, 1117, 1024, 858, 822, 772, 478$   $\text{cm}^{-1}$ . HRMS (EI): calcd. for  $\text{C}_{15}\text{H}_{14}\text{F}_2\text{O}$   $[\text{M}]^+$ : 248.1013, Found: 248.1020.

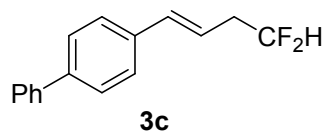

(*E*)-4-(4,4-difluorobut-1-en-1-yl)-1,1'-biphenyl (**3c**): White solid. M.p. 104 °C. 68.4 mg, 56%.  $^1\text{H}$  NMR (400 MHz,  $\text{CDCl}_3$ )  $\delta$  7.63 – 7.57 (m, 4H), 7.47 – 7.44 (m, 4H), 7.36 (tt,  $J = 7.2, 1.6$  Hz, 1H), 6.61 (d,  $J = 15.9$  Hz, 1H), 6.19 (dt,  $J = 15.7, 7.3$  Hz, 1H), 5.90 (tt,  $J = 56.7, 4.4$  Hz, 1H), 2.85 – 2.74 (m, 2H).  $^{19}\text{F}$  NMR (376 MHz,  $\text{CDCl}_3$ )  $\delta$  -115.6 (dt,  $J = 56.6, 17.3$  Hz, 2F).  $^{13}\text{C}$  NMR (101 MHz,  $\text{CDCl}_3$ )  $\delta$  140.63 (s), 140.57 (s), 135.7 (s), 134.9 (s), 128.8 (s), 127.4 (s), 127.3 (s), 127.0 (s), 126.7 (s), 119.7 (t,  $J = 6.7$  Hz), 116.3 (t,  $J = 240.7$  Hz), 38.1 (t,  $J = 22.0$  Hz). IR (neat)  $\nu = 3032, 2972, 1913, 1488, 1408, 1118, 1061, 970, 846, 758, 688, 468$   $\text{cm}^{-1}$ . HRMS (EI): calcd. for  $\text{C}_{16}\text{H}_{14}\text{F}_2$   $[\text{M}]^+$ : 244.1064, Found: 244.1073.

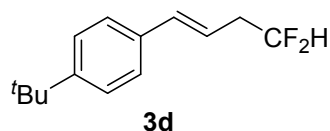

(*E*)-1-(tert-butyl)-4-(4,4-difluorobut-1-en-1-yl)benzene (**3d**). This product also has similar polarity with that of byproduct  $\text{Ph}_2\text{S}$ . Therefore, the oxidation of  $\text{Ph}_2\text{S}$  was necessary. The oxidation process was shown in trifluoroethylation of alkenes except that the oxidation reaction should be quenched within a period of 3 h as the desired product is slightly sensitive to the oxidation reagent. Colorless oil, 59.4 mg, 53%.  $^1\text{H}$  NMR (400 MHz,  $\text{CDCl}_3$ )  $\delta$  7.36 – 7.30 (m, 4H), 6.54 (d,  $J = 15.9$  Hz, 1H), 6.09 (dt,  $J = 15.8, 7.3$  Hz, 1H), 5.85 (tt,  $J = 56.8, 4.5$  Hz, 1H), 2.81 – 2.69 (m, 2H), 1.32 (s, 9H).  $^{19}\text{F}$  NMR (376 MHz,  $\text{CDCl}_3$ )  $\delta$  -115.6 (dt,  $J = 56.6, 17.2$  Hz, 2F).  $^{13}\text{C}$  NMR (101 MHz,  $\text{CDCl}_3$ )  $\delta$  150.9 (s), 135.1 (s), 133.9 (s), 126.0 (s), 125.5 (s), 118.7 (t,  $J = 6.8$  Hz), 116.3 (t,  $J = 240.7$  Hz), 38.1 (t,  $J = 21.9$  Hz), 34.6 (s), 31.3 (s). IR (neat)  $\nu = 2964, 2906, 1515, 1393, 1267, 1209, 1117, 1055, 968, 890, 806, 557$   $\text{cm}^{-1}$ . HRMS (EI): calcd. for  $\text{C}_{14}\text{H}_{18}\text{F}_2$   $[\text{M}]^+$ : 224.1377, Found: 224.1379.

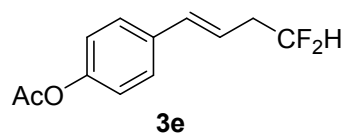

(*E*)-4-(4,4-difluorobut-1-en-1-yl)phenyl acetate (**3e**): White solid. M.p. 49 °C. 73.5 mg, 65%.  $^1\text{H}$  NMR (400 MHz,  $\text{CDCl}_3$ )  $\delta$  7.37 (d,  $J = 8.6$  Hz, 2H), 7.05 (d,  $J = 8.6$  Hz, 2H), 6.54 (d,  $J = 16.0$  Hz, 1H), 6.08 (dt,  $J = 15.8, 7.3$  Hz, 1H), 5.86 (tt,  $J = 56.6, 4.4$  Hz, 1H), 2.81 – 2.69 (m, 2H), 2.30 (s, 3H).  $^{19}\text{F}$  NMR (376 MHz,  $\text{CDCl}_3$ )  $\delta$  -115.7 (dt,  $J = 56.6, 17.3$  Hz, 2F).  $^{13}\text{C}$  NMR (101 MHz,  $\text{CDCl}_3$ )  $\delta$  169.4 (s), 150.2 (s), 134.5 (s), 134.3 (s), 127.3 (s), 121.7 (s), 119.8 (t,  $J = 6.8$  Hz), 116.1 (t,  $J = 240.7$  Hz), 38.0 (t,  $J = 22.0$  Hz), 21.1 (s). IR (neat)  $\nu = 2986, 1755, 1600, 1508, 1374, 1221, 1116, 1052,$

1016, 912, 854, 594, 505  $\text{cm}^{-1}$ . HRMS (EI): calcd. for  $\text{C}_{12}\text{H}_{12}\text{F}_2\text{O}_2$   $[\text{M}]^+$ : 226.0805, Found: 226.0797.

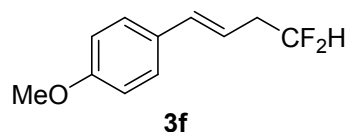

(*E*)-1-(4,4-difluorobut-1-en-1-yl)-4-methoxybenzene (**3f**)<sup>2</sup>: Light yellow oil, 46.6 mg, 47%.  $^1\text{H}$  NMR (400 MHz,  $\text{CDCl}_3$ )  $\delta$  7.31 (d,  $J$  = 8.8 Hz, 2H), 6.86 (d,  $J$  = 8.8 Hz, 2H), 6.50 (d,  $J$  = 15.9 Hz, 1H), 5.99 (dt,  $J$  = 15.8, 7.3 Hz, 1H), 5.85 (tt,  $J$  = 56.8, 4.4 Hz, 1H), 3.81 (s, 3H), 2.79 – 2.67 (m, 2H).  $^{19}\text{F}$  NMR (376 MHz,  $\text{CDCl}_3$ )  $\delta$  -115.6 (dt,  $J$  = 56.6, 17.1 Hz, 2F).

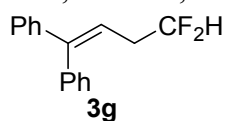

(4,4-difluorobut-1-ene-1,1-diyl)dibenzene (**3g**): Colorless oil, 86.7 mg, 71%.  $^1\text{H}$  NMR (400 MHz,  $\text{CDCl}_3$ )  $\delta$  7.41 – 7.32 (m, 3H), 7.30 – 7.23 (m, 5H), 7.18 – 7.16 (m, 2H), 6.07 (t,  $J$  = 7.5 Hz, 1H), 5.83 (tt,  $J$  = 56.8, 4.4 Hz, 1H), 2.73 – 2.61 (m, 2H).  $^{19}\text{F}$  NMR (376 MHz,  $\text{CDCl}_3$ )  $\delta$  -115.5 (dt,  $J$  = 56.9, 17.6 Hz, 2F).  $^{13}\text{C}$  NMR (101 MHz,  $\text{CDCl}_3$ )  $\delta$  146.6 (s), 141.8 (s), 139.2 (s), 129.6 (s), 128.5 (s), 128.2 (s), 127.6 (s), 127.5 (s), 127.3 (s), 118.2 (t,  $J$  = 6.5 Hz), 116.3 (t,  $J$  = 240.8 Hz), 35.06 (t,  $J$  = 21.8 Hz). IR (neat)  $\nu$  = 3057, 2977, 1599, 1494, 1445, 1393, 1121, 1052, 888, 762, 702, 592  $\text{cm}^{-1}$ . HRMS (EI): calcd. for  $\text{C}_{16}\text{H}_{14}\text{F}_2$   $[\text{M}]^+$ : 244.1064, Found: 244.1060.

#### 4. General procedure for methoxytrifluoroethylation of alkenes

Into a 5 mL sealed tube were added alkenes **1** (0.5 mmol, 1.0 equiv.), reagent **I** (1.0 mmol, 2 equiv.),  $\text{Ir}(\text{ppy})_3$  (0.01 mmol, 2 mol%) and MeOH (3 mL) under a  $\text{N}_2$  atmosphere. The tube was sealed and the reaction mixture was exposed to blue light and stirred at room temperature for 12 h. Ethyl acetate (20 mL) was added, and the resulting organic phase was washed with water (10 mL  $\times$  3), dried over  $\text{Na}_2\text{SO}_4$ . After the solvent was removed by concentration, the residue was subjected to flash column chromatography to afford the final product.

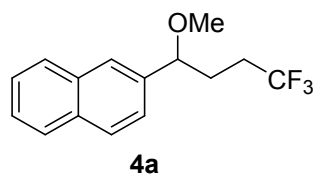

2-(4,4,4-trifluoro-1-methoxybutyl)naphthalene (**4a**): Colorless oil, 107.3 mg, 80%.  $^1\text{H}$  NMR (400 MHz,  $\text{CDCl}_3$ )  $\delta$  7.90– 7.86 (m, 3H), 7.75 (s, 1H), 7.55 – 7.49 (m, 2H), 7.45 (dd,  $J$  = 8.5, 1.7 Hz, 1H), 4.35 (dd,  $J$  = 7.6, 5.6 Hz, 1H), 3.28 (s, 3H), 2.38 – 1.96 (m, 4H).  $^{19}\text{F}$  NMR (376 MHz,  $\text{CDCl}_3$ )  $\delta$  -66.2 (t,  $J$  = 10.8 Hz, 3F).  $^{13}\text{C}$  NMR (101 MHz,  $\text{CDCl}_3$ )  $\delta$  138.4 (s), 133.24 (s), 133.21 (s), 128.7 (s), 127.84 (s), 127.75 (s),

127.3 (q,  $J = 276.7$  Hz), 126.3 (s), 126.0 (s), 125.8 (s), 124.0 (s), 82.2 (s), 56.8 (s), 30.33 (q,  $J = 3.0$  Hz), 30.26 (q,  $J = 29.3$  Hz). IR (neat)  $\nu = 3057, 2936, 2825, 1508, 1451, 1253, 1195, 1010, 858, 821, 749, 479$   $\text{cm}^{-1}$ . HRMS (EI): calcd. for  $\text{C}_{15}\text{H}_{15}\text{OF}_3$   $[\text{M}]^+$ : 268.1075, Found: 268.1078.

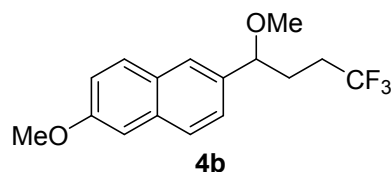

2-methoxy-6-(4,4,4-trifluoro-1-methoxybutyl)naphthalene (**4b**): White solid. M.p. 65 °C. 101.4 mg, 68%.  $^1\text{H}$  NMR (400 MHz,  $\text{CDCl}_3$ )  $\delta$  7.79 – 7.74 (m, 2H), 7.66 (s, 1H), 7.41 (dd,  $J = 8.4, 1.8$  Hz, 1H), 7.21 – 7.16 (m, 2H), 4.32 – 4.28 (m, 1H), 3.94 (s, 3H), 3.26 (s, 3H), 2.34 – 1.94 (m, 4H).  $^{19}\text{F}$  NMR (376 MHz,  $\text{CDCl}_3$ )  $\delta$  -66.2 (t,  $J = 10.8$  Hz, 3F).  $^{13}\text{C}$  NMR (101 MHz,  $\text{CDCl}_3$ )  $\delta$  157.8 (s), 136.0 (s), 134.4 (s), 129.3 (s), 128.6 (s), 127.5 (s), 127.3 (q,  $J = 276.7$  Hz), 125.7 (s), 124.5 (s), 119.1 (s), 105.7 (s), 82.2 (s), 56.6 (s), 55.3 (s), 30.31 (q,  $J = 3.0$  Hz), 30.29 (q,  $J = 29.3$  Hz). IR (neat)  $\nu = 3059, 2939, 2825, 1608, 1508, 1418, 1267, 1172, 1033, 854, 655, 476$   $\text{cm}^{-1}$ . HRMS (EI): calcd. for  $\text{C}_{16}\text{H}_{17}\text{O}_2\text{F}_3$   $[\text{M}]^+$ : 298.1181, Found: 298.1185.

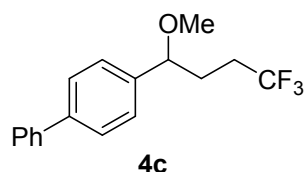

4-(4,4,4-trifluoro-1-methoxybutyl)-1,1'-biphenyl (**4c**): White solid. M.p. 60 °C. 125.1 mg, 85%.  $^1\text{H}$  NMR (400 MHz,  $\text{CDCl}_3$ )  $\delta$  7.64 – 7.62 (m, 4H), 7.47 (t,  $J = 7.5$  Hz, 2H), 7.40 – 7.36 (m, 3H), 4.23 (dd,  $J = 8.1, 5.0$  Hz, 1H), 3.29 (s, 3H), 2.39 – 1.92 (m, 4H).  $^{19}\text{F}$  NMR (376 MHz,  $\text{CDCl}_3$ )  $\delta$  -66.2 (t,  $J = 10.9$  Hz, 3F).  $^{13}\text{C}$  NMR (101 MHz,  $\text{CDCl}_3$ )  $\delta$  140.9 (s), 140.7 (s), 140.0 (s), 128.8 (s), 127.4 (s), 127.3 (q,  $J = 276.7$  Hz), 127.1 (s), 126.9 (s), 81.8 (s), 56.8 (s), 30.5 (q,  $J = 3.0$  Hz), 30.3 (q,  $J = 28.3$  Hz). IR (neat)  $\nu = 3000, 2935, 2827, 1567, 1451, 1348, 1249, 1128, 836, 762, 691, 581$   $\text{cm}^{-1}$ . HRMS (EI): calcd. for  $\text{C}_{17}\text{H}_{17}\text{OF}_3$   $[\text{M}]^+$ : 294.1231, Found: 294.1240.

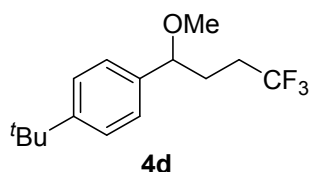

1-(tert-butyl)-4-(4,4,4-trifluoro-1-methoxybutyl)benzene (**4d**): Colorless oil, 90.5 mg, 66%.  $^1\text{H}$  NMR (400 MHz,  $\text{CDCl}_3$ )  $\delta$  7.40 (d,  $J = 8.3$  Hz, 2H), 7.22 (d,  $J = 7.9$  Hz, 2H), 4.15 (dd,  $J = 8.1, 5.0$  Hz, 1H), 3.24 (s, 3H), 2.35 – 1.87 (m, 4H), 1.35 (s, 9H).  $^{19}\text{F}$  NMR (376 MHz,  $\text{CDCl}_3$ )  $\delta$  -66.2 (t,  $J = 10.9$  Hz, 3F).  $^{13}\text{C}$  NMR (101 MHz,  $\text{CDCl}_3$ )  $\delta$  150.9 (s), 137.9 (s), 127.3 (q,  $J = 277.8$  Hz), 126.2 (s), 125.5 (s), 81.9 (s), 56.7 (s), 34.5 (s), 31.4 (s), 30.4 (q,  $J = 2.7$  Hz), 30.3 (q,  $J = 29.3$  Hz). IR (neat)  $\nu = 2964, 2870, 2825, 1510, 1452, 1347, 1253, 1143, 1099, 1008, 834, 589$   $\text{cm}^{-1}$ . HRMS (EI): calcd. for  $\text{C}_{15}\text{H}_{21}\text{OF}_3$   $[\text{M}]^+$ : 274.1544, Found: 274.1544.

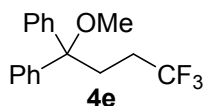

(4,4,4-trifluoro-1-methoxybutane-1,1-diyl)dibenzene (**4e**): White solid. M.p. 62 °C. 91.2 mg, 62%. <sup>1</sup>H NMR (400 MHz, CDCl<sub>3</sub>) δ 7.35 – 7.28 (m, 8H), 7.24 – 7.20 (m, 2H), 3.06 (s, 3H), 2.58 – 2.54 (m, 2H), 1.97 – 1.85 (m, 2H). <sup>19</sup>F NMR (376 MHz, CDCl<sub>3</sub>) δ -66.1 (t, *J* = 11.0 Hz, 3F). <sup>13</sup>C NMR (101 MHz, CDCl<sub>3</sub>) δ 144.2 (s), 128.2 (s), 127.7 (q, *J* = 276.7 Hz), 127.1 (s), 126.7 (s), 81.2 (s), 49.9 (s), 28.2 (q, *J* = 29.3 Hz), 27.4 (q, *J* = 3.0 Hz). IR (neat) ν = 3061, 2954, 2830, 1600, 1448, 1389, 1320, 1256, 1141, 1093, 1007, 699, 601 cm<sup>-1</sup>. HRMS (EI): calcd. for C<sub>17</sub>H<sub>17</sub>OF<sub>3</sub> [M]<sup>+</sup>: 294.1231, Found: 294.1227.

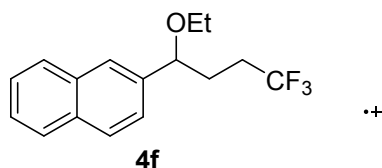

2-(1-ethoxy-4,4,4-trifluorobutyl)naphthalene (**4f**): EtOH/DMAc (v/v = 1 mL/2 mL) was used as the solvent instead of MeOH. Colorless oil, 80.5 mg, 57%. <sup>1</sup>H NMR (400 MHz, CDCl<sub>3</sub>) δ 7.88 - 7.83 (m, 3H), 7.74 (s, 1H), 7.54 – 7.48 (m, 2H), 7.46 (dd, *J* = 8.5, 1.7 Hz, 1H), 4.45 (dd, *J* = 7.9, 4.9 Hz, 1H), 3.48 – 3.33 (m, 2H), 2.39 – 1.94 (m, 4H), 1.21 (t, *J* = 7.0 Hz, 3H). <sup>19</sup>F NMR (376 MHz, CDCl<sub>3</sub>) δ -66.1 (t, *J* = 10.7 Hz, 3F). <sup>13</sup>C NMR (101 MHz, CDCl<sub>3</sub>) δ 139.2 (s), 133.20 (s), 133.17 (s), 128.6 (s), 127.8 (s), 127.7 (s), 127.33 (q, *J* = 277.1 Hz), 126.3 (s), 126.0 (s), 125.6 (s), 124.0 (s), 80.3 (s), 64.3 (s), 30.5 (q, *J* = 2.7 Hz), 30.3 (q, *J* = 29.0 Hz), 15.2 (s). IR (neat) ν = 3058, 2977, 2870, 1451, 1387, 1340, 1252, 1141, 1094, 1020, 820, 748, 479 cm<sup>-1</sup>. HRMS (EI): calcd. for C<sub>16</sub>H<sub>17</sub>OF<sub>3</sub> [M]<sup>+</sup>: 282.1231, Found: 282.1234.

## 5. General procedure for methoxydifluoroethylation of alkenes

Into a 5 mL sealed tube were added alkenes **1** (0.5 mmol, 1.0 equiv.), reagent **II** (1.0 mmol, 2 equiv.), Ir(ppy)<sub>3</sub> (0.01 mmol, 2 mol%) and component solvent (MeOH 1 mL and DMAc 2 mL) under a N<sub>2</sub> atmosphere. The tube was sealed and the reaction mixture was exposed to blue light and stirred at room temperature for 30 h. Ethyl acetate (20 mL) was added, and the resulting organic phase was washed with water (10 mL × 3), dried over Na<sub>2</sub>SO<sub>4</sub>. After the solvent was removed by concentration, the residue was subjected to flash column chromatography to afford the final product.

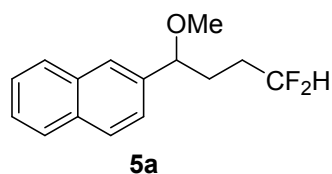

2-(4,4-difluoro-1-methoxybutyl)naphthalene (**5a**): Colorless oil, 83.8 mg, 67%.  $^1\text{H}$  NMR (400 MHz,  $\text{CDCl}_3$ )  $\delta$  7.88 – 7.83 (m, 3H), 7.73 (s, 1H), 7.53 – 7.47 (m, 2H), 7.43 (dd,  $J$  = 8.4, 1.7 Hz, 1H), 5.85 (tt,  $J$  = 56.9, 4.1 Hz, 1H), 4.32 (dd,  $J$  = 7.2, 5.2 Hz, 1H), 3.26 (s, 3H), 2.06 – 1.83 (m, 4H).  $^{19}\text{F}$  NMR (376 MHz,  $\text{CDCl}_3$ )  $\delta$  -115.34 (ddt,  $J$  = 280.1, 57.2, 17.3 Hz, 1F), -116.38 (ddt,  $J$  = 280.1, 57.2, 17.3 Hz, 1F).  $^{13}\text{C}$  NMR (101 MHz,  $\text{CDCl}_3$ )  $\delta$  138.8 (s), 133.22 (s), 133.20 (s), 128.6 (s), 127.8 (s), 127.7 (s), 126.2 (s), 126.0 (s), 125.8 (s), 124.1 (s), 117.3 (t,  $J$  = 240.4 Hz), 83.1 (s), 56.8 (s), 30.6 (t,  $J$  = 22.2 Hz), 30.4 (t,  $J$  = 5.1 Hz). IR (neat)  $\nu$  = 3056, 2934, 2824, 1508, 1403, 1111, 1067, 1018, 859, 821, 749, 479  $\text{cm}^{-1}$ . HRMS (EI): calcd. for  $\text{C}_{15}\text{H}_{16}\text{OF}_2$   $[\text{M}]^+$ : 250.1169, Found: 250.1176.

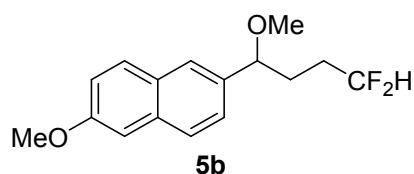

2-(4,4-difluoro-1-methoxybutyl)-6-methoxynaphthalene (**5b**): White solid. M.p. 42 °C. 99.5 mg, 71%.  $^1\text{H}$  NMR (400 MHz,  $\text{CDCl}_3$ )  $\delta$  7.77 (d,  $J$  = 9.2 Hz, 1H), 7.74 (d,  $J$  = 9.2 Hz, 1H), 7.65 (s, 1H), 7.40 (dd,  $J$  = 8.5, 1.7 Hz, 1H), 7.19 – 7.15 (m, 2H), 5.85 (tt,  $J$  = 57.3, 4.2 Hz, 1H), 4.28 (dd,  $J$  = 7.2, 5.2 Hz, 1H), 3.93 (s, 3H), 3.25 (s, 3H), 2.08 – 1.80 (m, 4H).  $^{19}\text{F}$  NMR (376 MHz,  $\text{CDCl}_3$ )  $\delta$  -115.29 (ddt,  $J$  = 278.2, 56.4, 15.0 Hz, 1F), -116.32 (ddt,  $J$  = 278.2, 56.4, 15.0 Hz, 1F).  $^{13}\text{C}$  NMR (101 MHz,  $\text{CDCl}_3$ )  $\delta$  157.8 (s), 136.5 (s), 134.4 (s), 129.3 (s), 128.7 (s), 127.4 (s), 125.7 (s), 124.7 (s), 119.1 (s), 117.3 (t,  $J$  = 240.4 Hz), 105.8 (s), 83.1 (s), 56.7 (s), 55.3 (s), 30.7 (t,  $J$  = 21.2 Hz), 30.4 (t,  $J$  = 5.1 Hz). IR (neat)  $\nu$  = 3058, 2937, 2824, 1608, 1484, 1390, 1267, 1230, 1111, 1068, 855, 477  $\text{cm}^{-1}$ . HRMS (EI): calcd. for  $\text{C}_{16}\text{H}_{18}\text{O}_2\text{F}_2$   $[\text{M}]^+$ : 280.1275, Found: 280.1274.

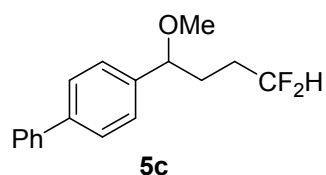

4-(4,4-difluoro-1-methoxybutyl)-1,1'-biphenyl (**5c**): White solid. M.p. 44 °C. 85.7 mg, 62%.  $^1\text{H}$  NMR (400 MHz,  $\text{CDCl}_3$ )  $\delta$  7.62 – 7.60 (m, 4H), 7.46 (t,  $J$  = 7.4 Hz, 2H), 7.38 – 7.35 (m, 3H), 5.86 (tt,  $J$  = 56.9, 4.1 Hz, 1H), 4.21 (dd,  $J$  = 7.2, 4.8 Hz, 1H), 3.27 (s, 3H), 2.08 – 1.82 (m, 4H).  $^{19}\text{F}$  NMR (376 MHz,  $\text{CDCl}_3$ )  $\delta$  -115.30 (ddt,  $J$  = 279.7, 57.2, 16.9 Hz, 1F), -116.36 (ddt,  $J$  = 279.7, 57.2, 16.9 Hz, 1F).  $^{13}\text{C}$  NMR (101 MHz,  $\text{CDCl}_3$ )  $\delta$  140.79 (s), 140.77 (s), 140.5 (s), 128.8 (s), 127.34 (s), 127.31 (s), 127.1 (s), 127.0 (s), 117.3 (t,  $J$  = 239.4 Hz), 82.7 (s), 56.8 (s), 30.6 (t,  $J$  = 22.2 Hz), 30.5 (t,  $J$  = 5.1 Hz). IR (neat)  $\nu$  = 3029, 2934, 2824, 1600, 1487, 1405, 1112, 1008, 979, 841, 765, 698  $\text{cm}^{-1}$ . HRMS (EI): calcd. for  $\text{C}_{17}\text{H}_{18}\text{OF}_2$   $[\text{M}]^+$ : 276.1326, Found: 276.1330.

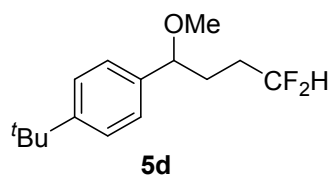

1-(tert-butyl)-4-(4,4-difluoro-1-methoxybutyl)benzene (**5d**): Colorless oil, 76.9 mg, 60%.  $^1\text{H}$  NMR (400 MHz,  $\text{CDCl}_3$ )  $\delta$  7.38 (d,  $J = 8.2$  Hz, 2H), 7.21 (d,  $J = 8.3$  Hz, 2H), 5.83 (tt,  $J = 57.0, 4.1$  Hz, 1H), 4.13 (dd,  $J = 6.8, 4.8$  Hz, 1H), 3.22 (s, 3H), 2.05 – 1.78 (m, 4H), 1.33 (s, 9H).  $^{19}\text{F}$  NMR (376 MHz,  $\text{CDCl}_3$ )  $\delta$  -115.27 (ddt,  $J = 279.7, 57.2, 16.9$  Hz, 1F), -116.32 (ddt,  $J = 279.7, 57.2, 16.9$  Hz, 1F).  $^{13}\text{C}$  NMR (101 MHz,  $\text{CDCl}_3$ )  $\delta$  150.7 (s), 138.2 (s), 126.2(s), 125.4 (s), 117.3 (t,  $J = 240.4$  Hz), 82.7 (s), 56.6 (s), 34.5 (s), 31.4 (s), 30.7 (t,  $J = 21.2$  Hz), 30.5 (t,  $J = 5.1$  Hz). IR (neat)  $\nu = 2965, 2870, 2824, 1510, 1449, 1405, 1305, 1112, 1070, 980, 835, 595\text{ cm}^{-1}$ . HRMS (EI): calcd. for  $\text{C}_{15}\text{H}_{22}\text{OF}_2$   $[\text{M}]^+$ : 256.1639, Found: 256.1647.

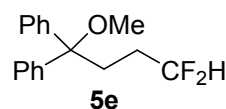

(4,4-difluoro-1-methoxybutane-1,1-diyl)dibenzene (**5e**): White solid. M.p. 63 °C. 98.1 mg, 71%.  $^1\text{H}$  NMR (400 MHz,  $\text{CDCl}_3$ )  $\delta$  7.37 – 7.28 (m, 8H), 7.24 – 7.20 (m, 2H), 5.78 (tt,  $J = 57.0, 4.2$  Hz, 1H), 3.06 (s, 3H), 2.50 – 2.46 (m, 2H), 1.76 – 1.62 (m, 2H).  $^{19}\text{F}$  NMR (376 MHz,  $\text{CDCl}_3$ )  $\delta$  -116.04 (dt,  $J = 56.8, 18.4$  Hz, 2F).  $^{13}\text{C}$  NMR (101 MHz,  $\text{CDCl}_3$ )  $\delta$  144.6 (s), 128.1 (s), 126.9 (s), 126.8 (s), 117.3 (t,  $J = 240.4$  Hz), 81.6 (s), 49.9 (s), 28.2 (t,  $J = 21.2$  Hz), 27.0 (t,  $J = 5.1$  Hz). IR (neat)  $\nu = 3059, 2944, 2828, 1598, 1447, 1404, 1199, 1129, 1065, 976, 753, 700\text{ cm}^{-1}$ . HRMS (EI): calcd. for  $\text{C}_{17}\text{H}_{18}\text{OF}_2$   $[\text{M}]^+$ : 276.1326, Found: 276.1335.

## 6. Cyclic Voltammetry studies

Electrochemical measurements were performed on a CHI660E electrochemical analyzer, using a standard three-electrode setup with a platinum working electrode (2 mm diameter), a platinum wire counter electrode, and a Ag/AgCl reference electrode. Sample **I** were prepared with reagent **I** (0.012 mmol) and Ferrocene (0.012 mmol) in the solution of  $^n\text{Bu}_4\text{NPF}_6$  in dry and degassed acetonitrile (2.5 mL, 0.1 M). Sample **II** were prepared with reagent **II** (0.5 mmol) and Ferrocene (0.012 mmol) in the solution of  $^n\text{Bu}_4\text{NPF}_6$  in dry and degassed acetonitrile (2.5 mL, 0.1 M). Solutions were kept under a  $\text{N}_2$  atmosphere during the measurements. Cyclic voltammetry (CV) with the following settings: Scan Rates = 0.1 V/s, Sweep Segments = 4, Sample Interval = 0.001 V, Quiet Time = 2 sec. Data was analyzed using Origin 2016, and Epc was the peak potential at the maximum current. The obtained value was referenced to Ag/AgCl and converted to Saturated Calomel Electrode (SCE). Reagent **I** :  $E_{\text{pc}} = -1.517\text{ V}$  vs SCE; Reagent **II** :  $E_{\text{pc}} = -1.237\text{ V}$  vs SCE.

Reagent I:  $\text{Ph}_2\text{S}^+\text{CH}_2\text{CF}_3 \text{ TfO}^-$

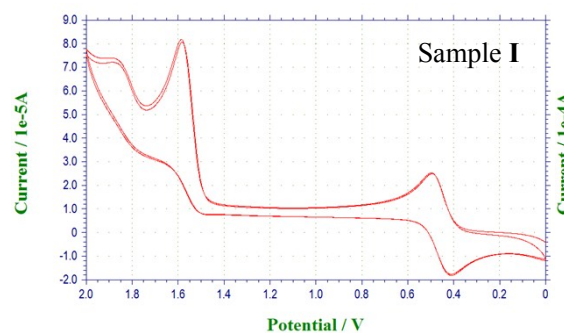

$E_{1/2}(\text{Fc}/\text{Fc}^+) = 0.453 \text{ V vs Ag/AgCl}$   
 $E_{1/2}(\text{Fc}/\text{Fc}^+) = 0.400 \text{ V vs SCE}^3$

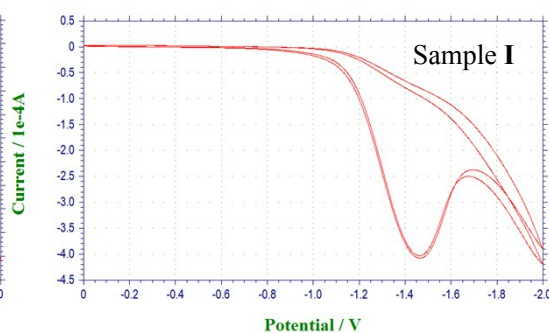

$E_{\text{pc}} = -1.464 \text{ V vs Ag/AgCl}$   
 $E_{\text{pc}} = -1.517 \text{ V vs SCE}$

Reagent II:  $\text{Ph}_2\text{S}^+\text{CH}_2\text{CF}_2\text{H TfO}^-$

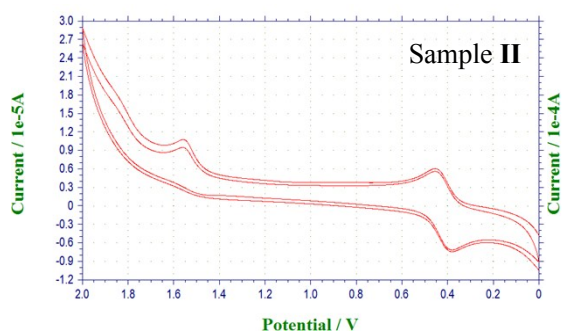

$E_{1/2}(\text{Fc}/\text{Fc}^+) = 0.418 \text{ V vs Ag/AgCl}$   
 $E_{1/2}(\text{Fc}/\text{Fc}^+) = 0.400 \text{ V vs SCE}^3$

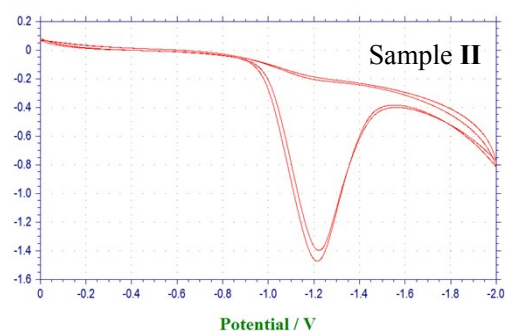

$E_{\text{pc}} = -1.219 \text{ V vs Ag/AgCl}$   
 $E_{\text{pc}} = -1.237 \text{ V vs SCE}$

## 7. References

- (1) L. M. Kreis, S. Krautwald, N. Pfeiffer, R. E. Martin, E. M. Carreira, *Org. Lett.* **2013**, 15, 1634–1637.
- (2) Y. Zhu, J. Gong, Y. Wang, *J. Org. Chem.* **2017**, 82, 7428-7436.
- (3) V. V. Pavlishchuk, A. W. Addison, *Inorg. Chim. Acta.* **2000**, 298, 97-102.

## 8. Copies of $^1\text{H}$ NMR, $^{19}\text{F}$ NMR and $^{13}\text{C}$ NMR spectra of products

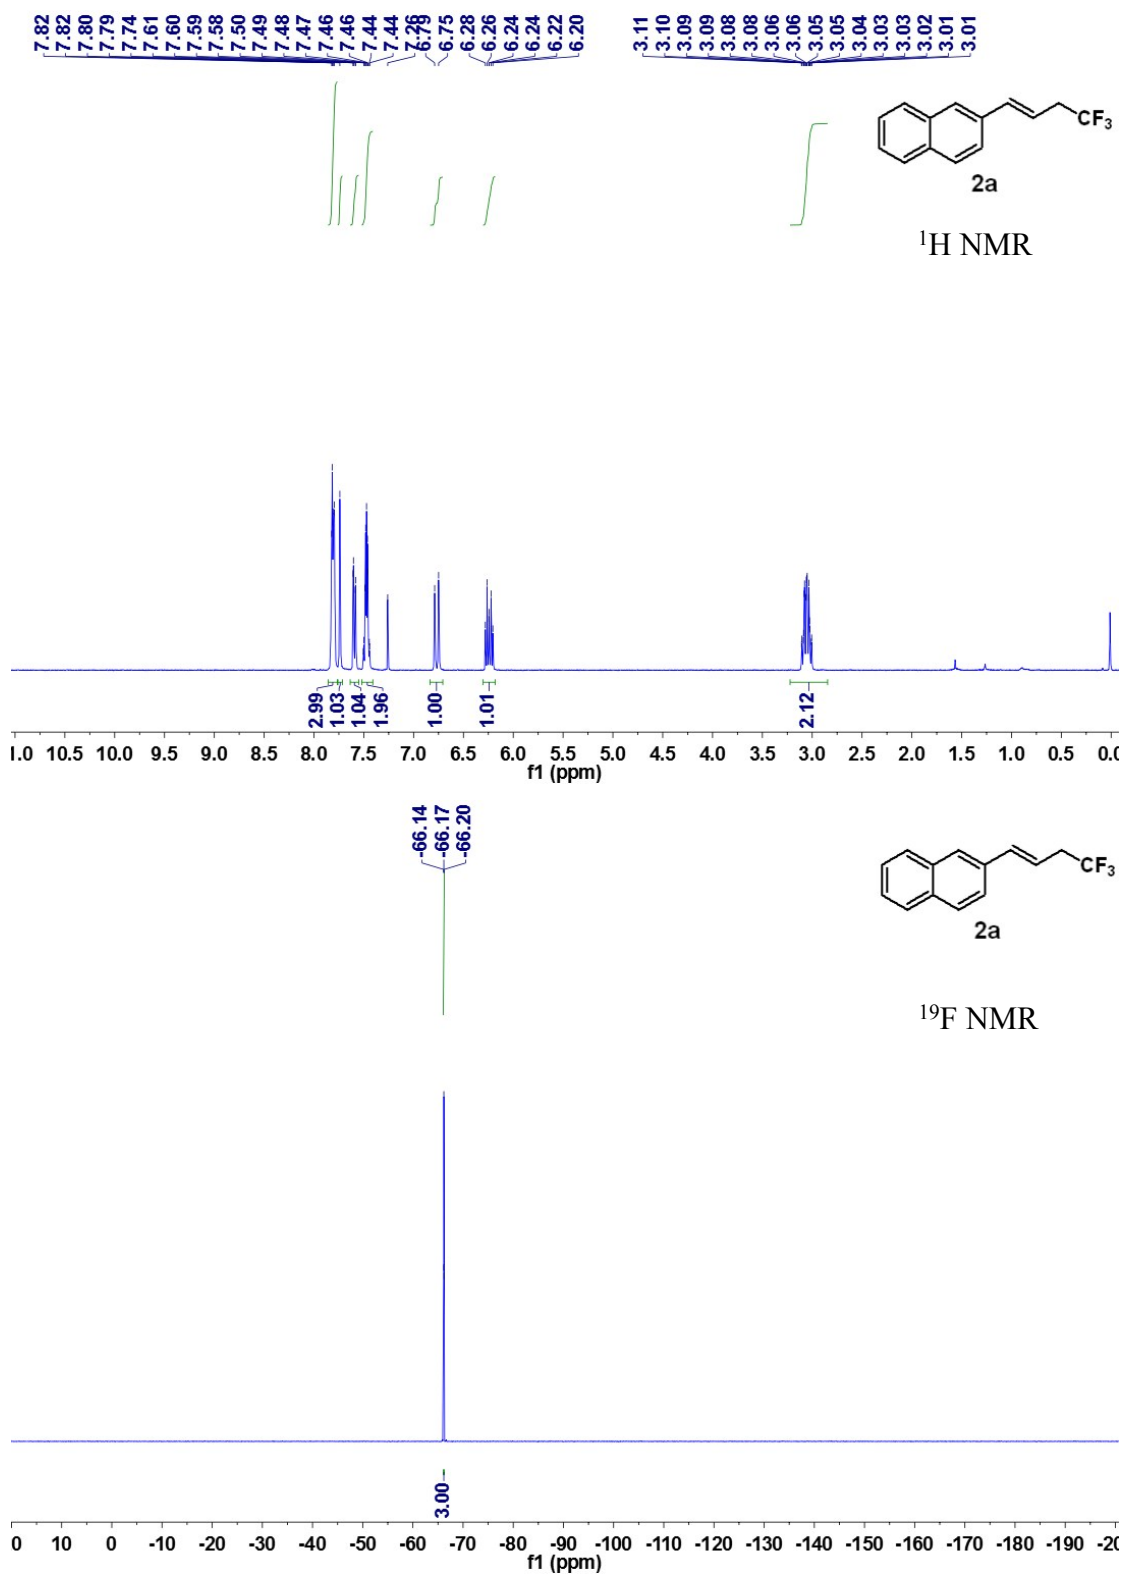

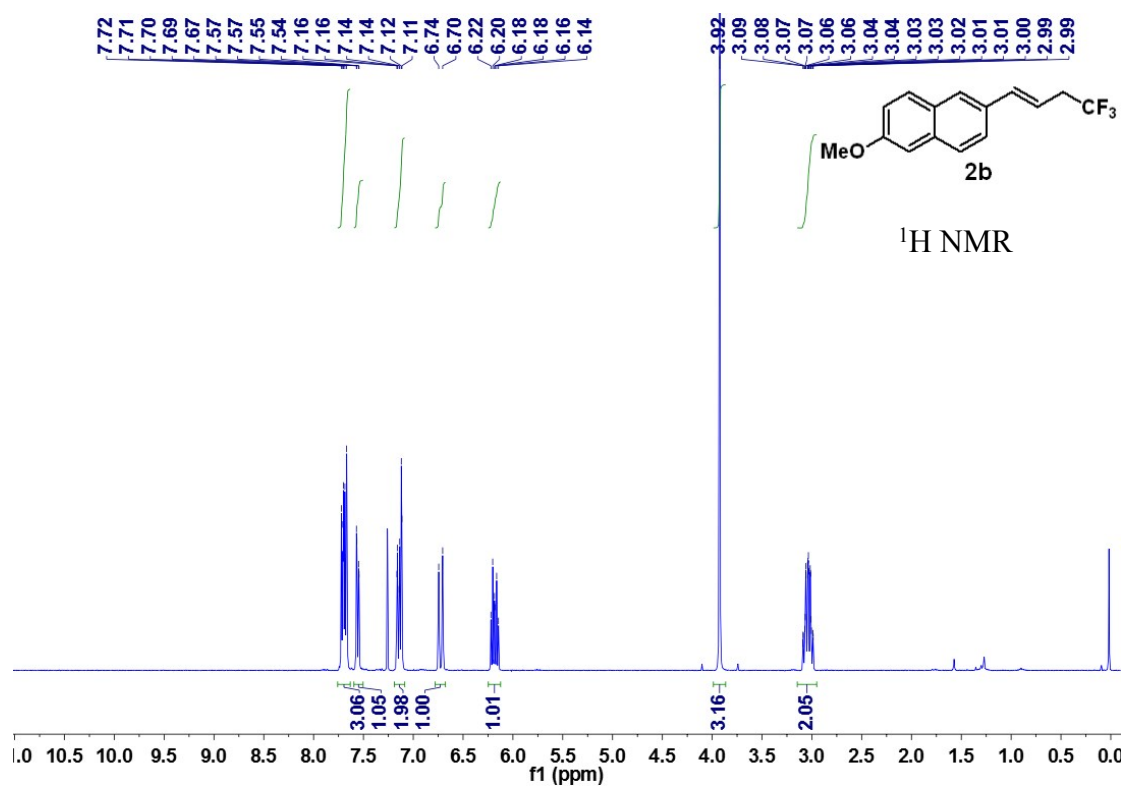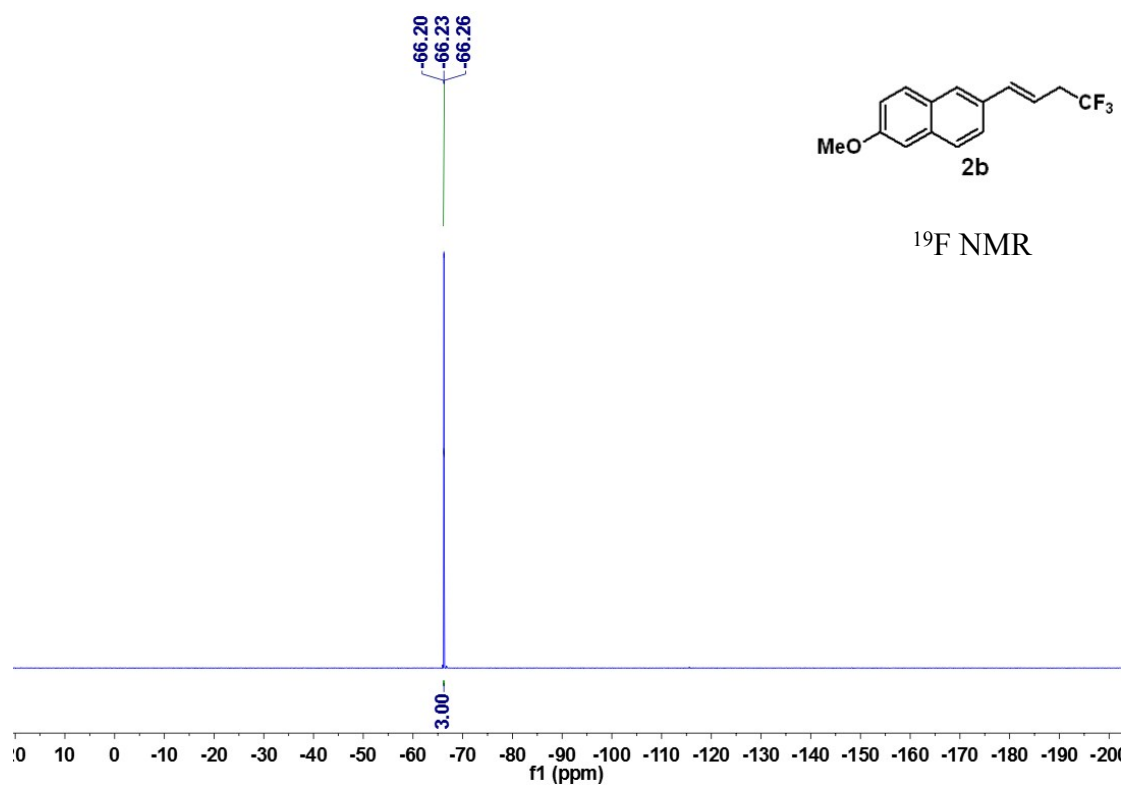

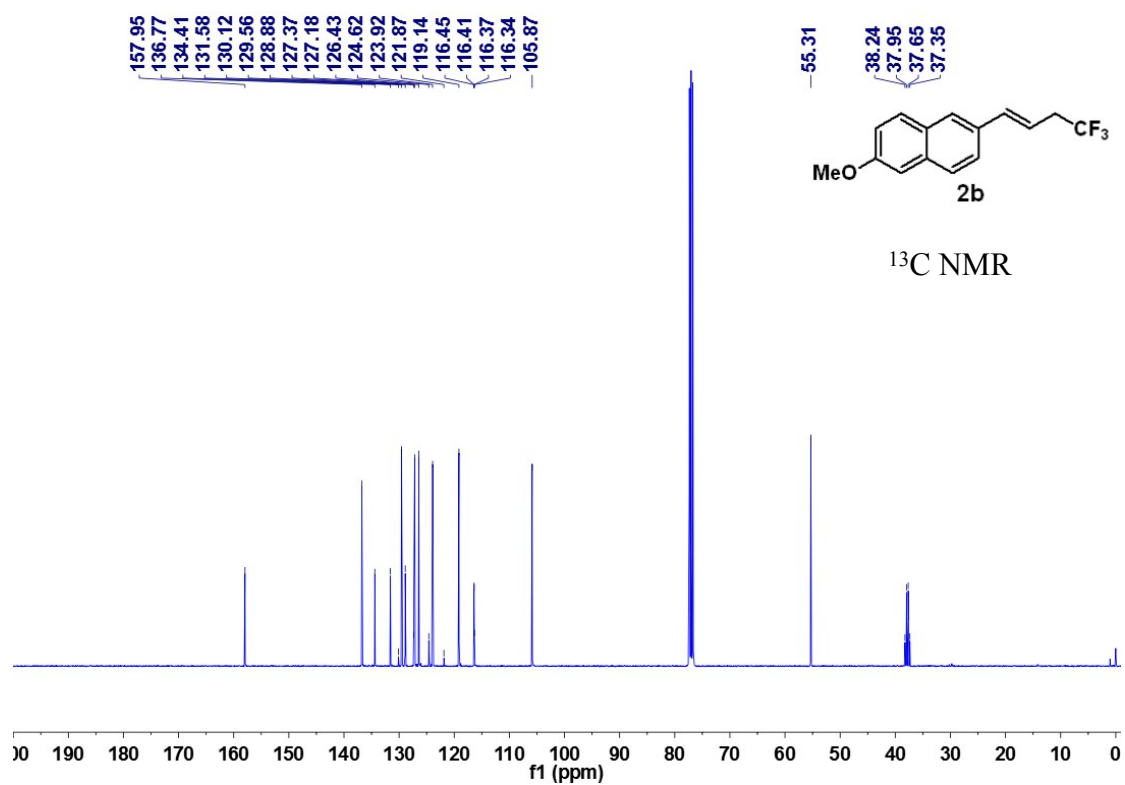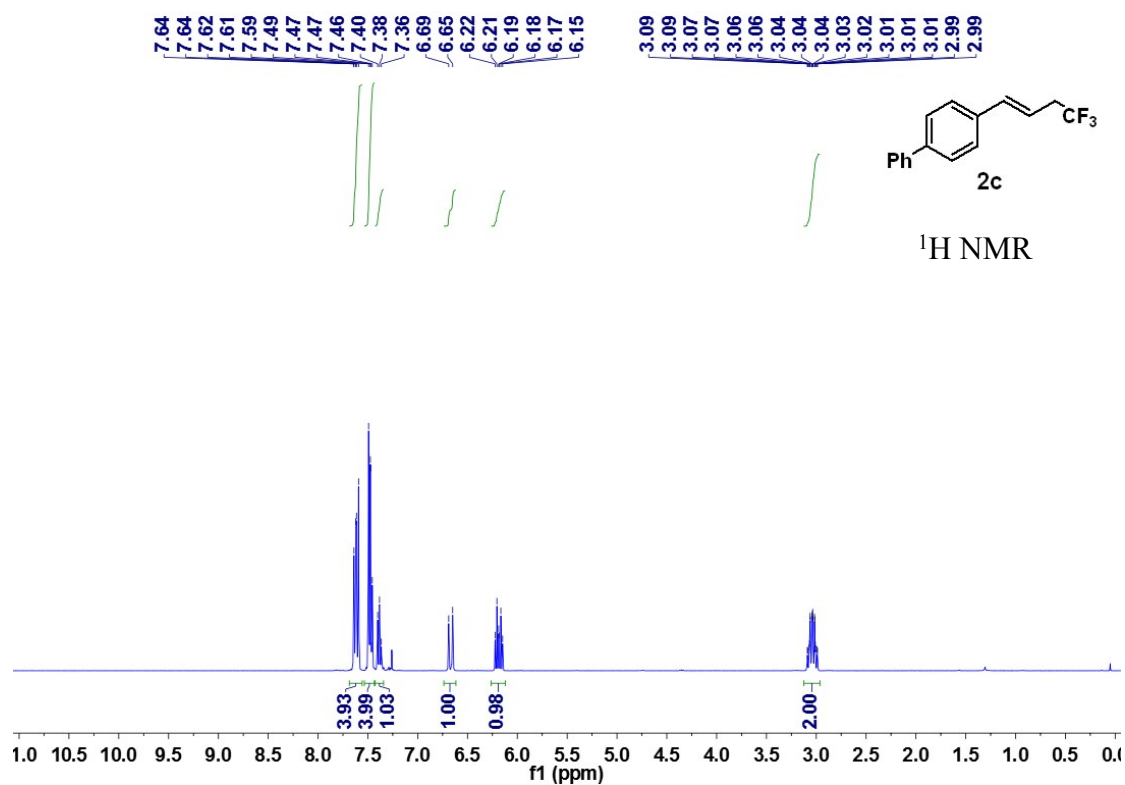

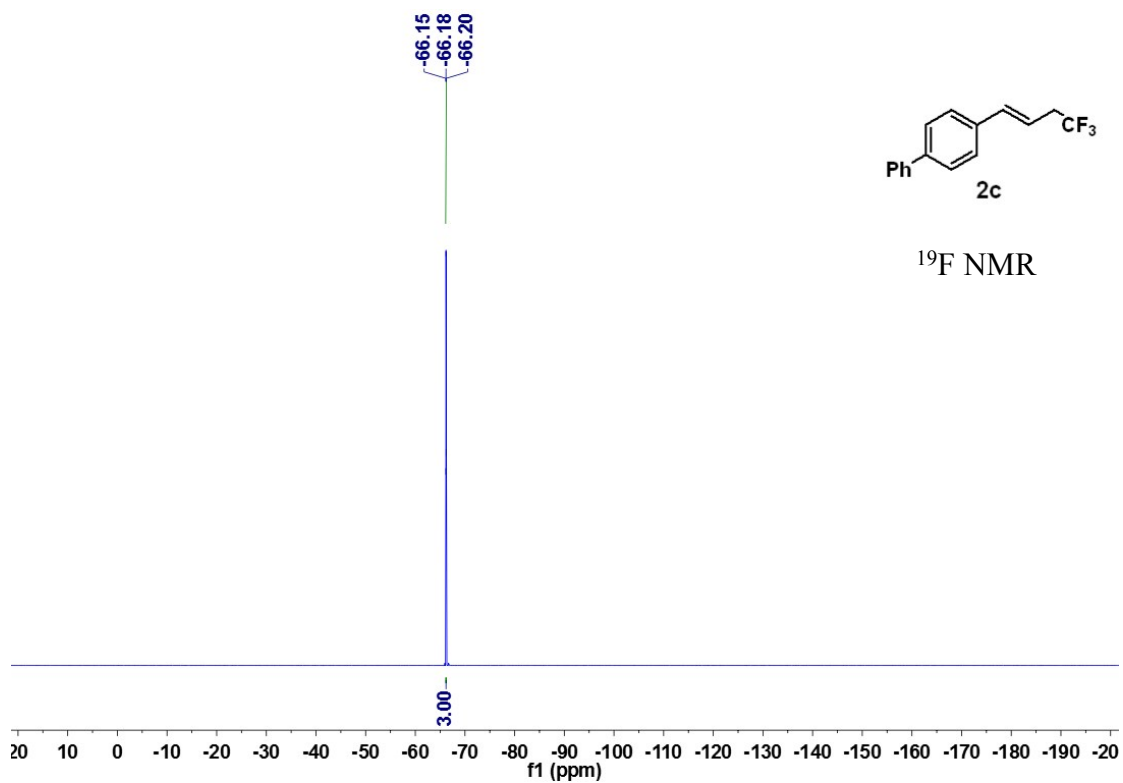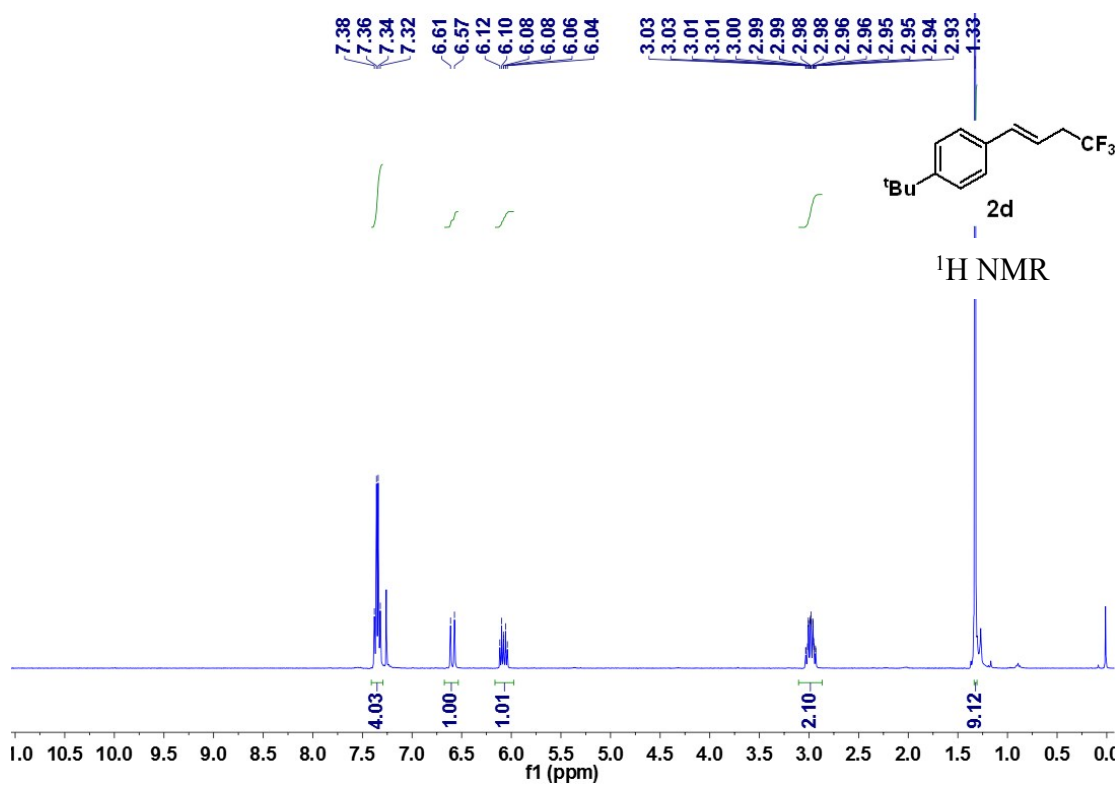

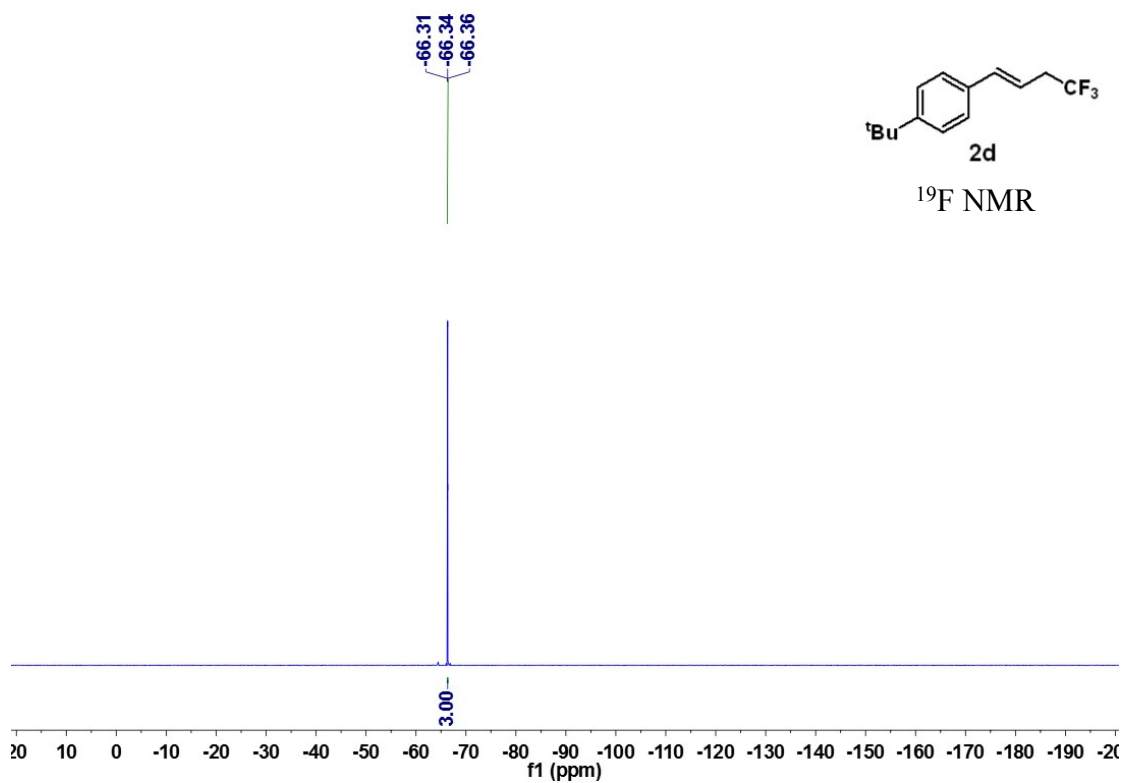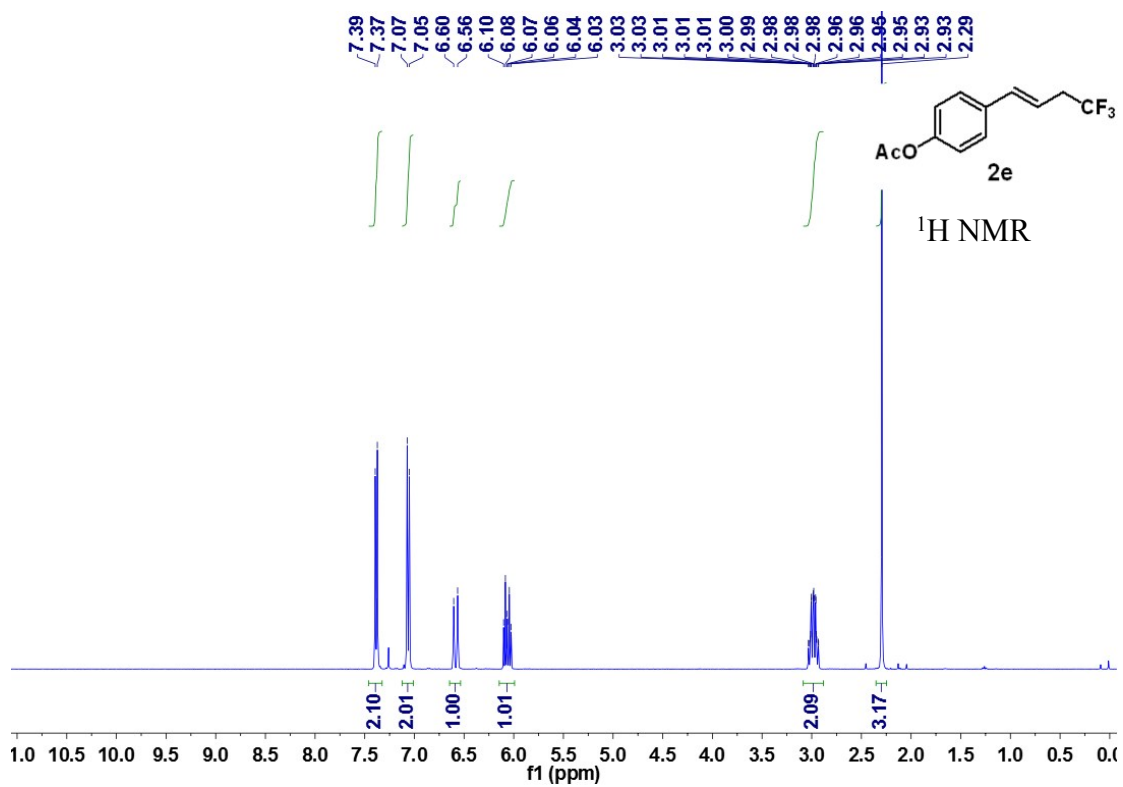

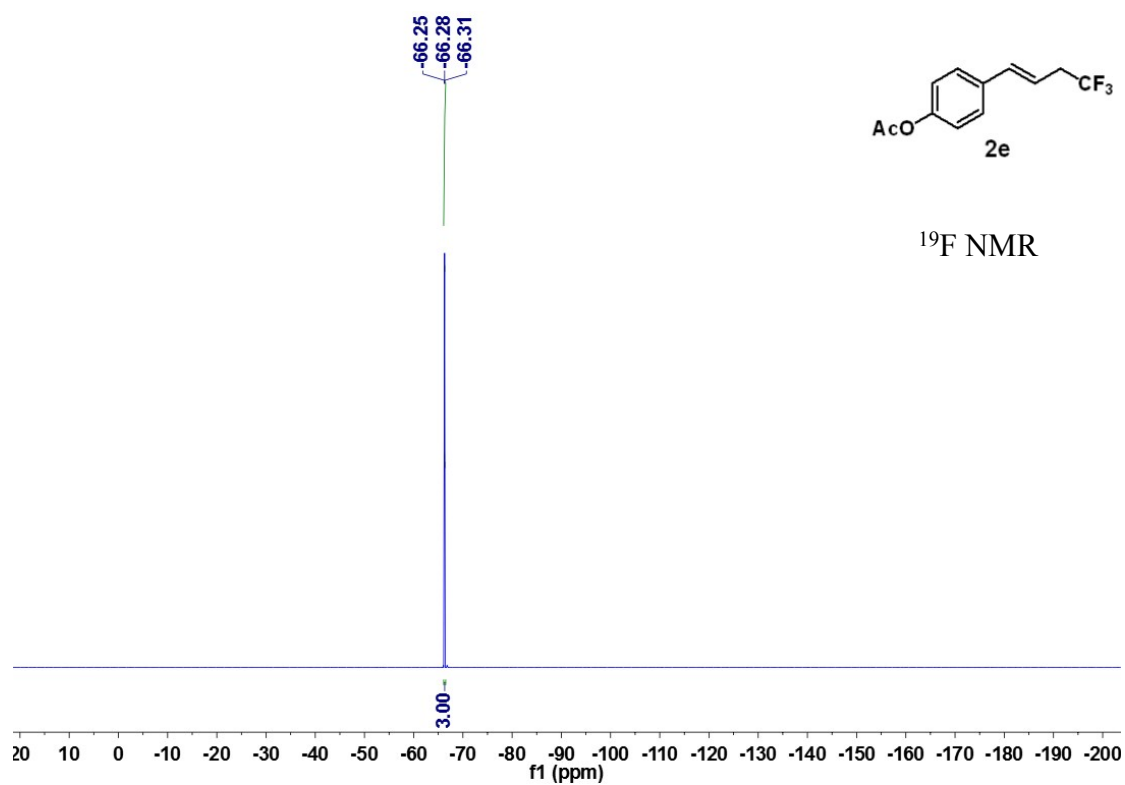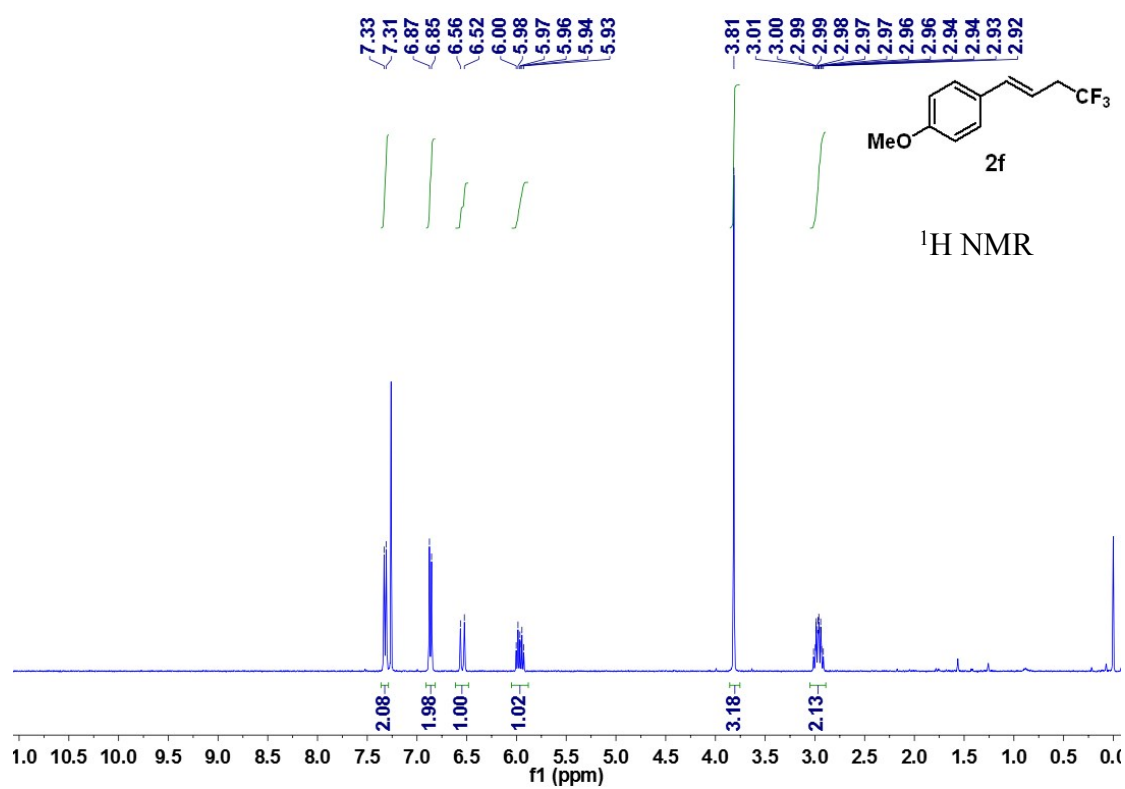

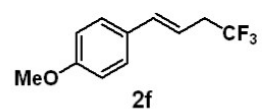

$^{19}\text{F}$  NMR

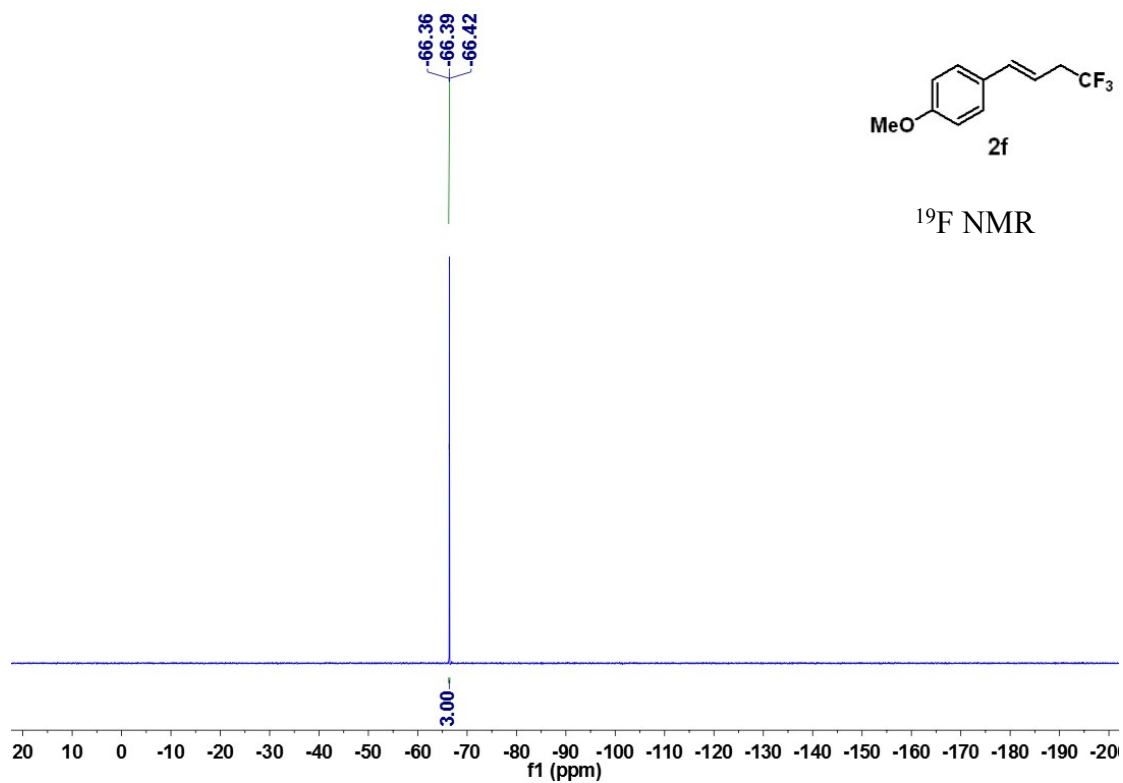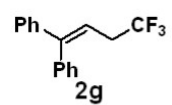

$^1\text{H}$  NMR

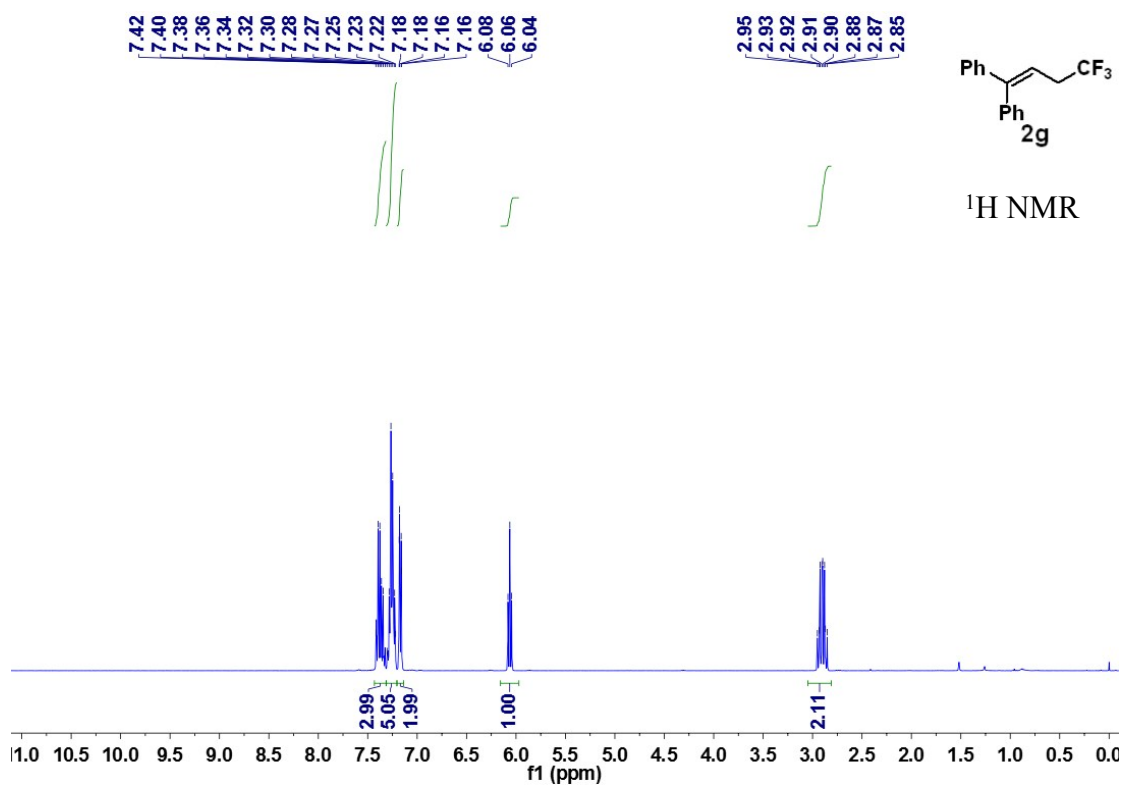

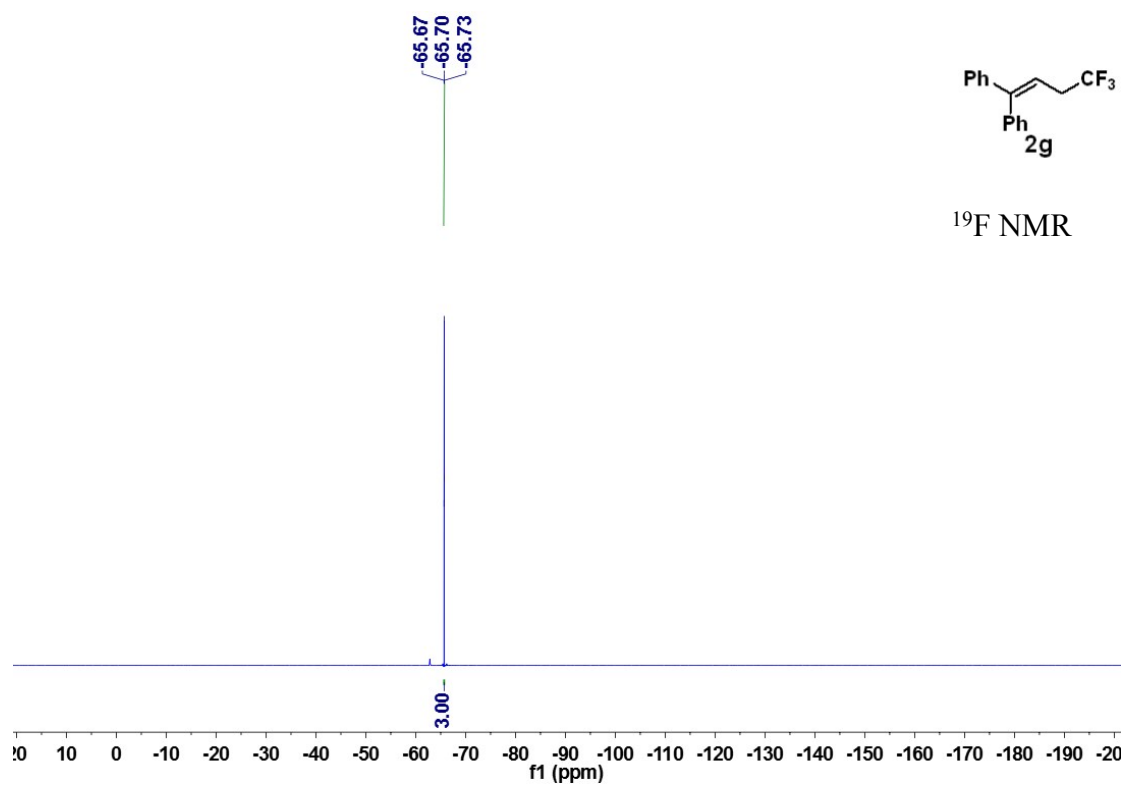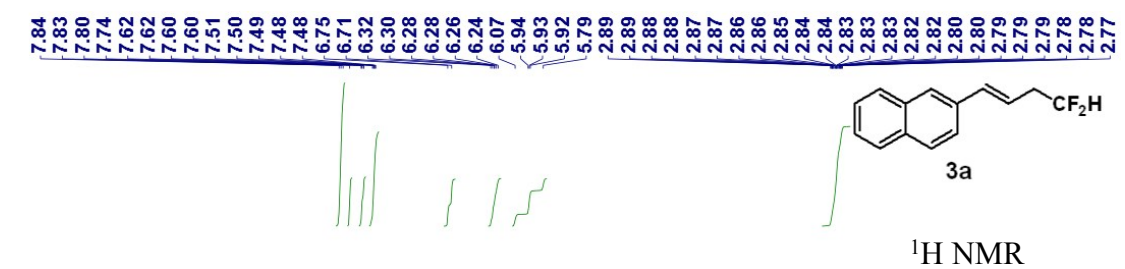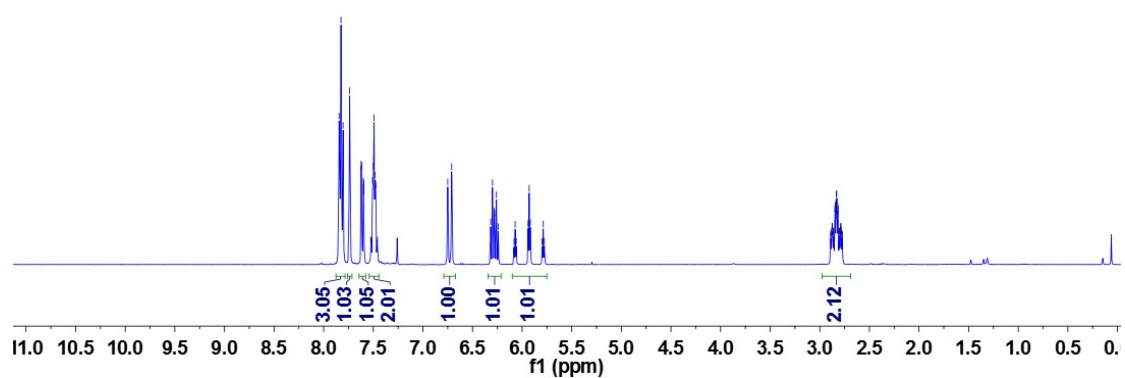

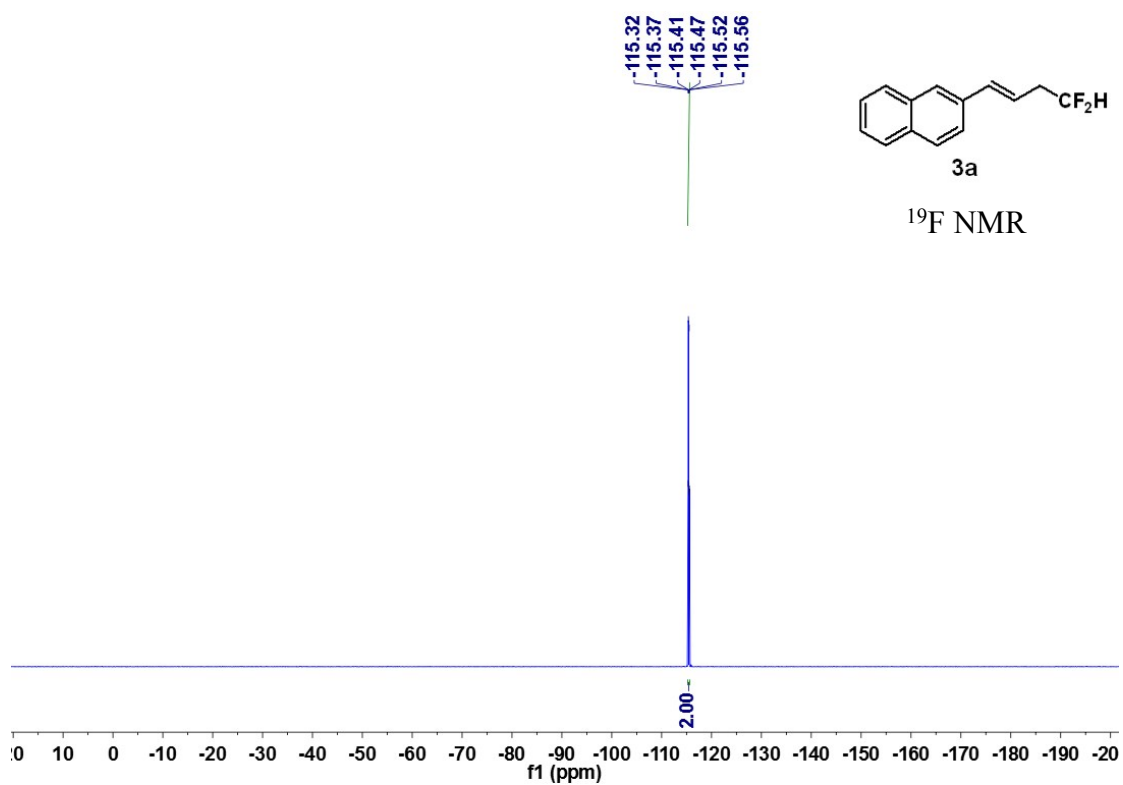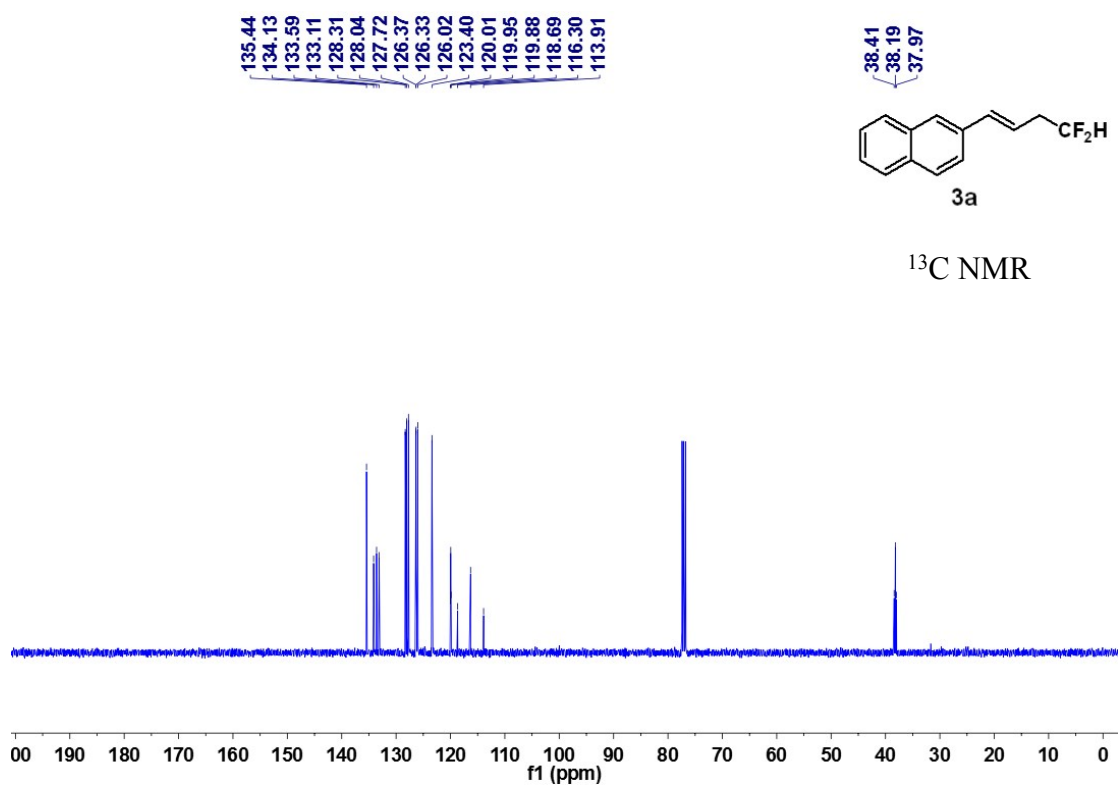

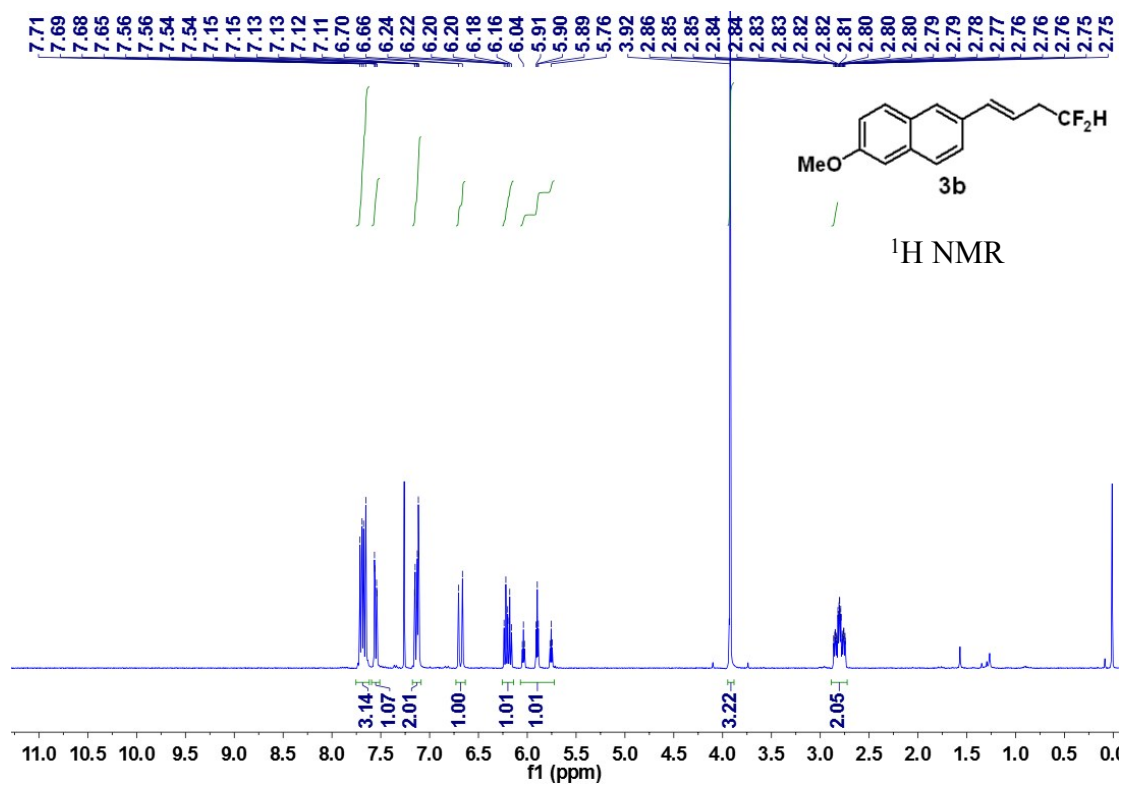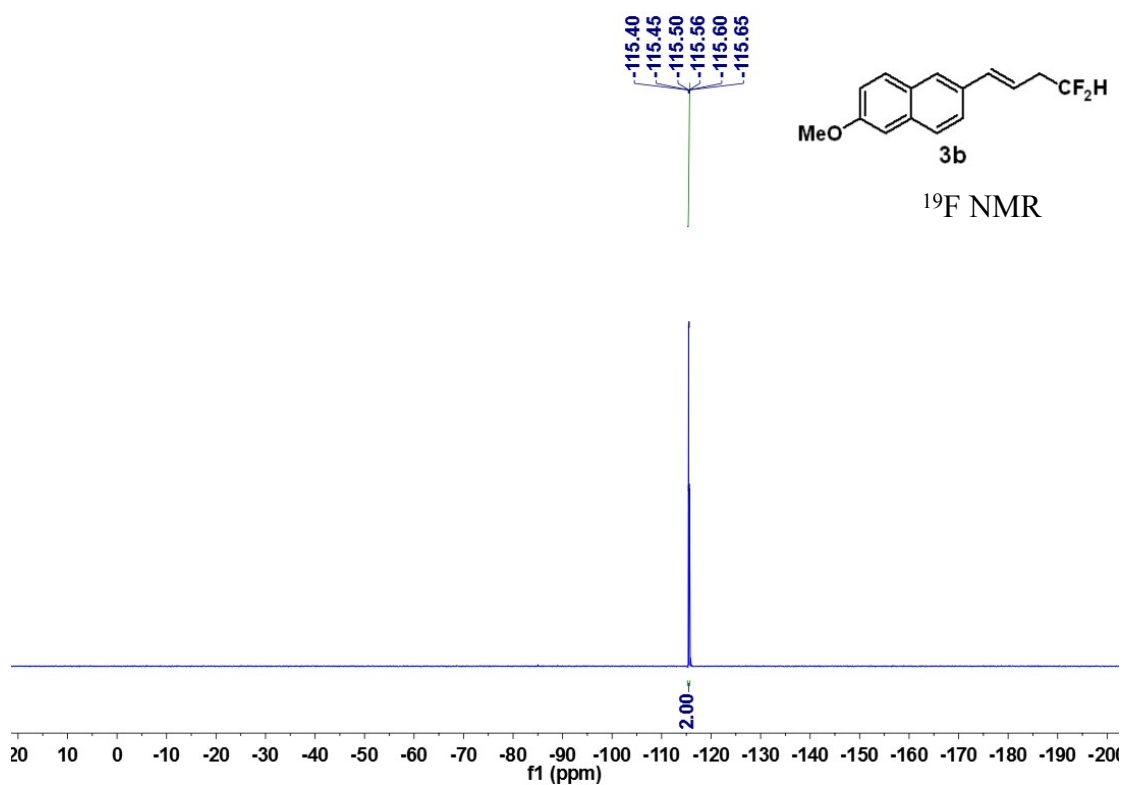

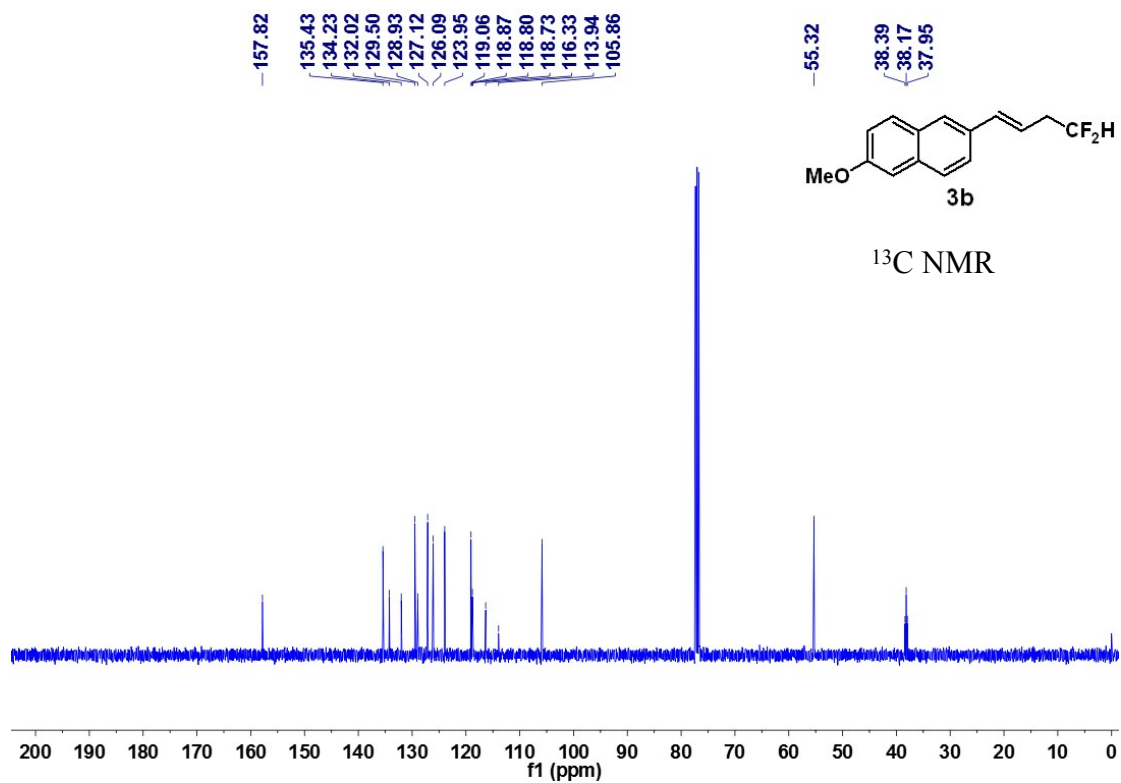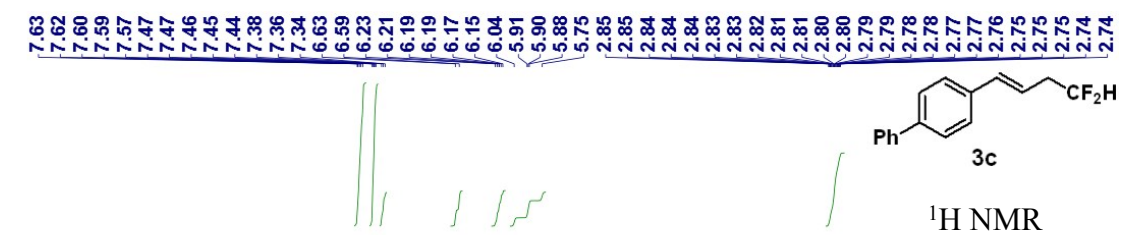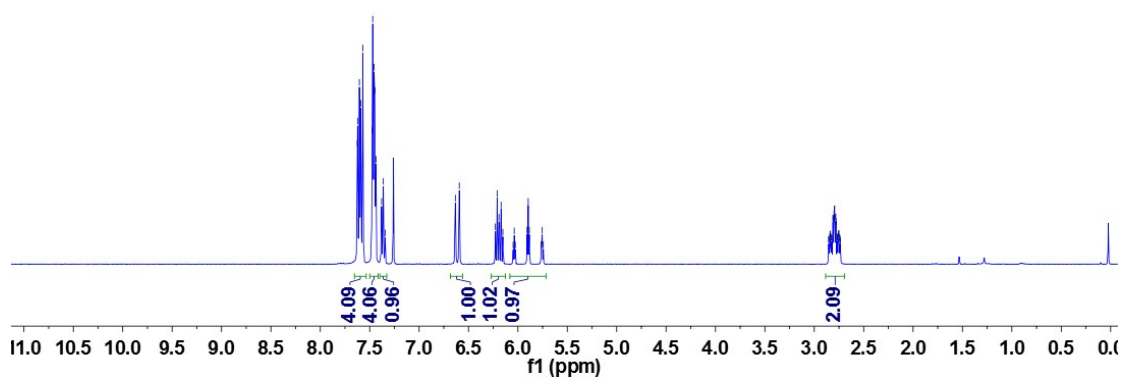

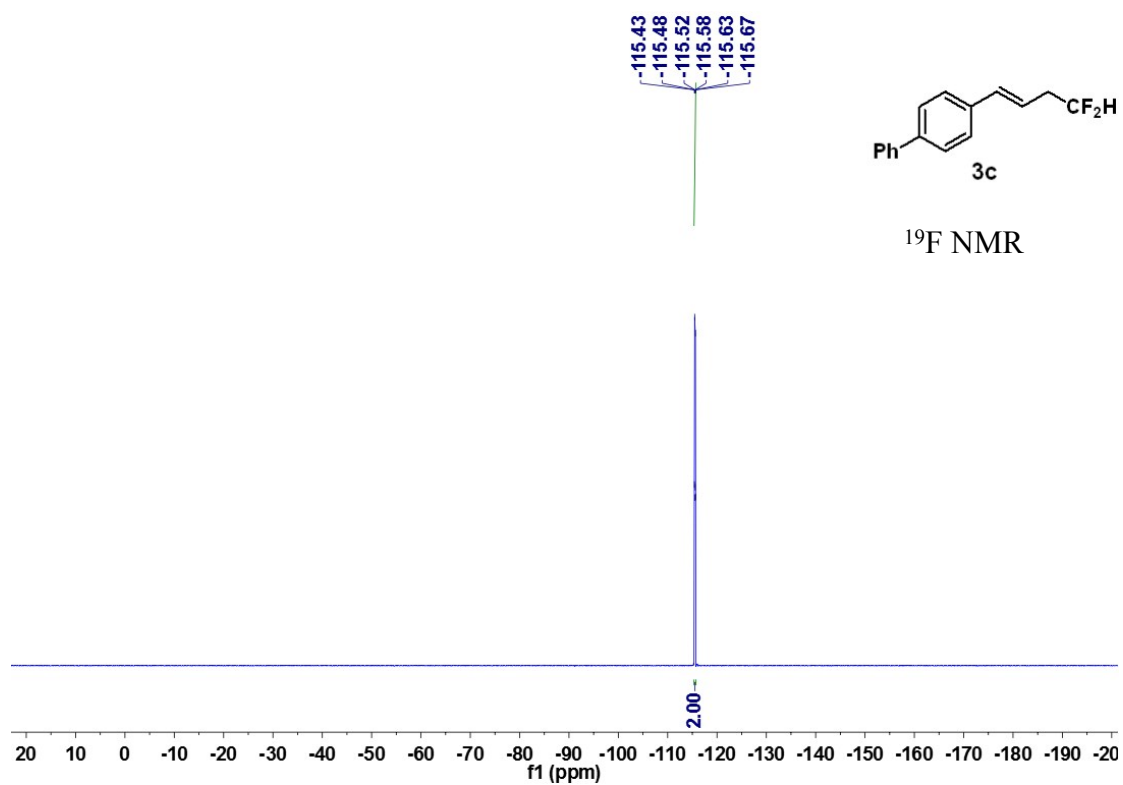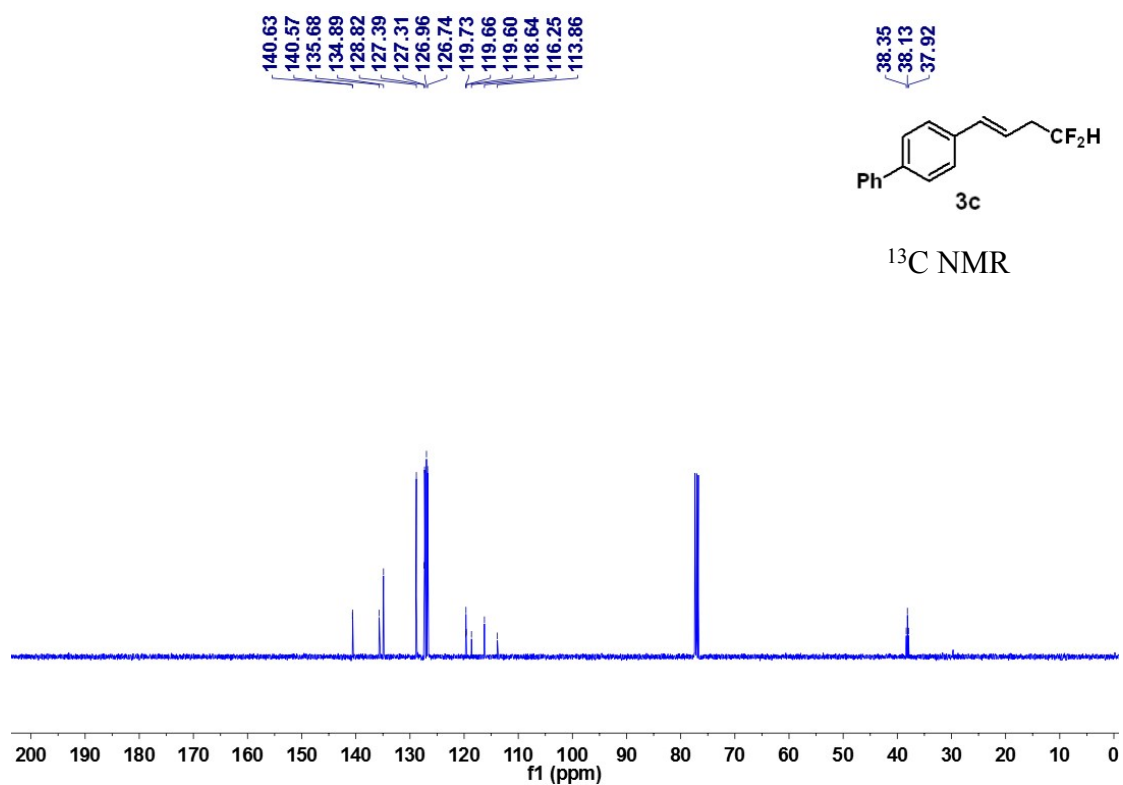

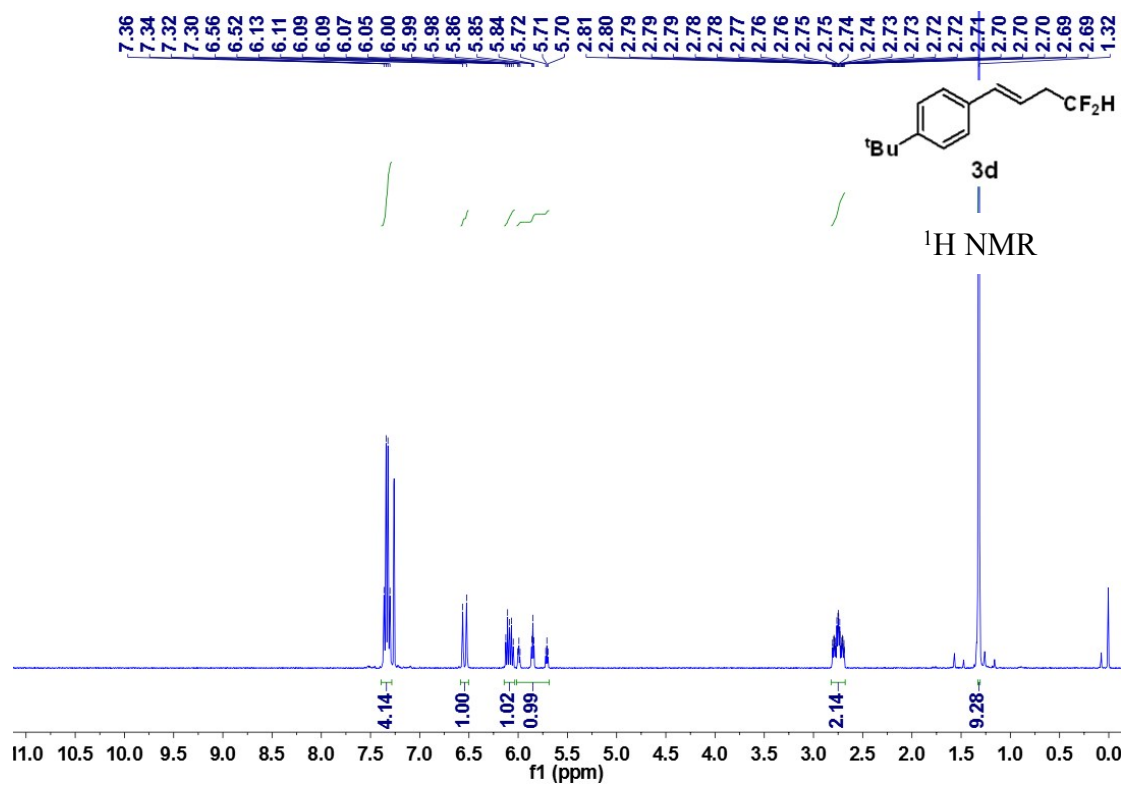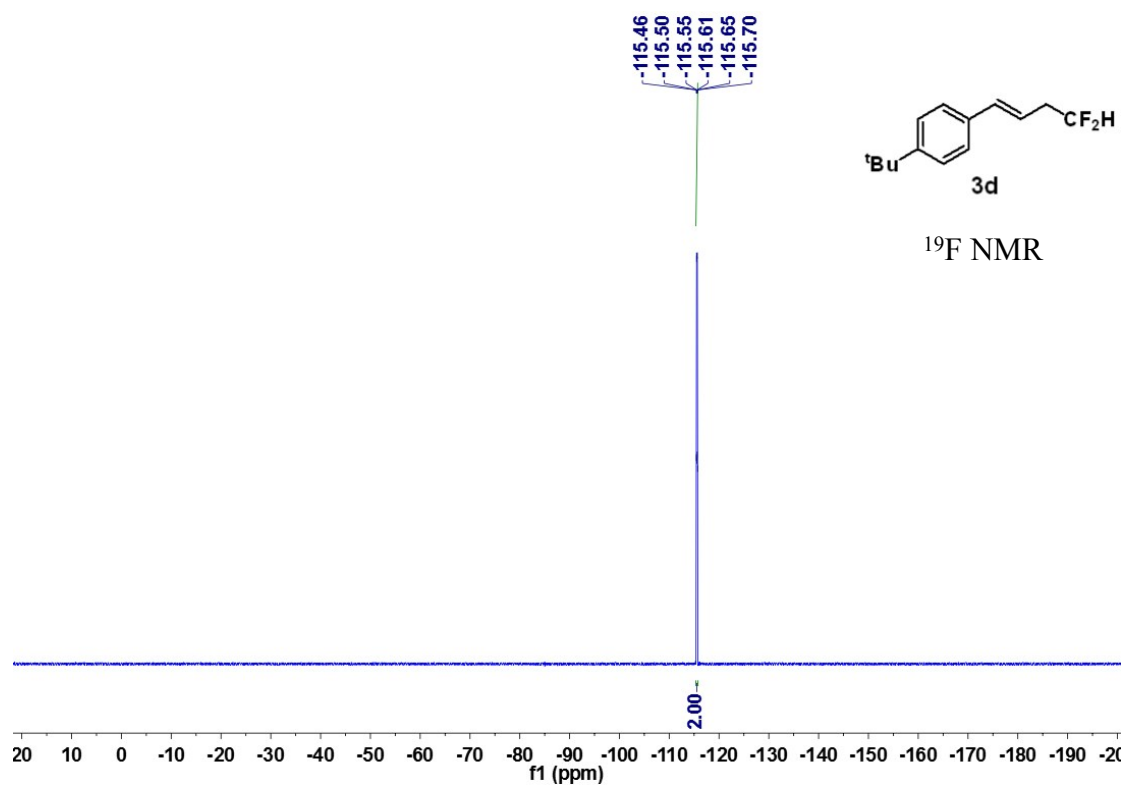

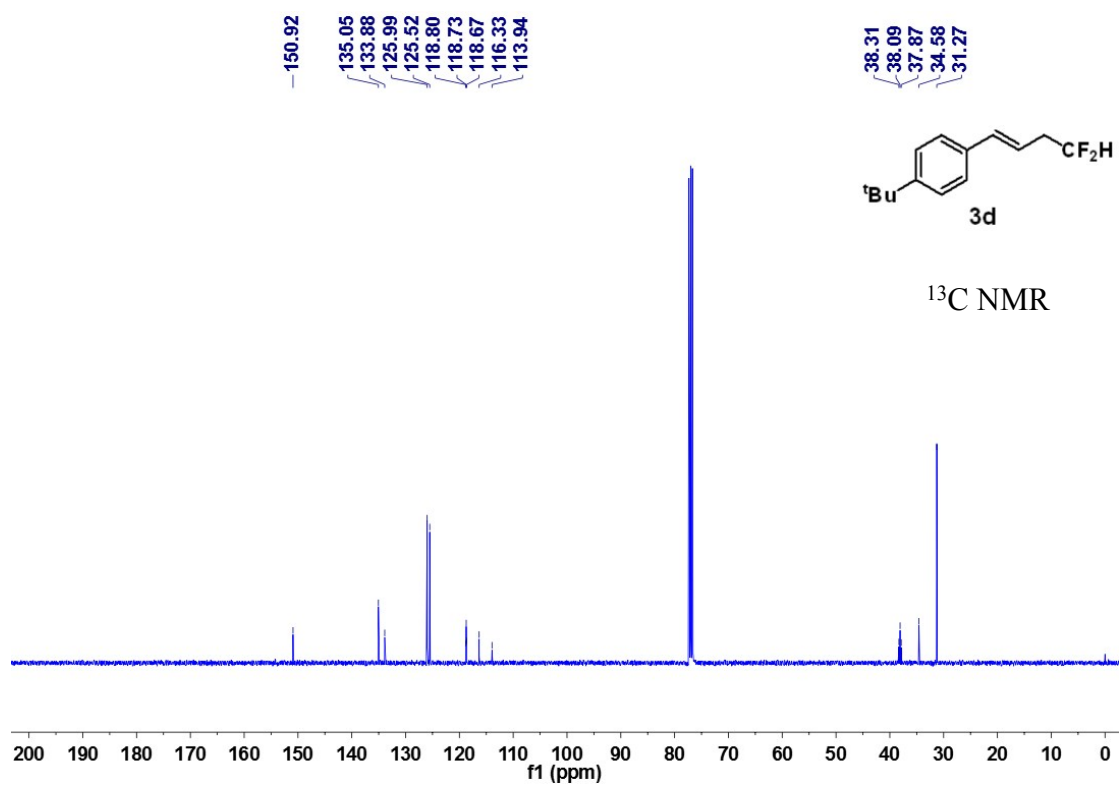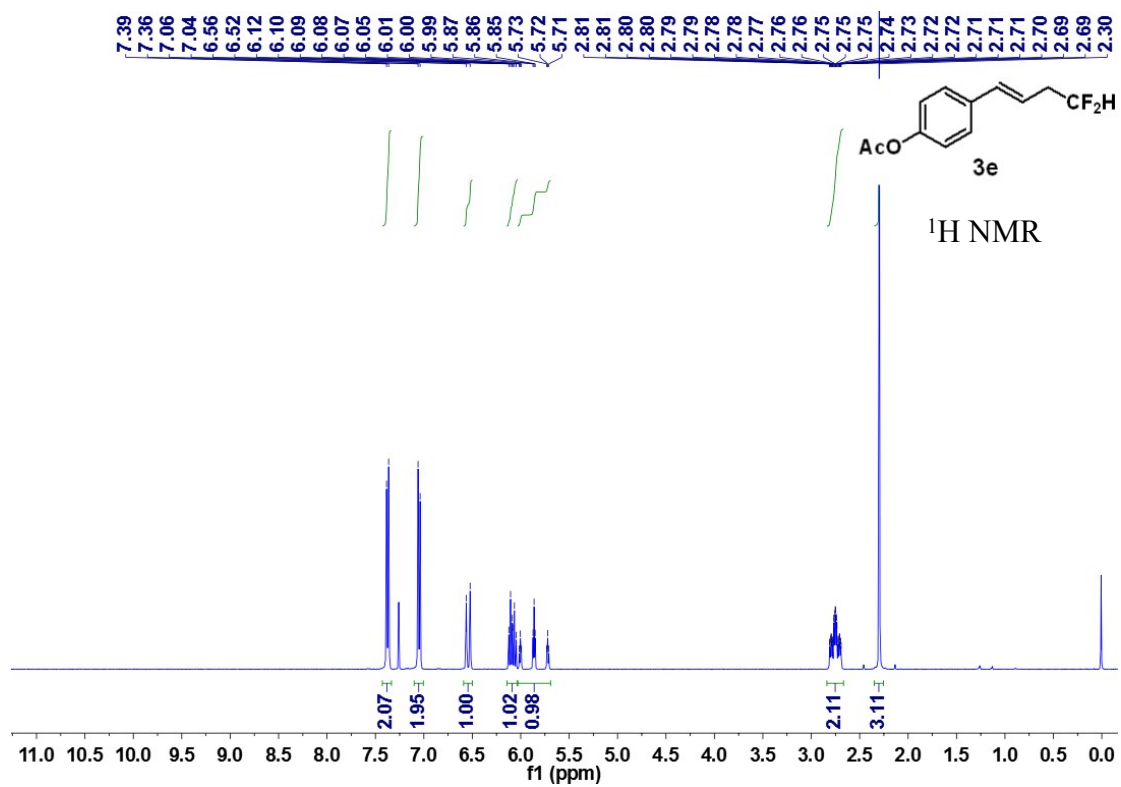

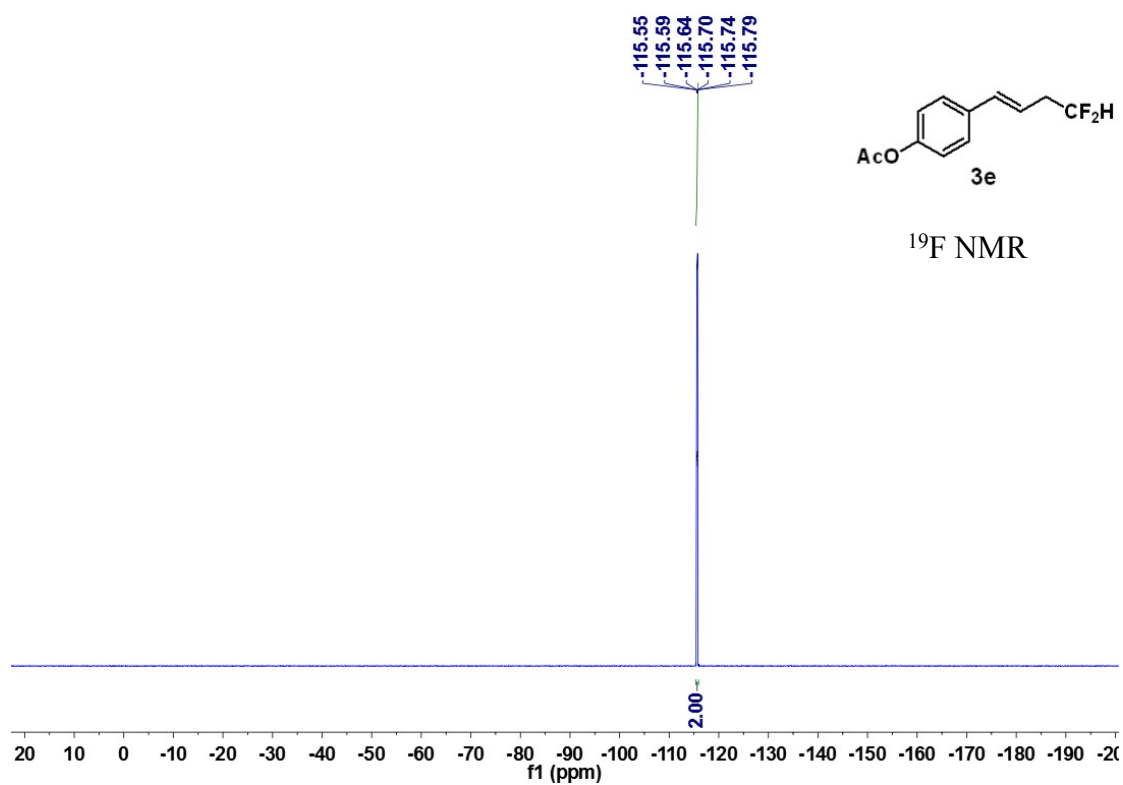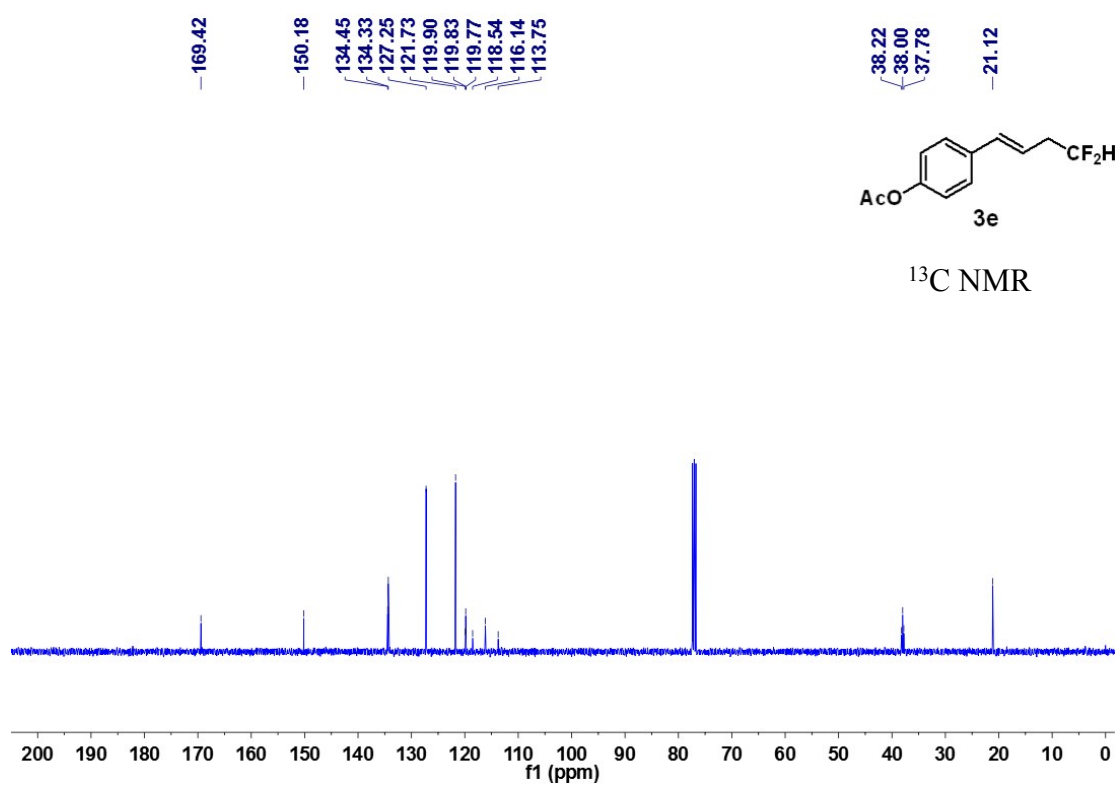

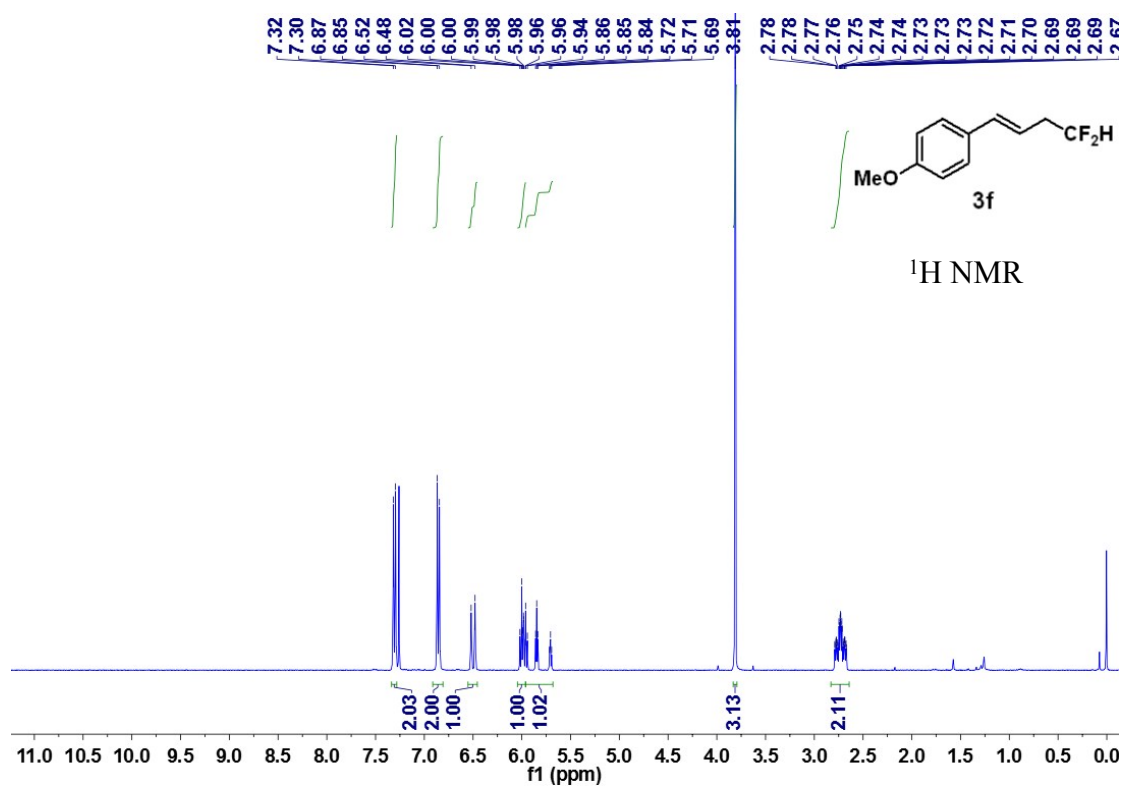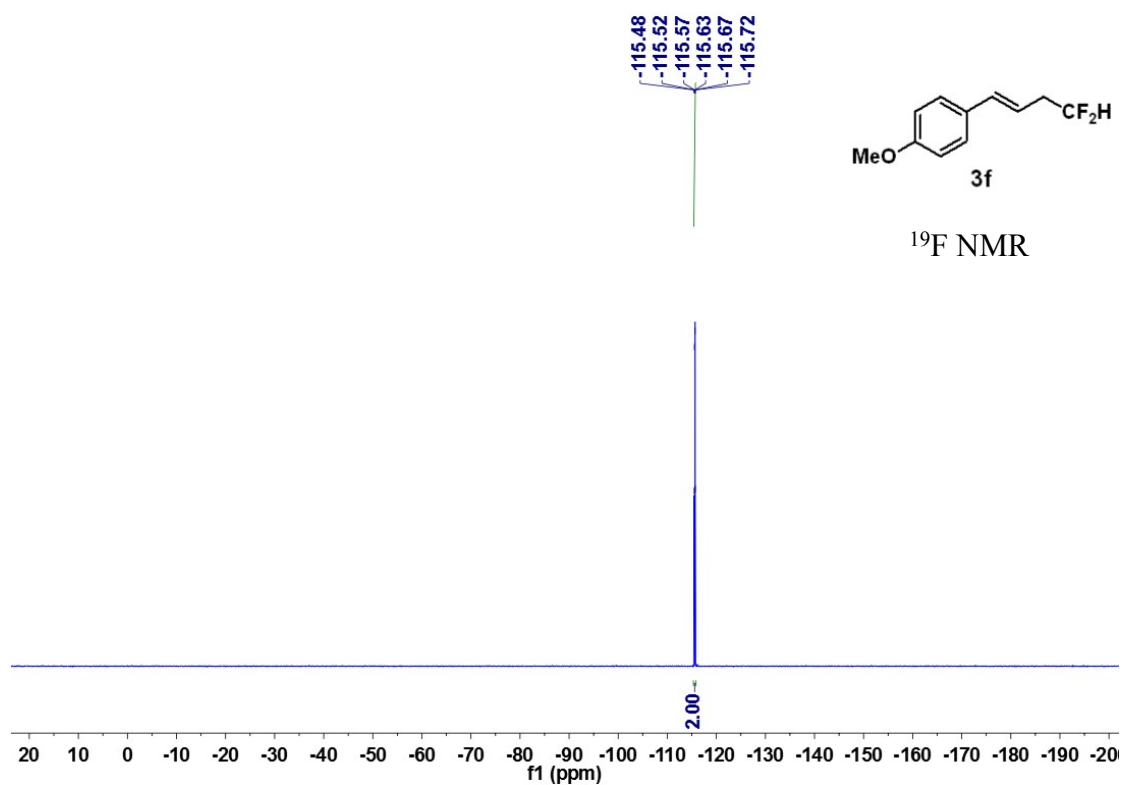

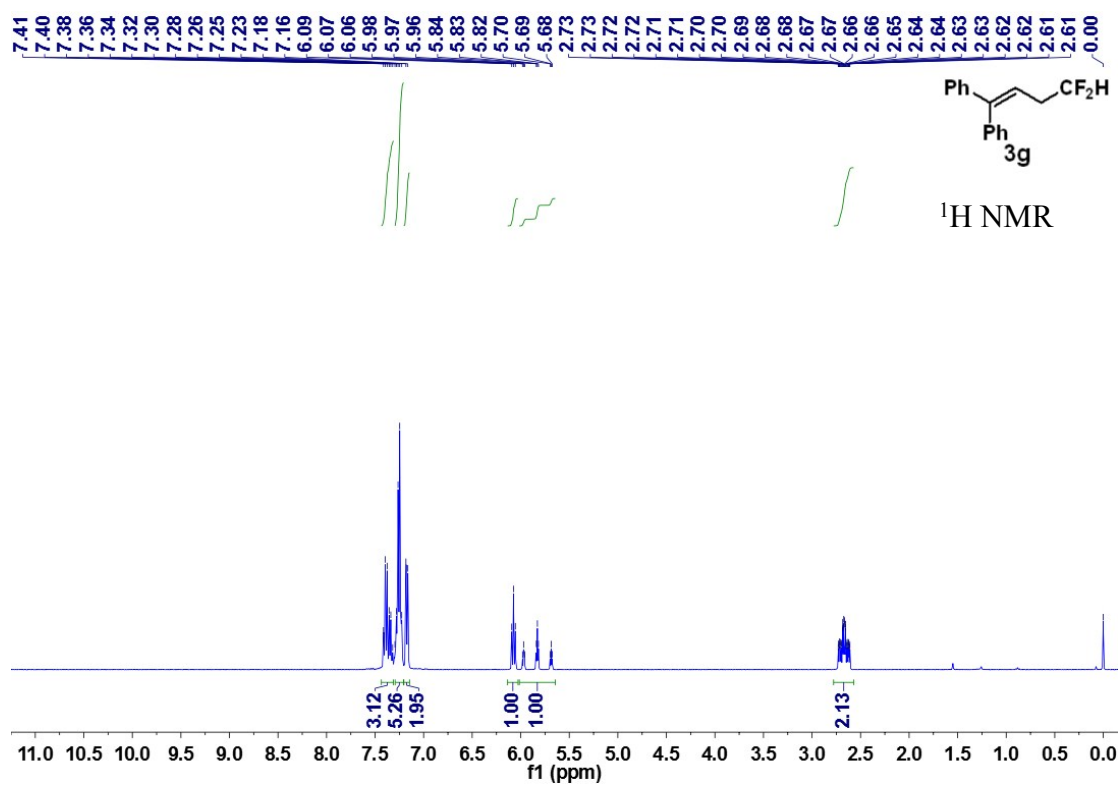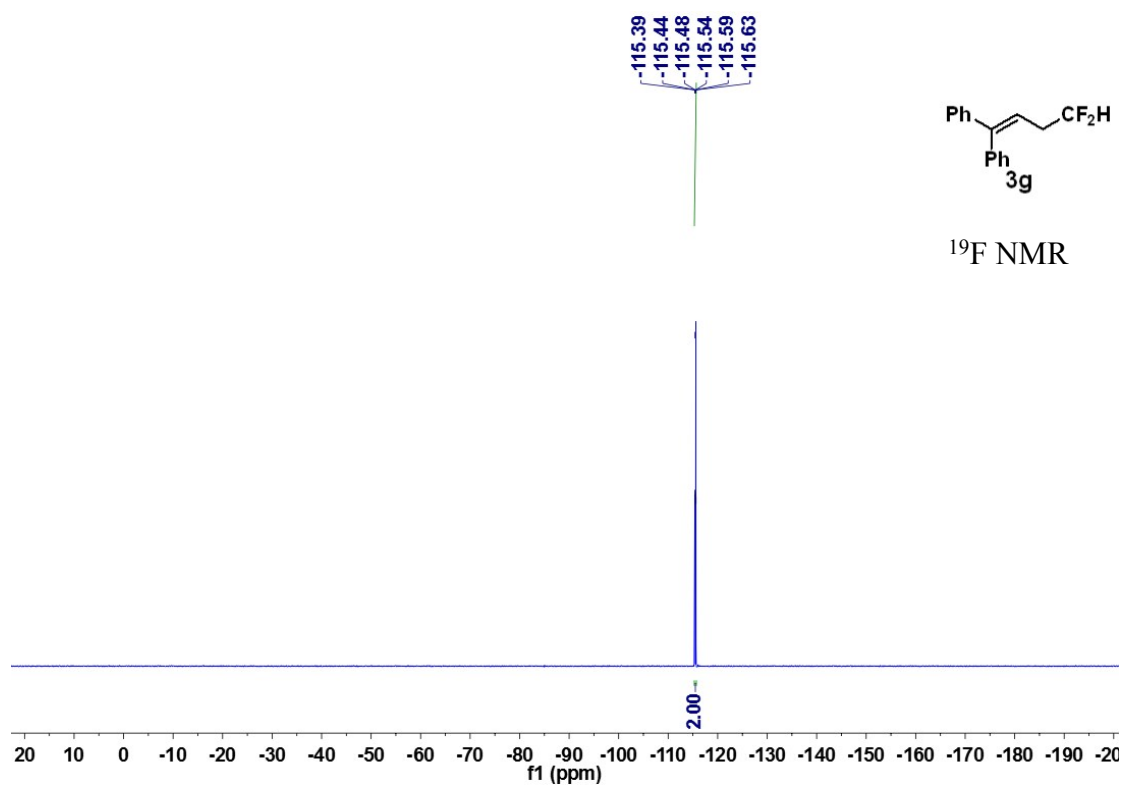

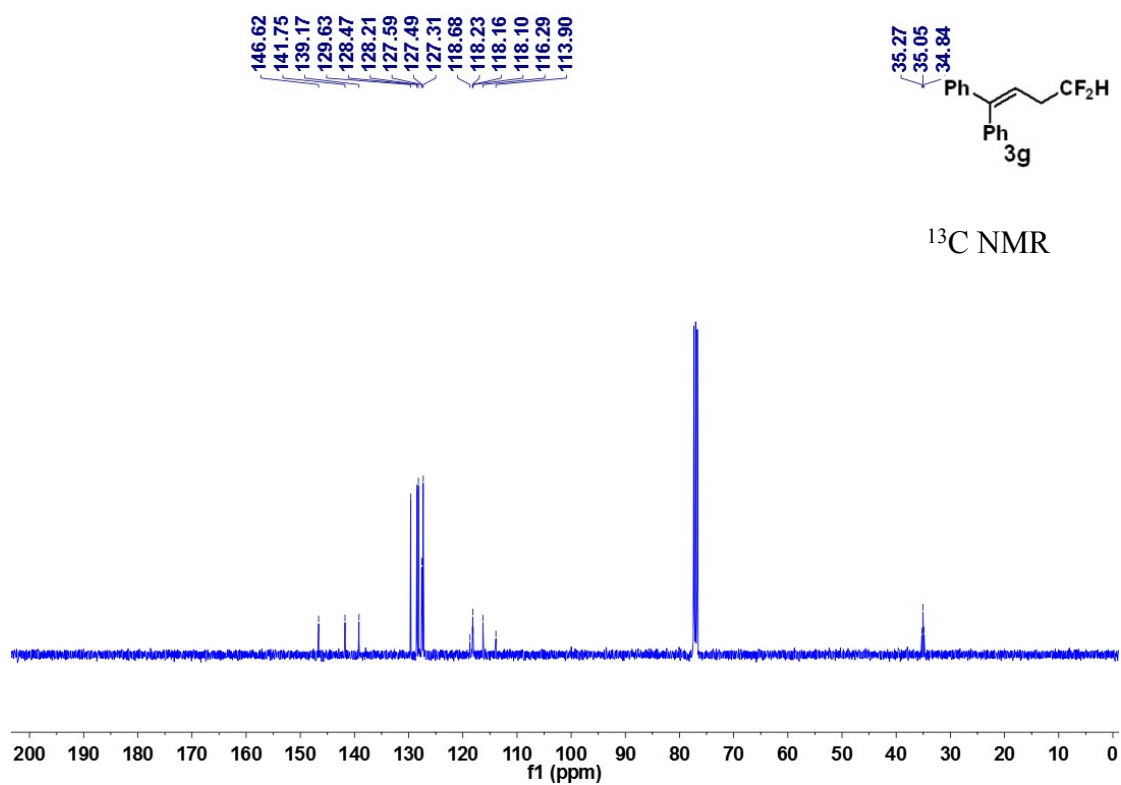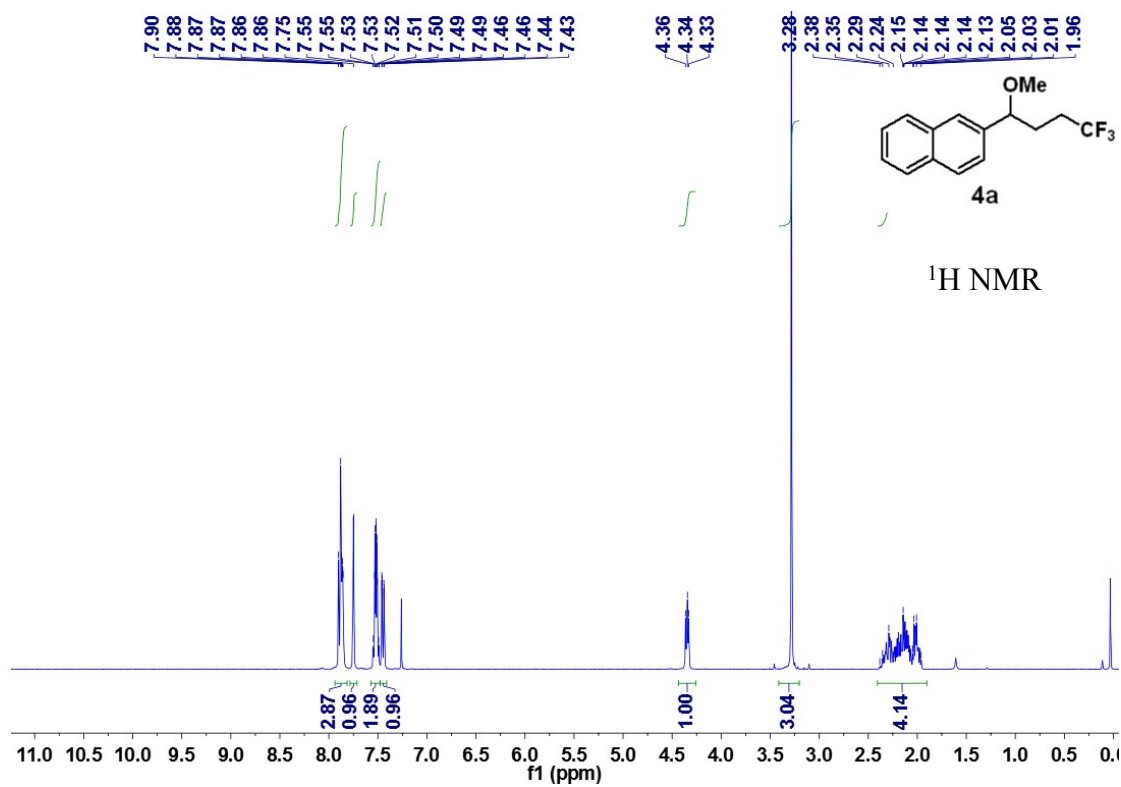

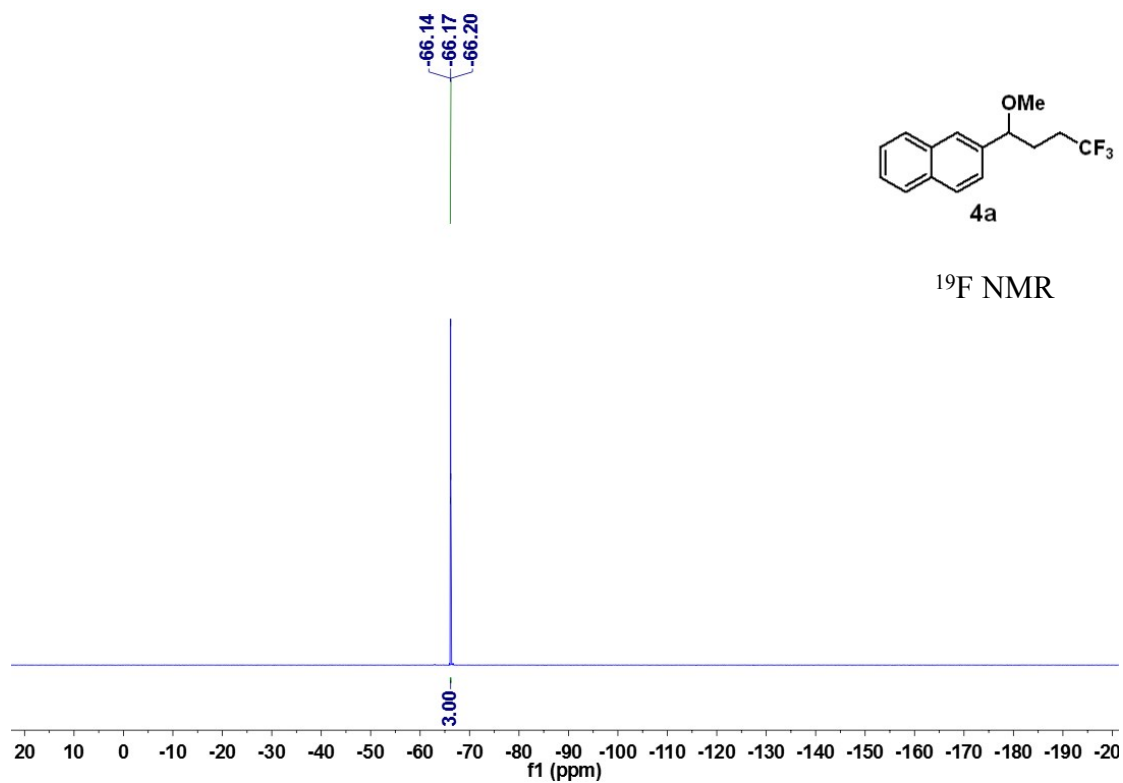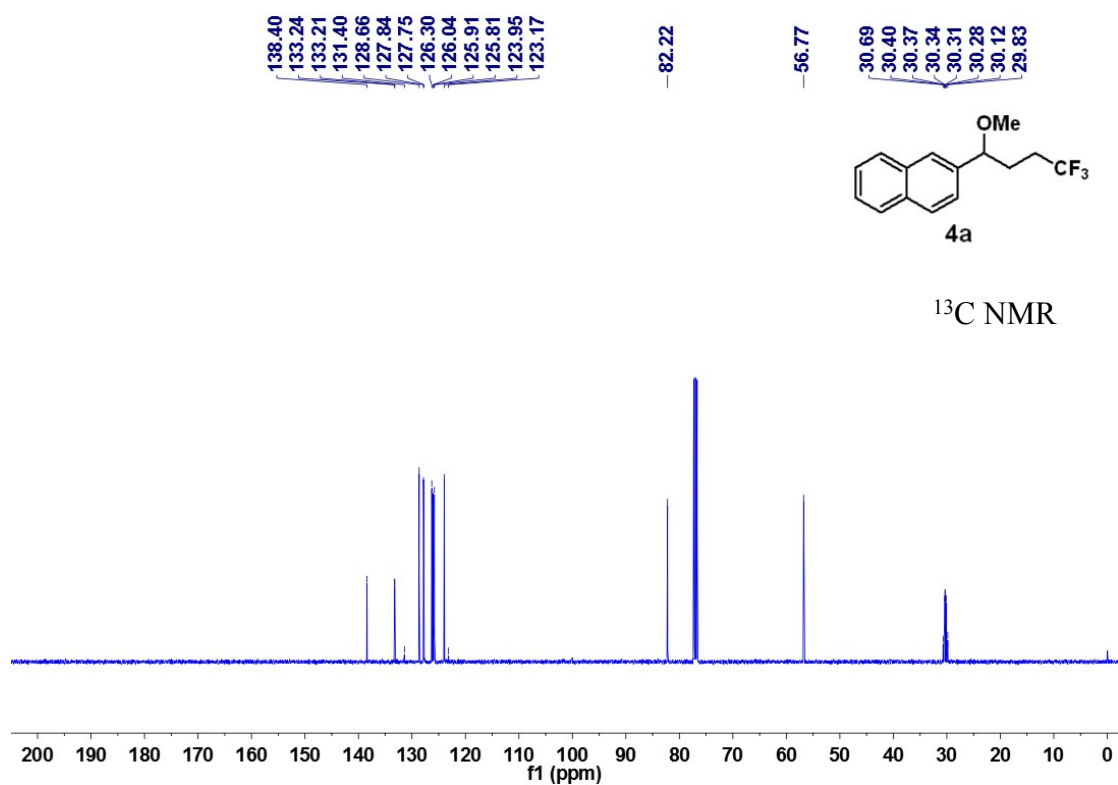

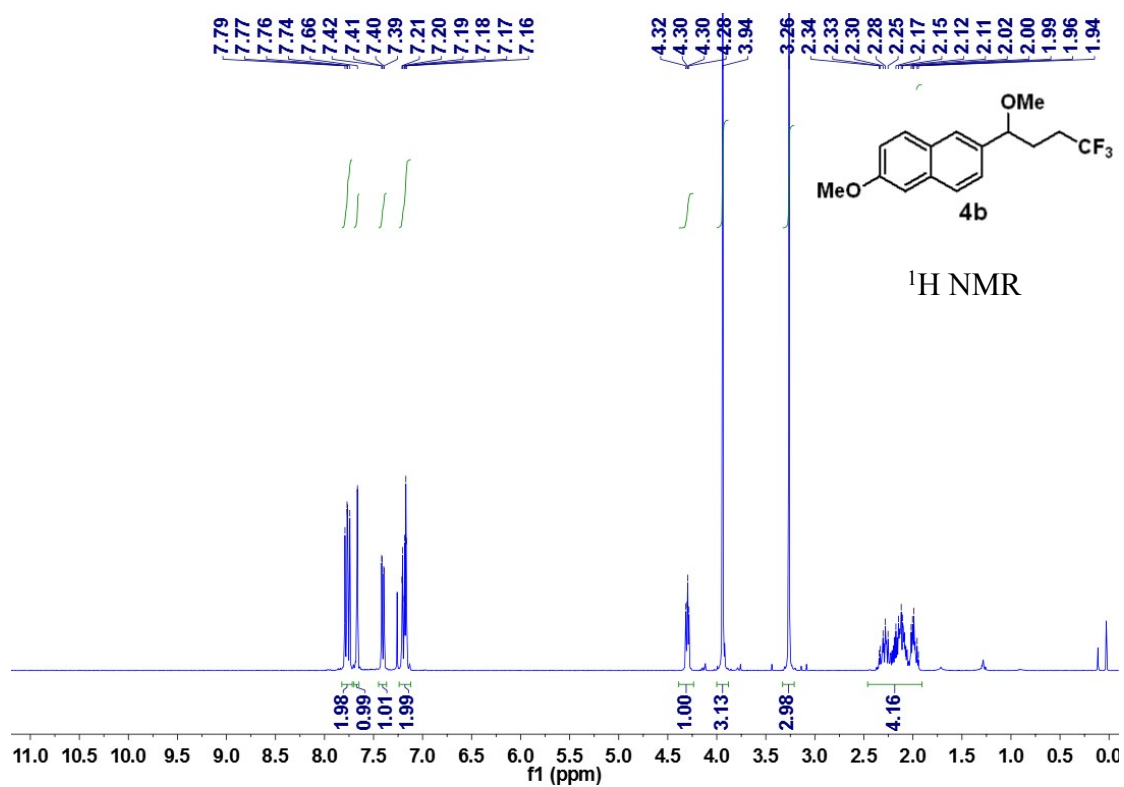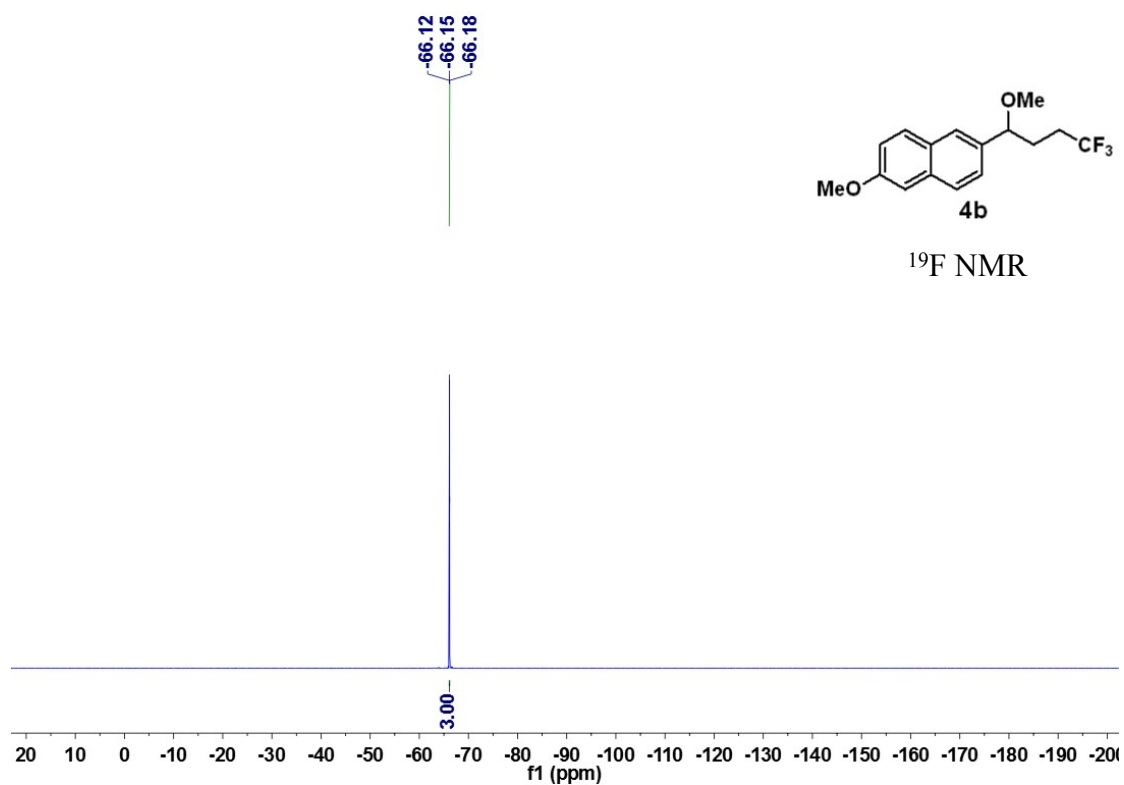

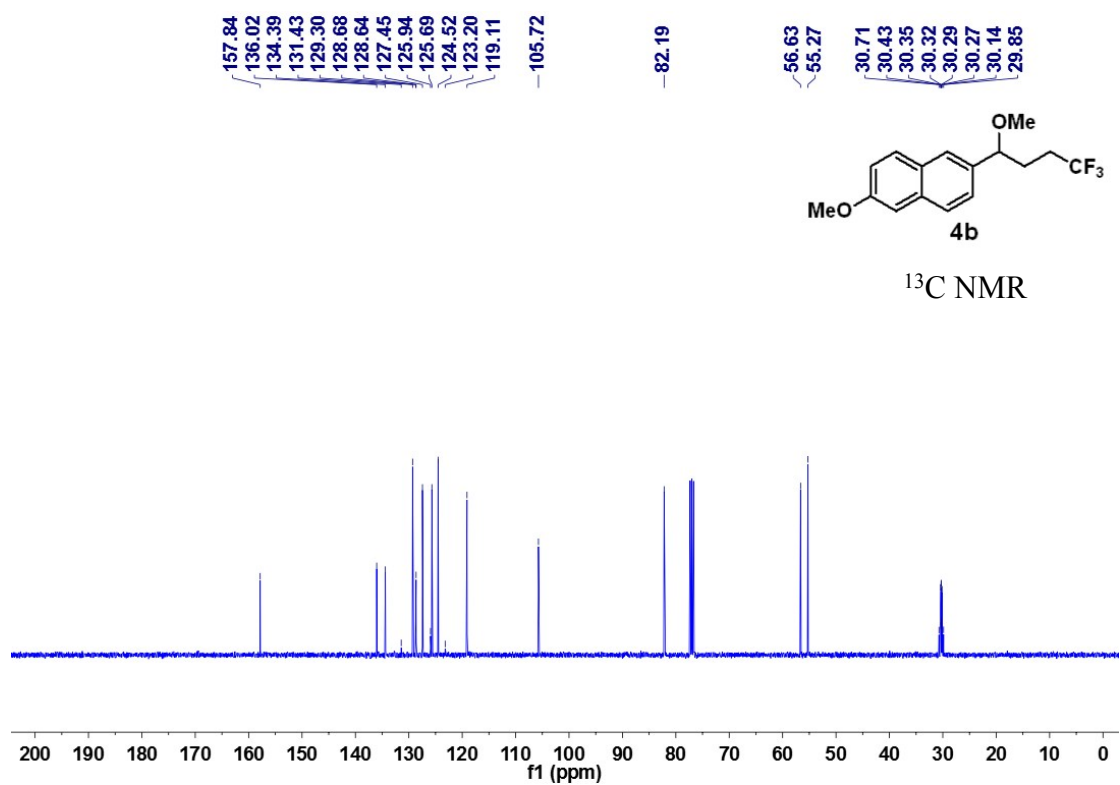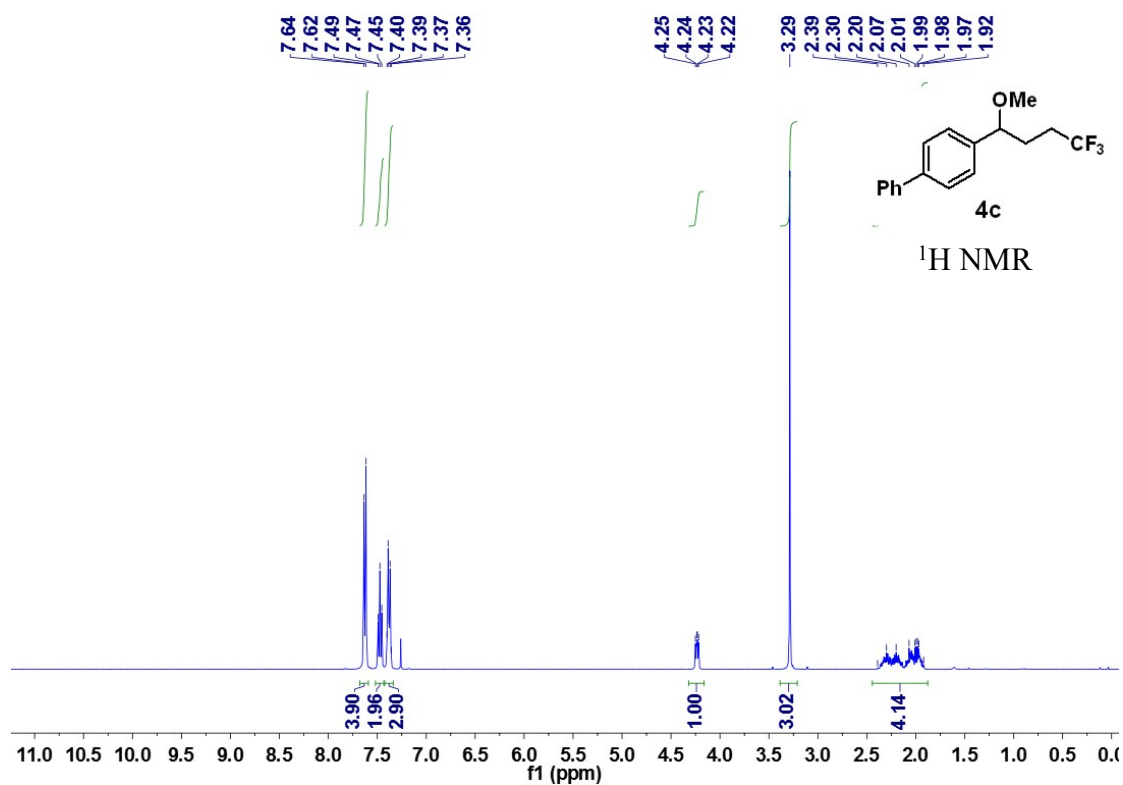

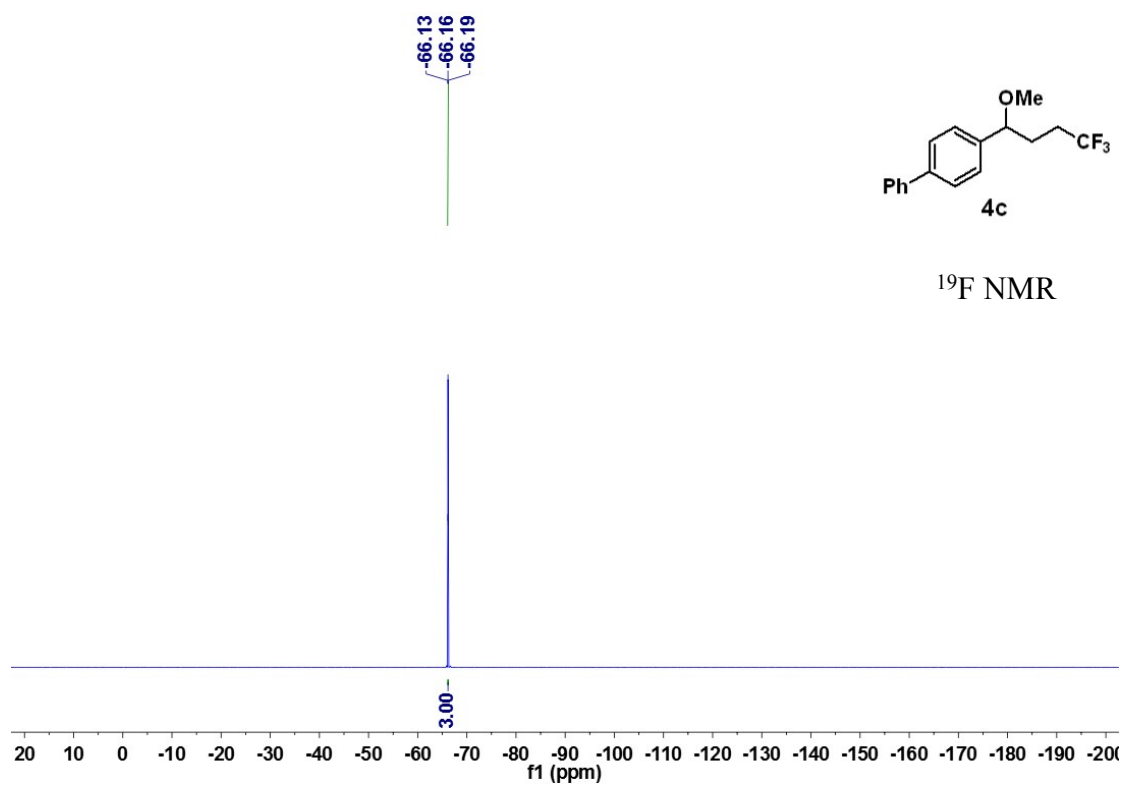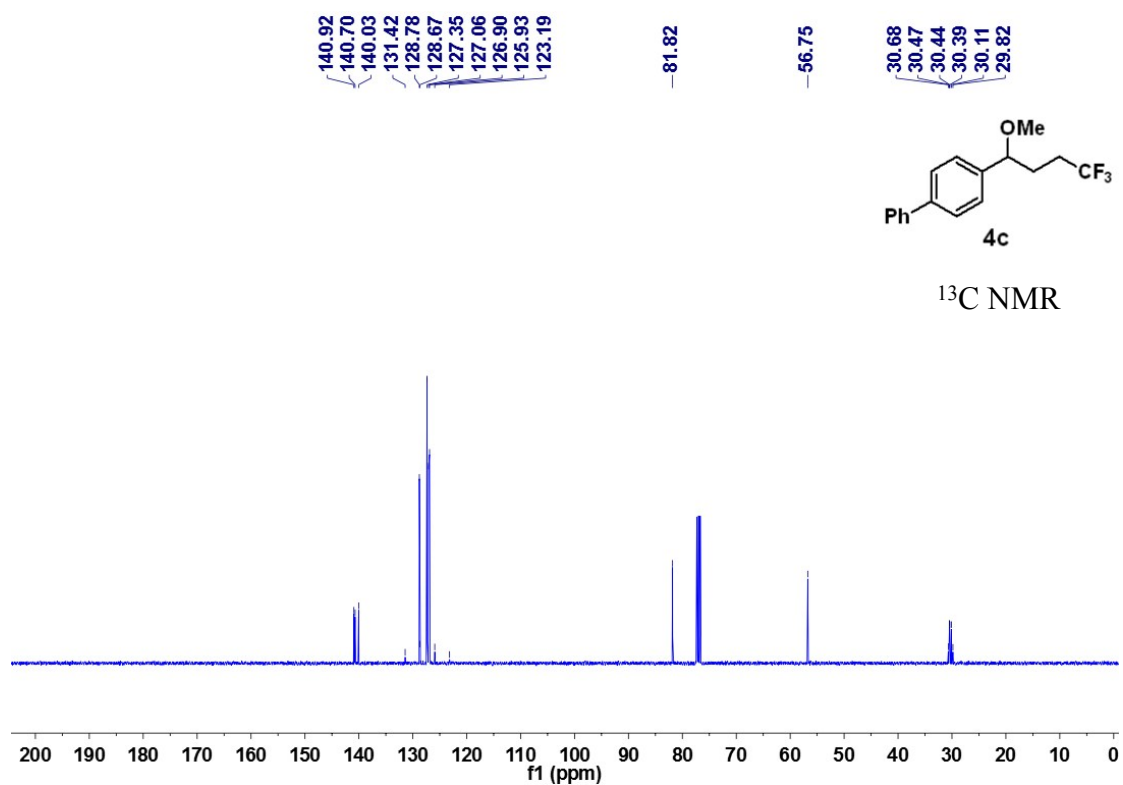

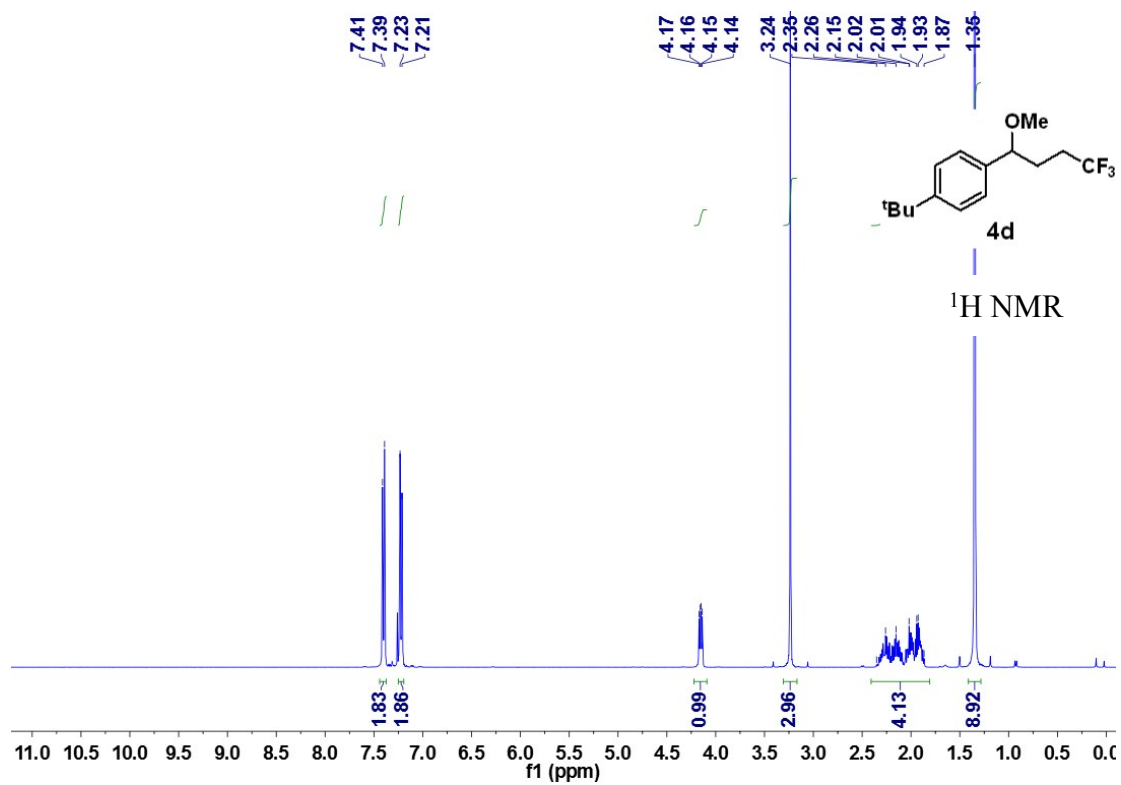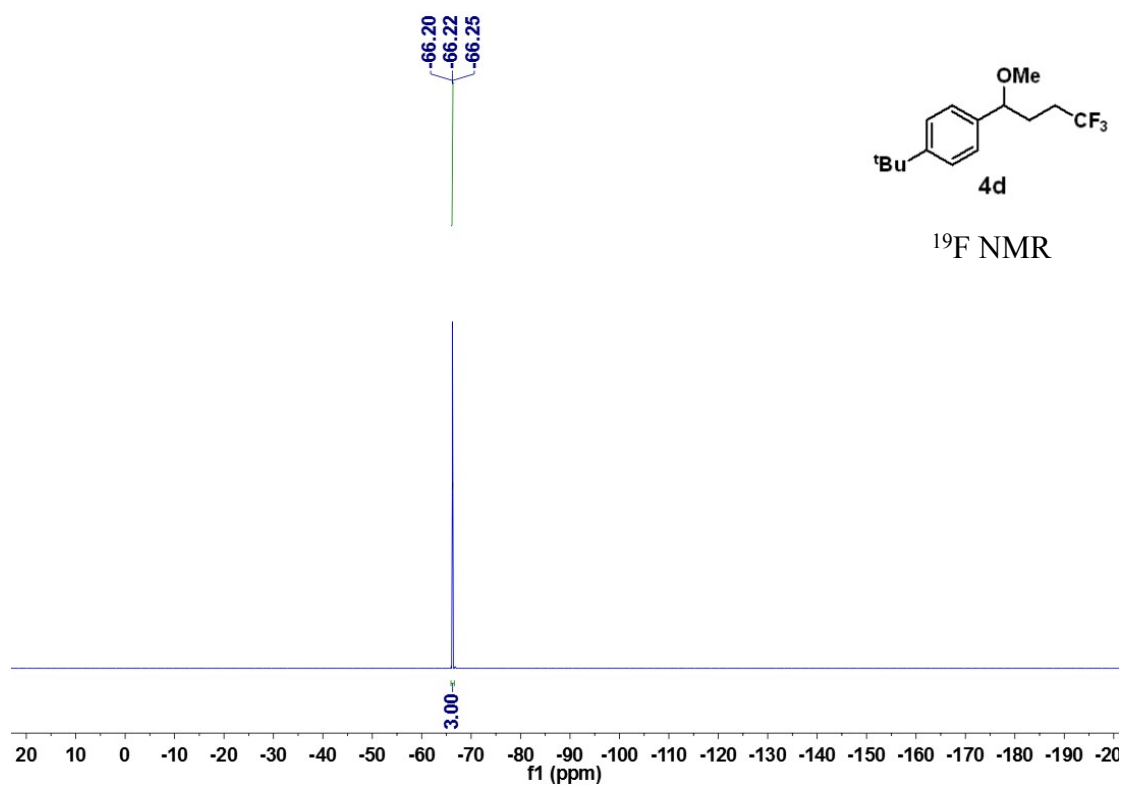

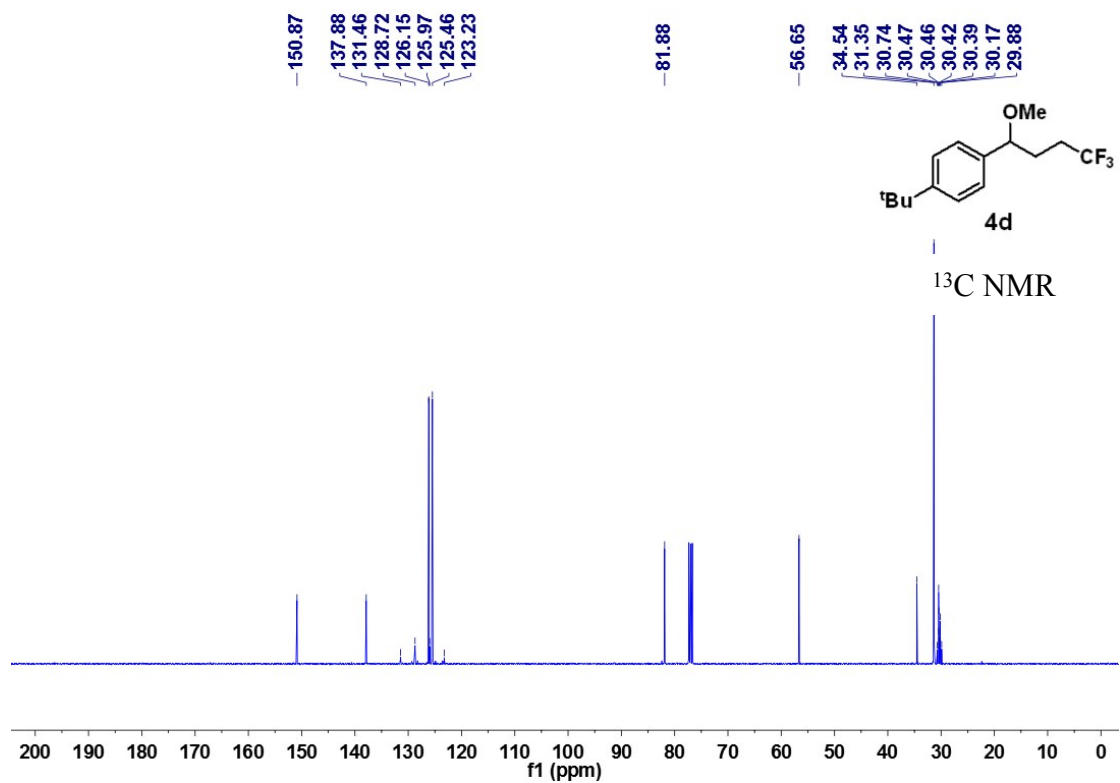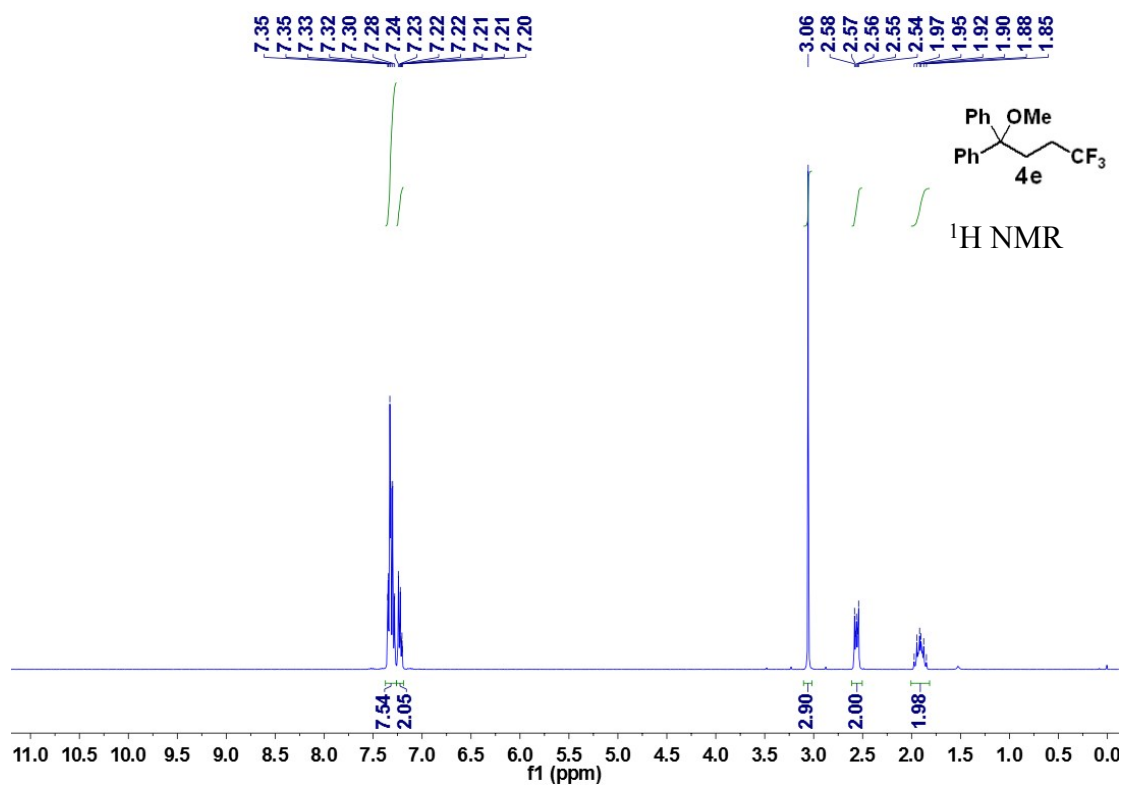

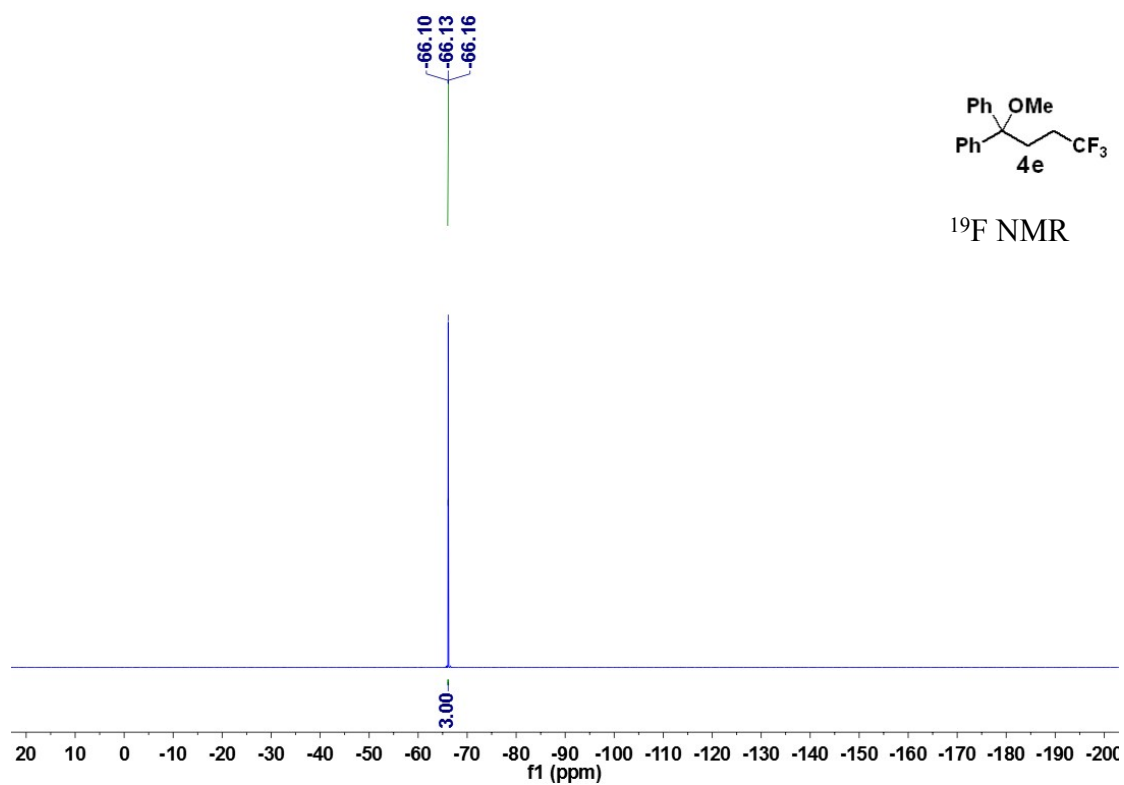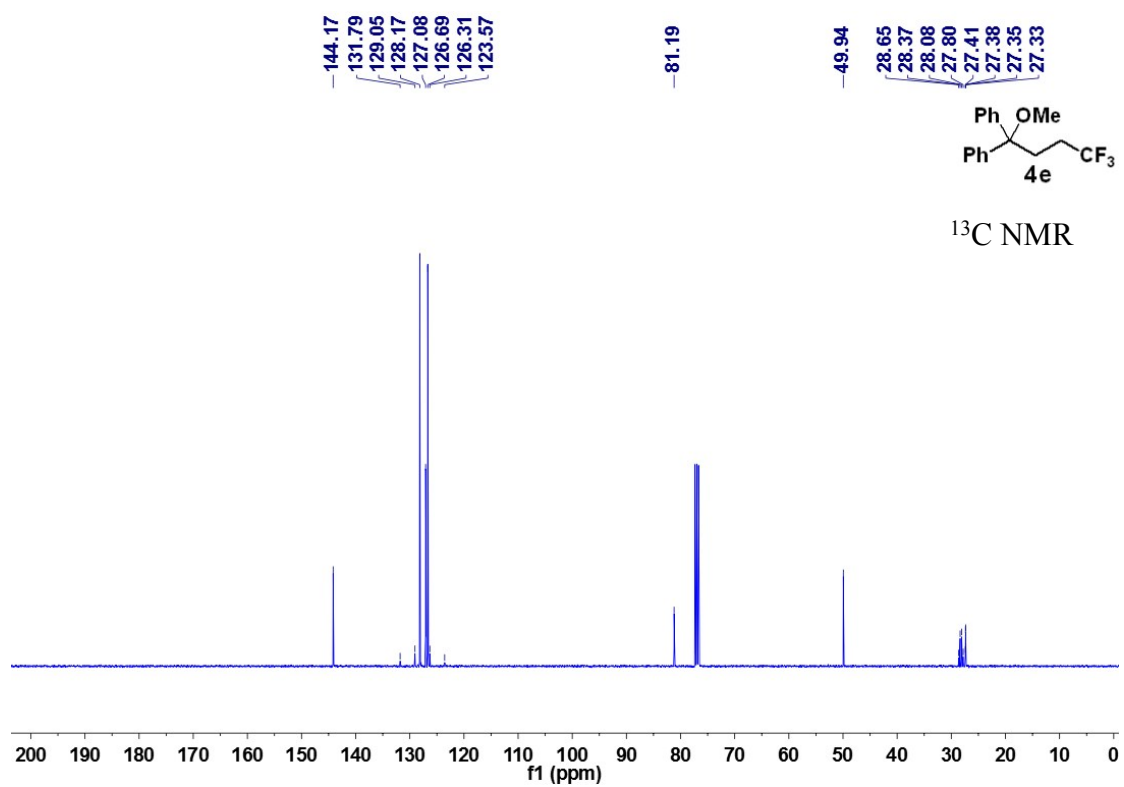

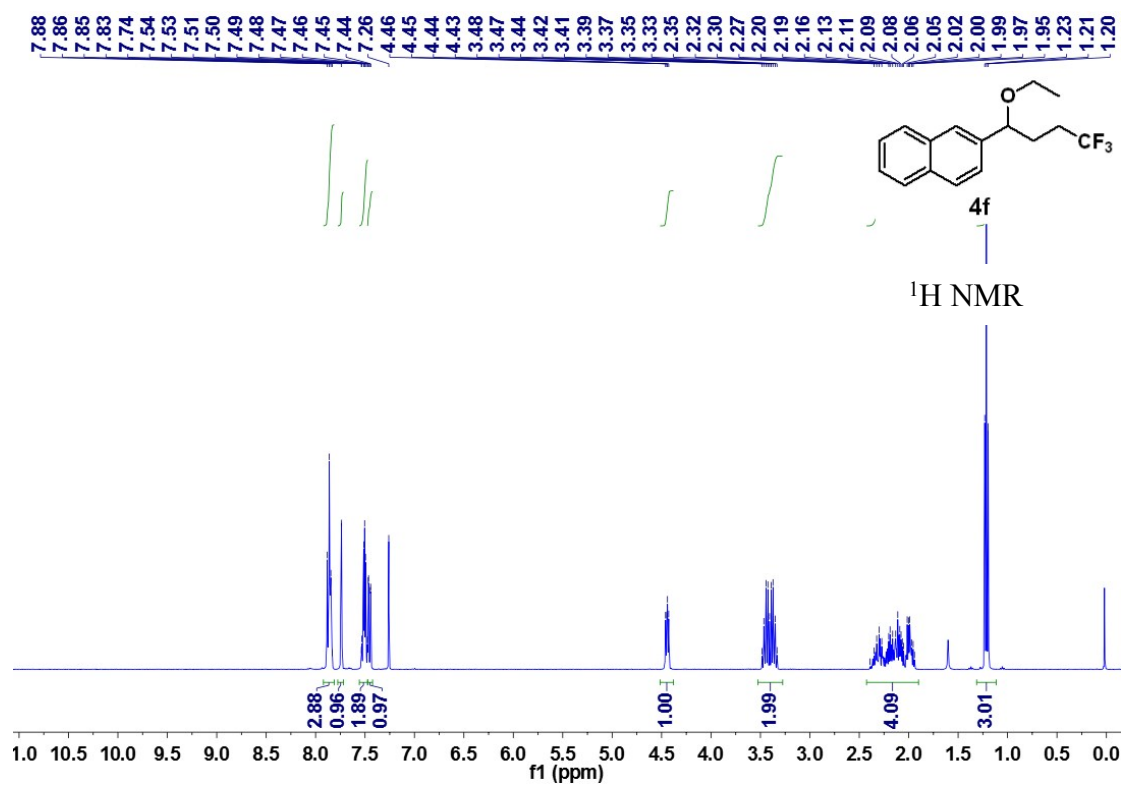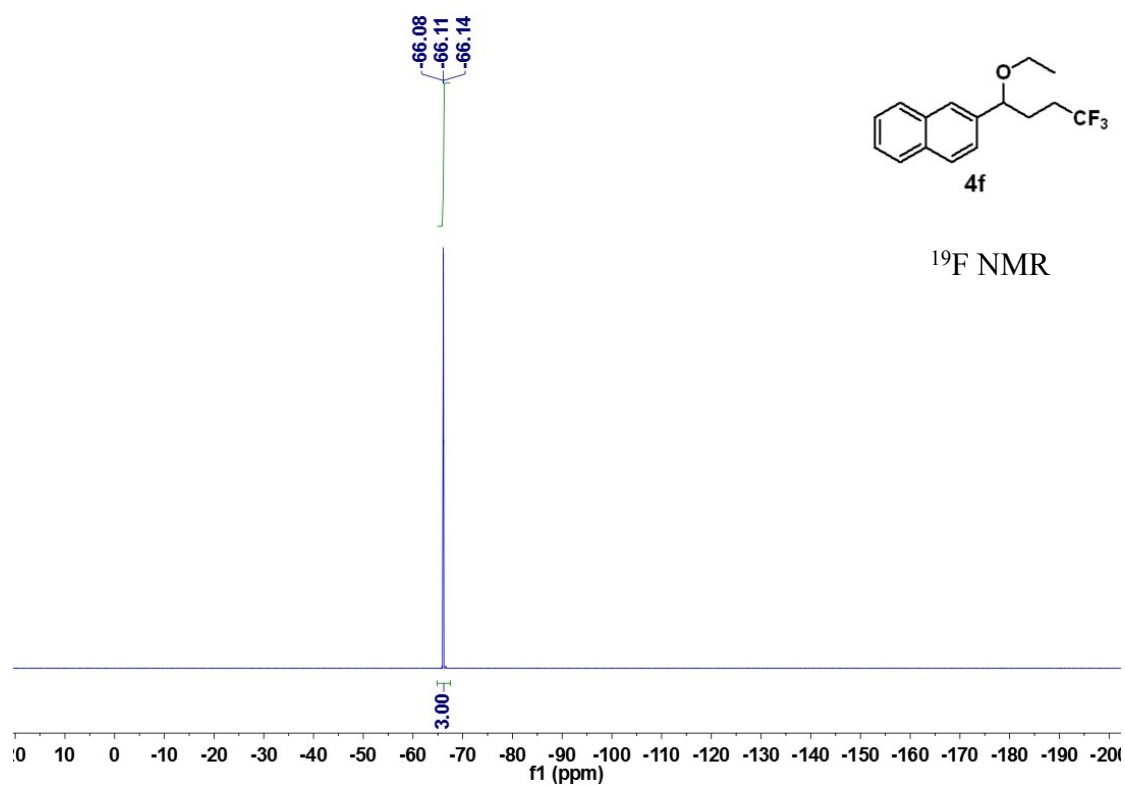

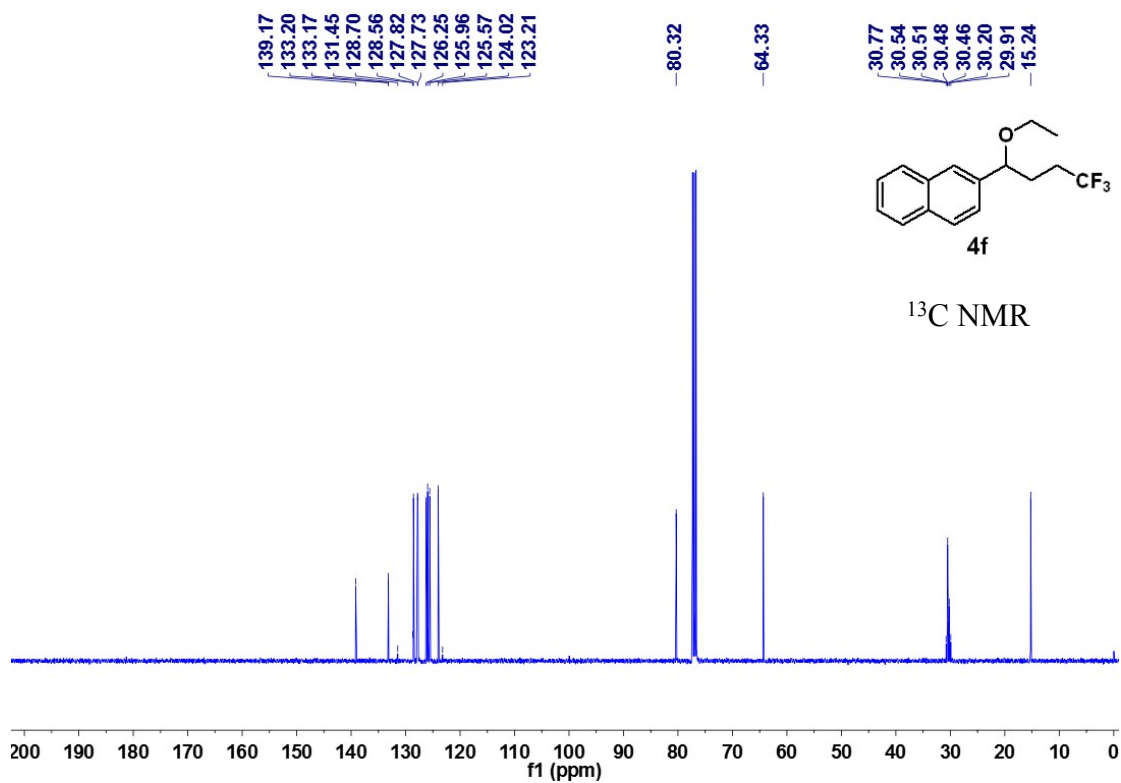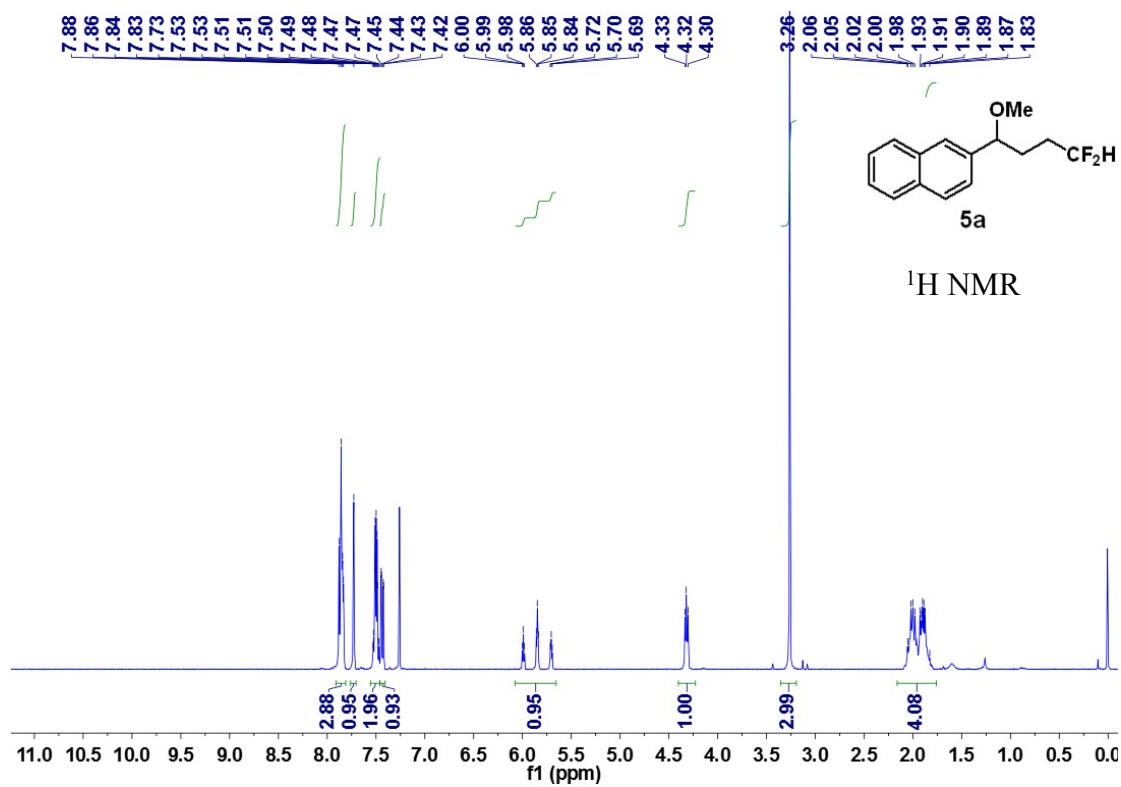

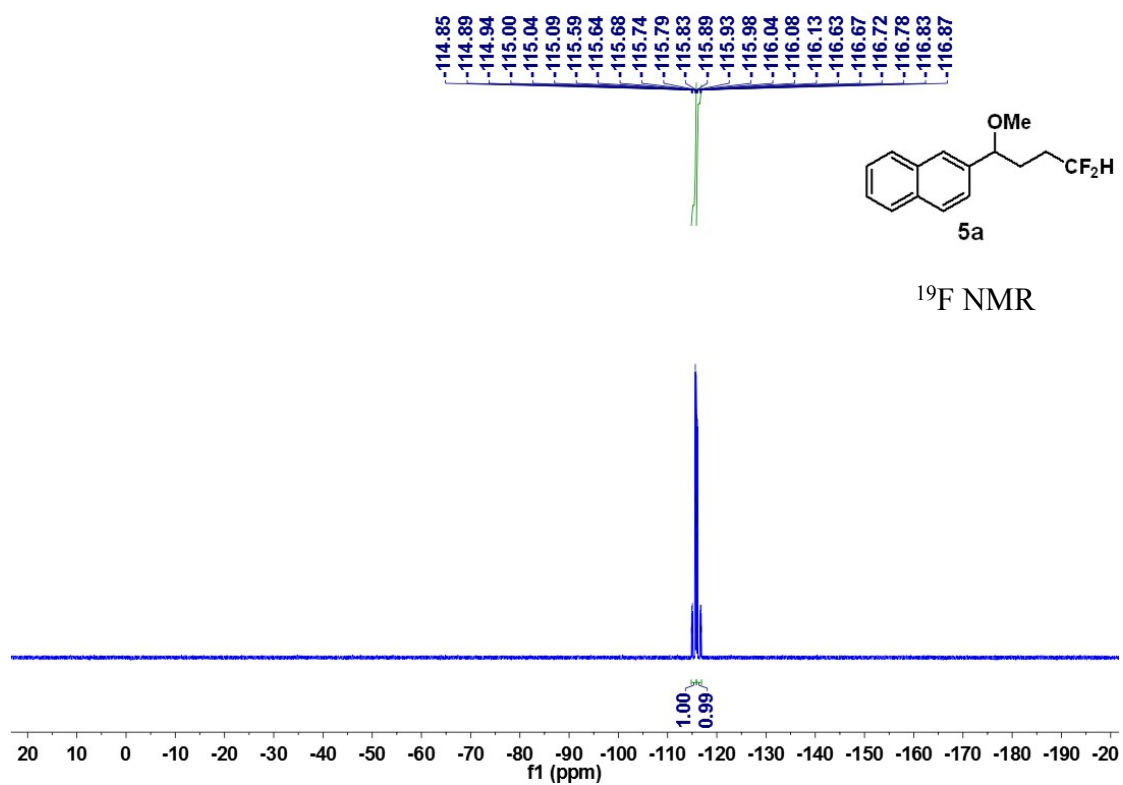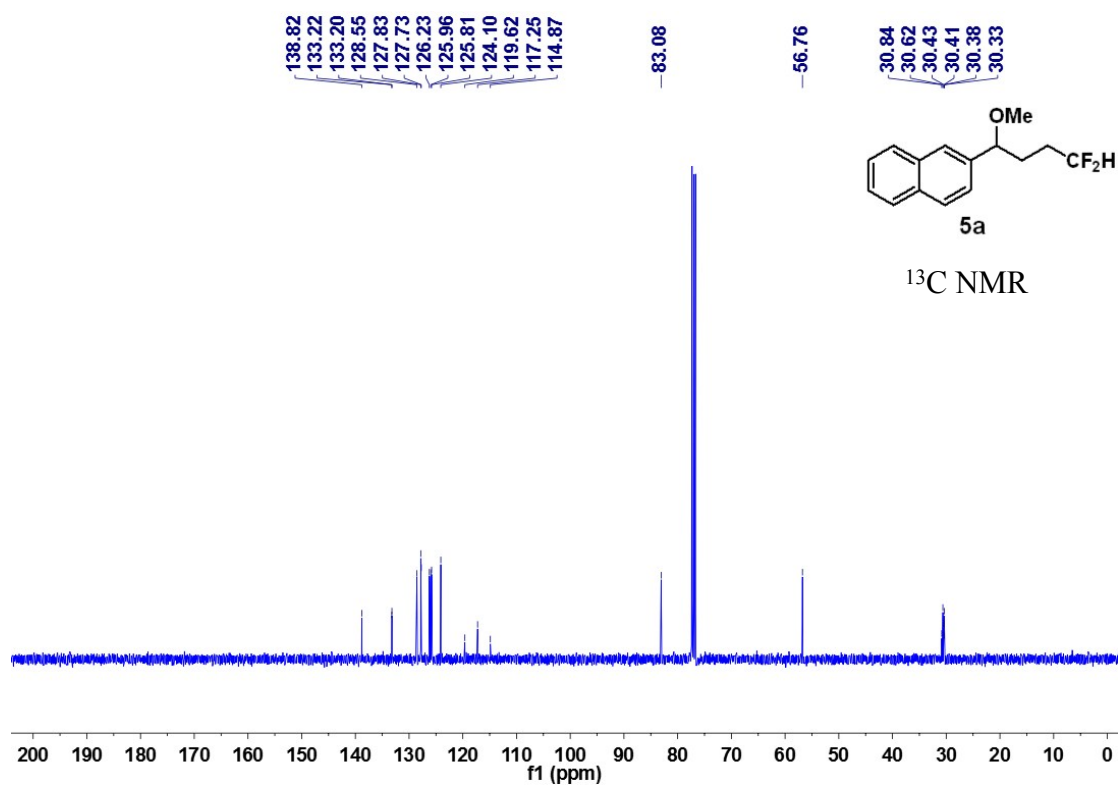

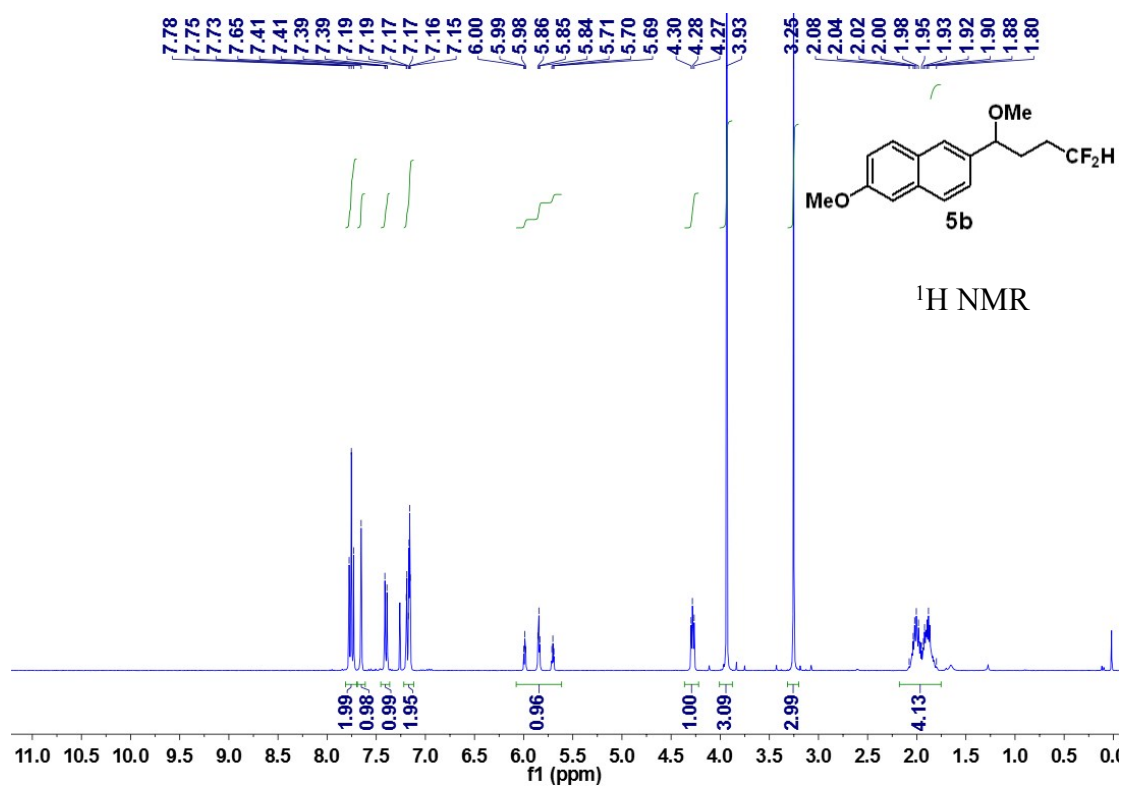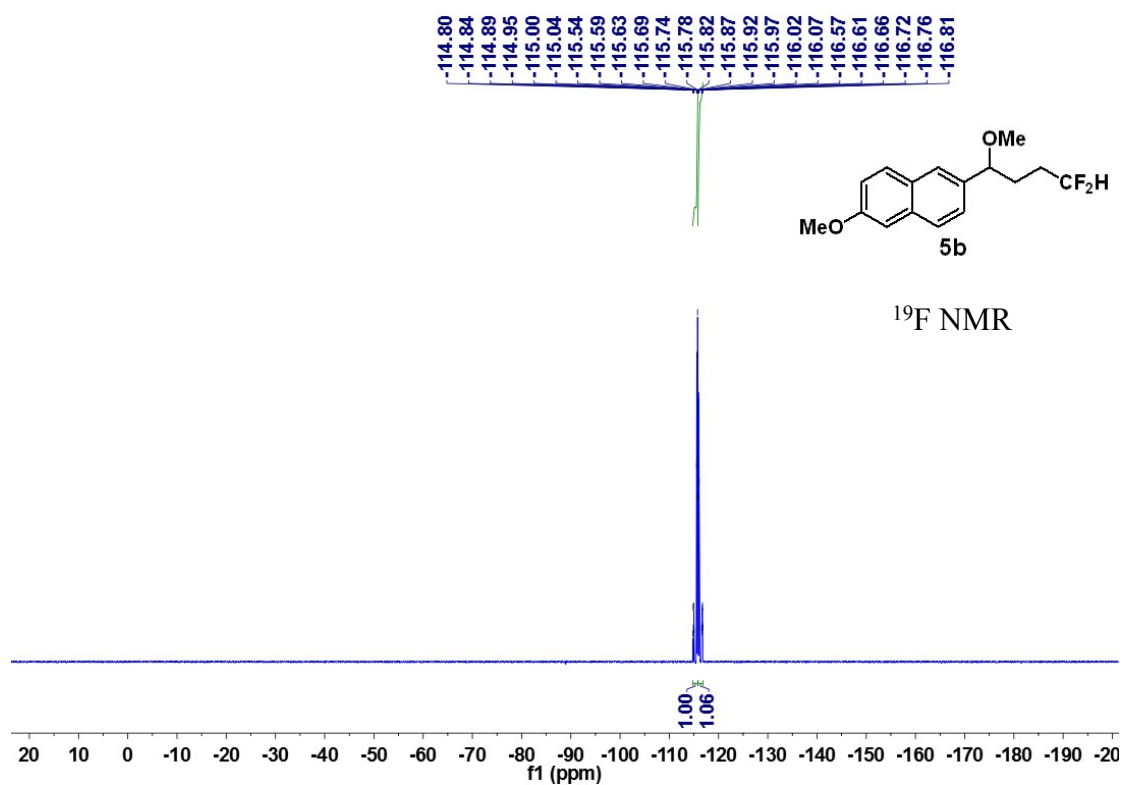

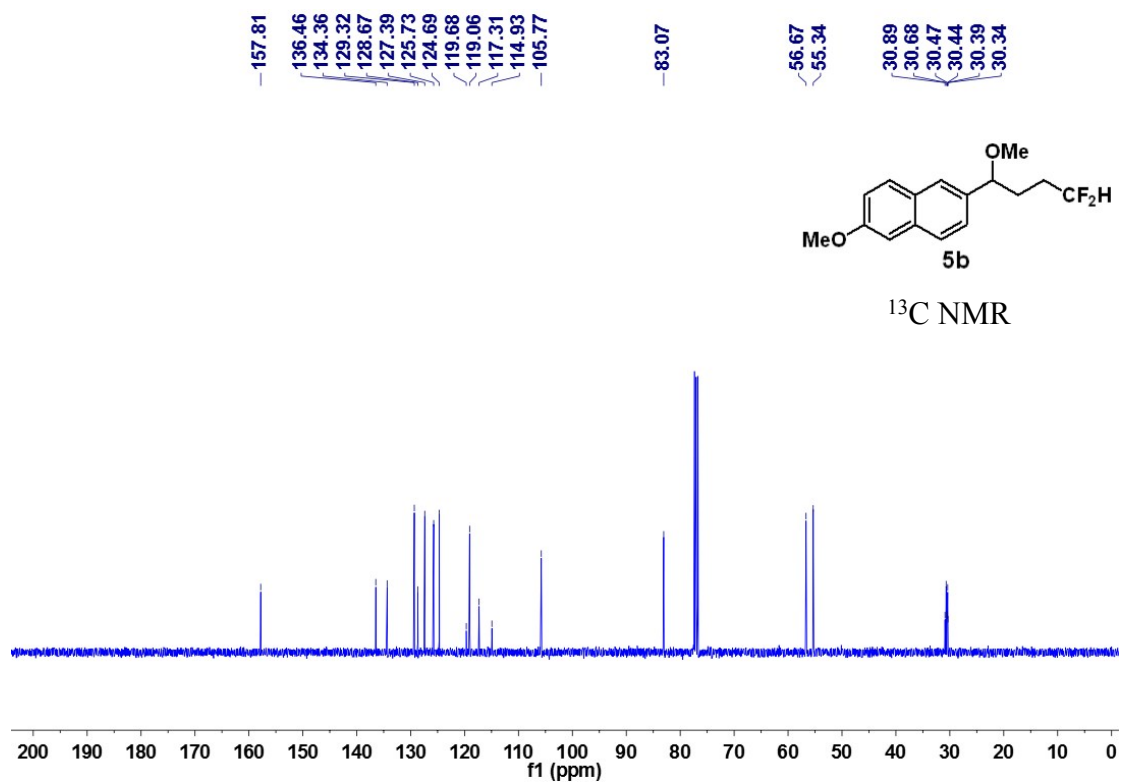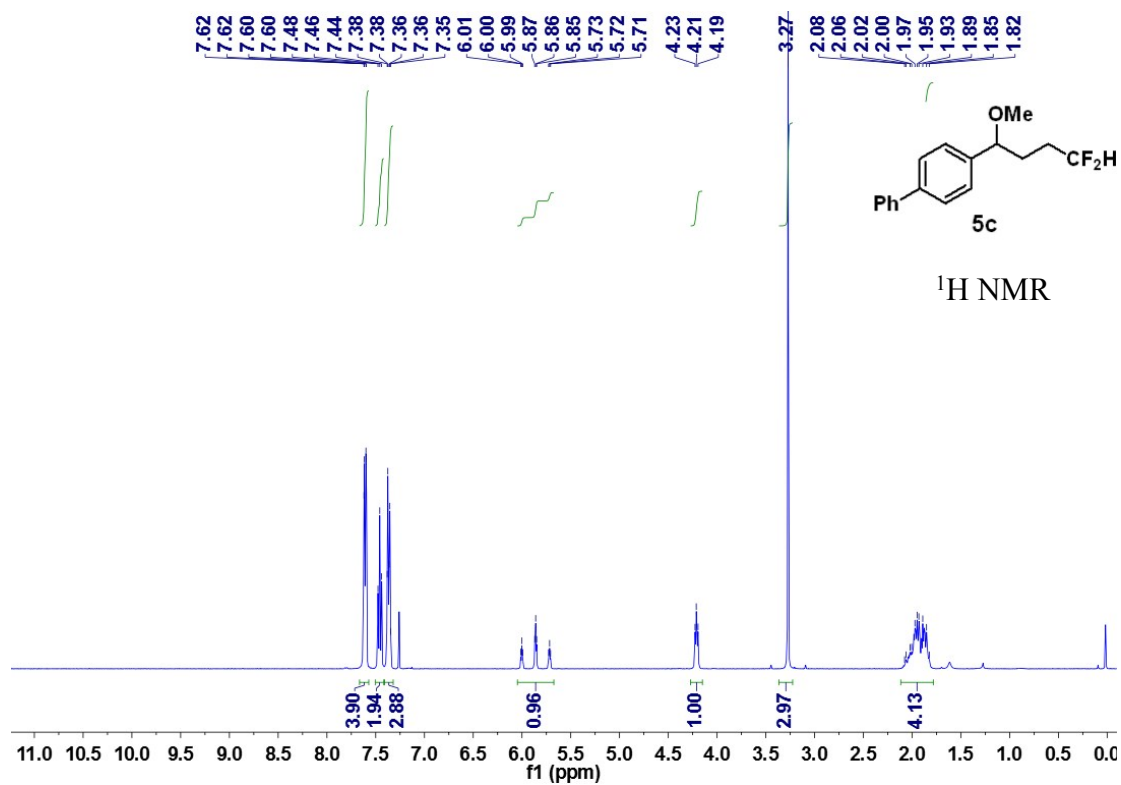

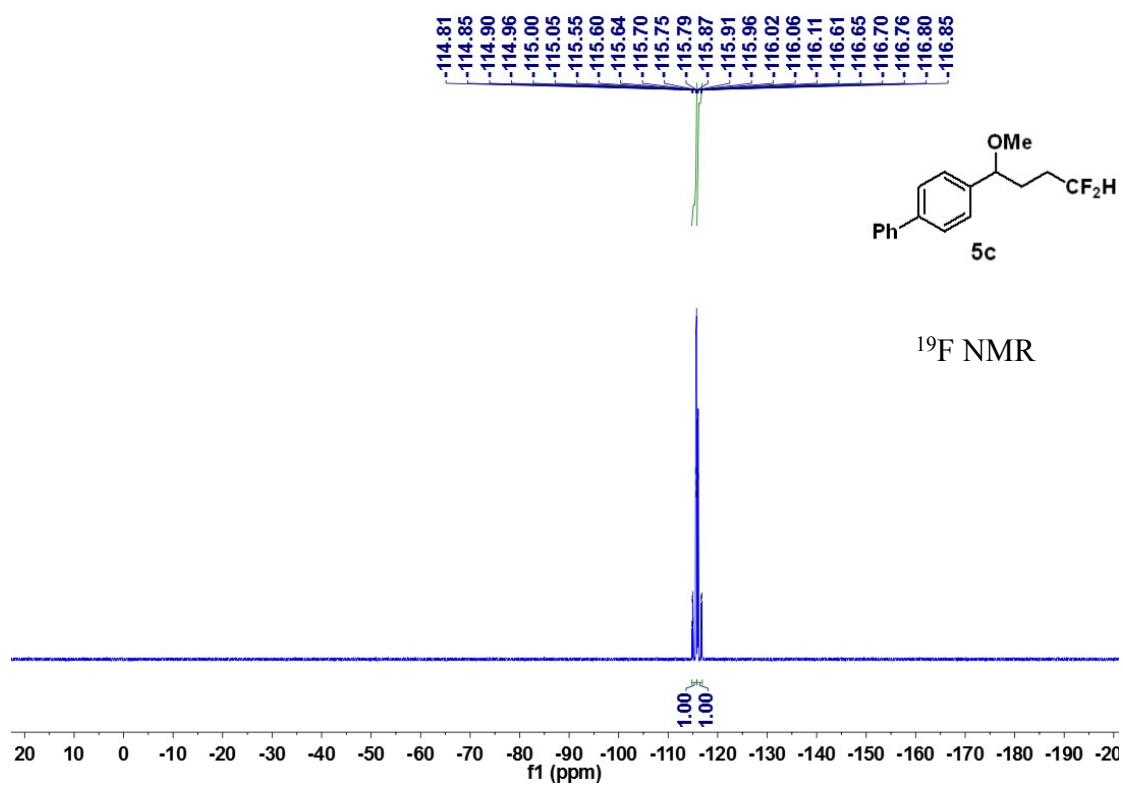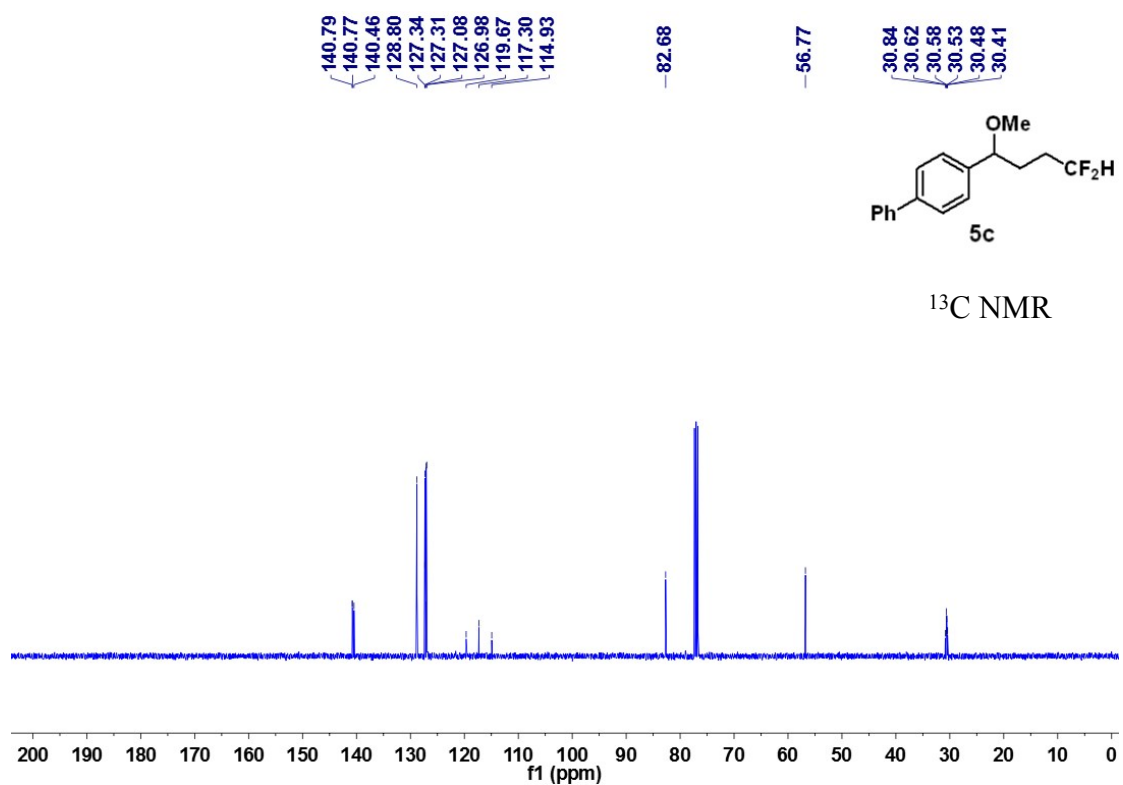

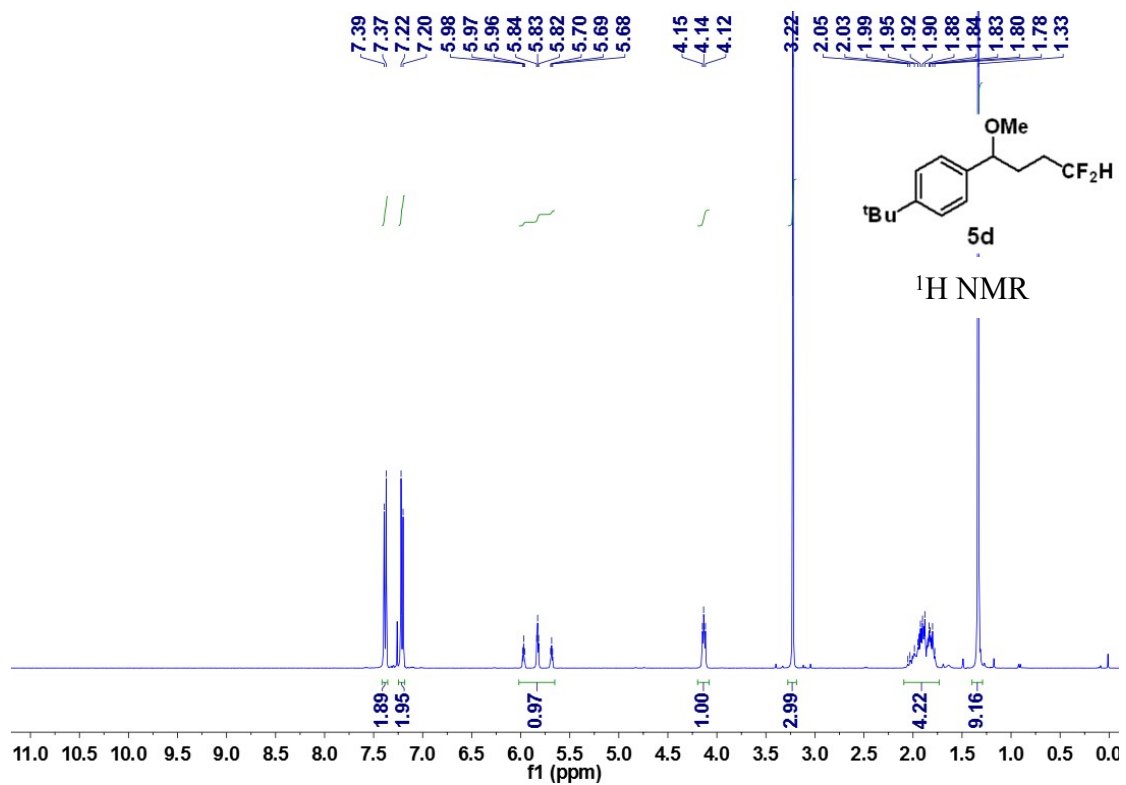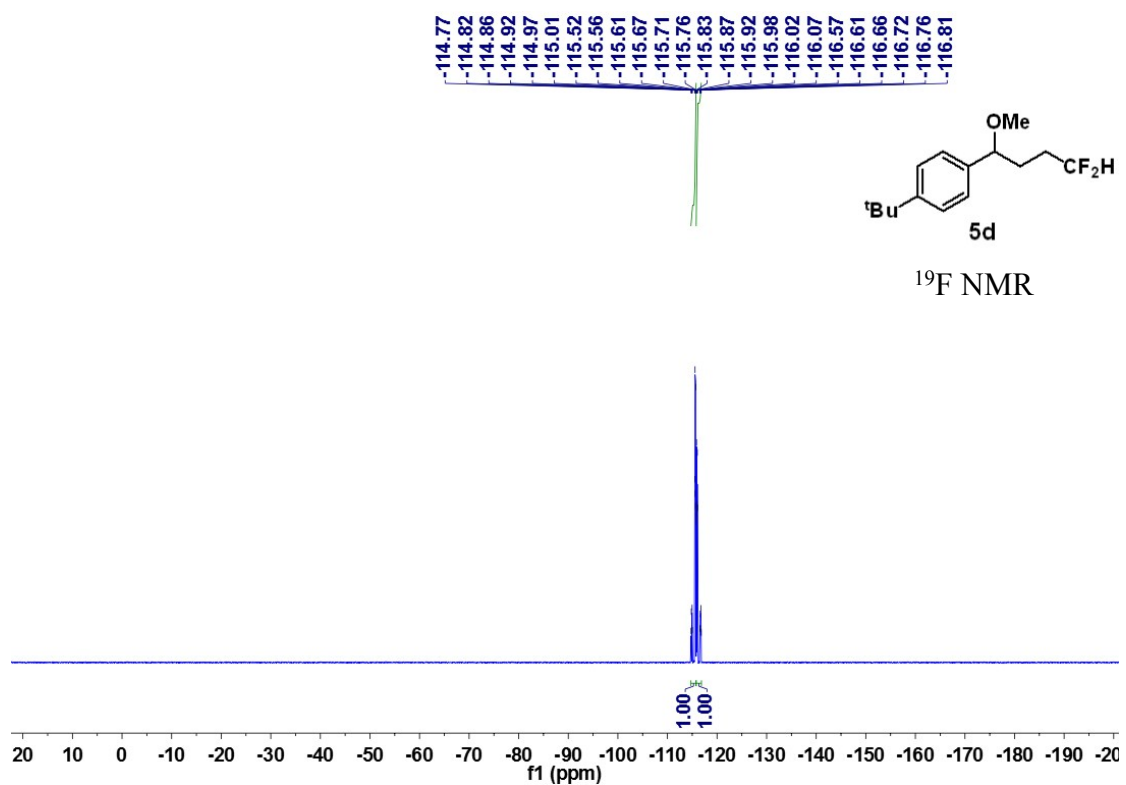

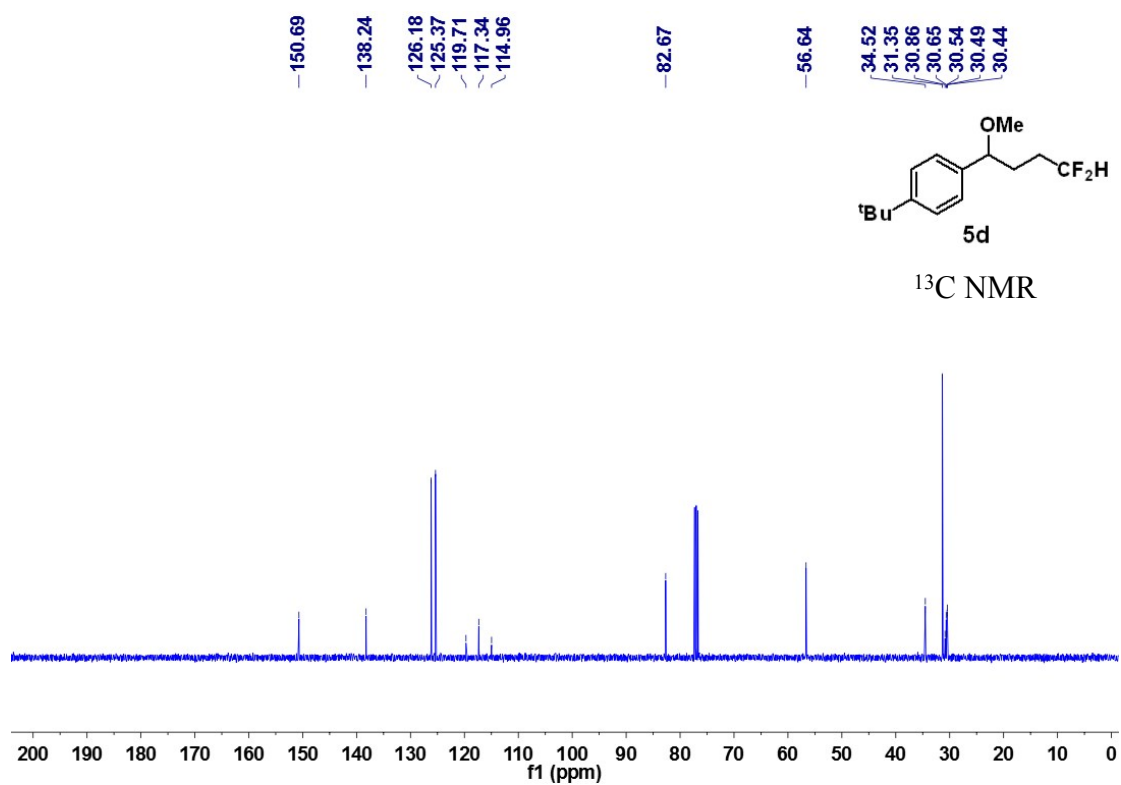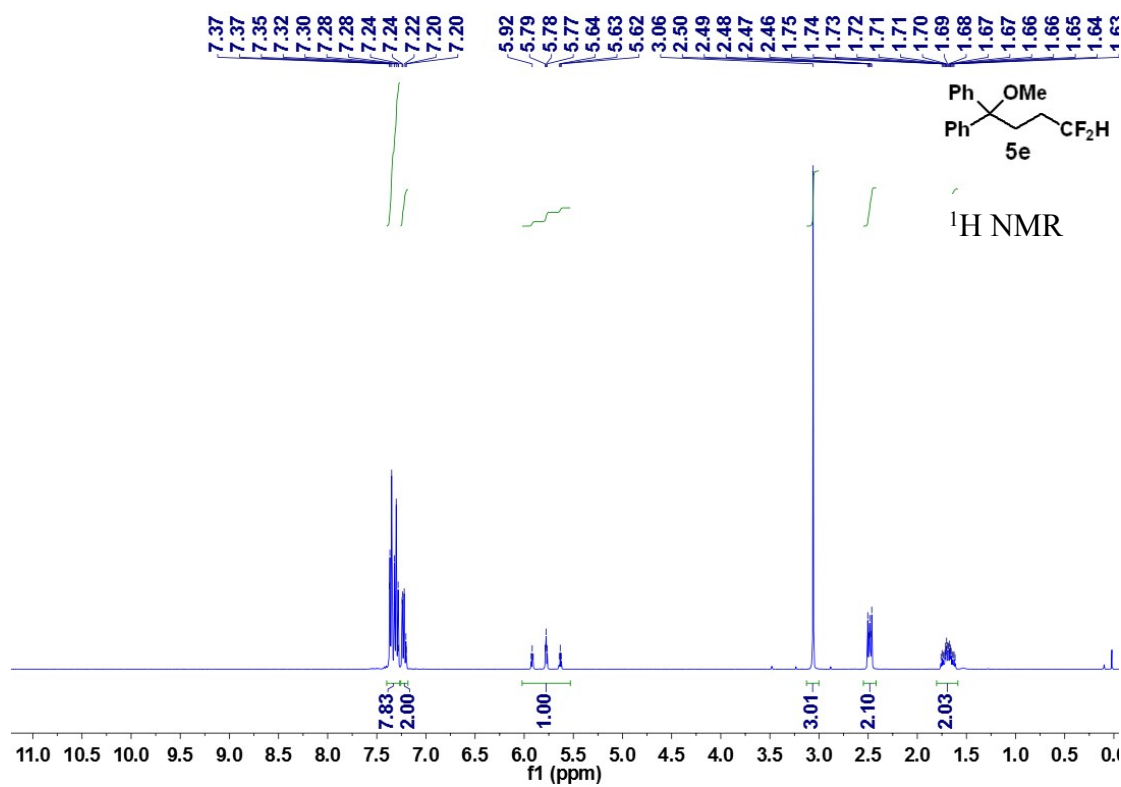

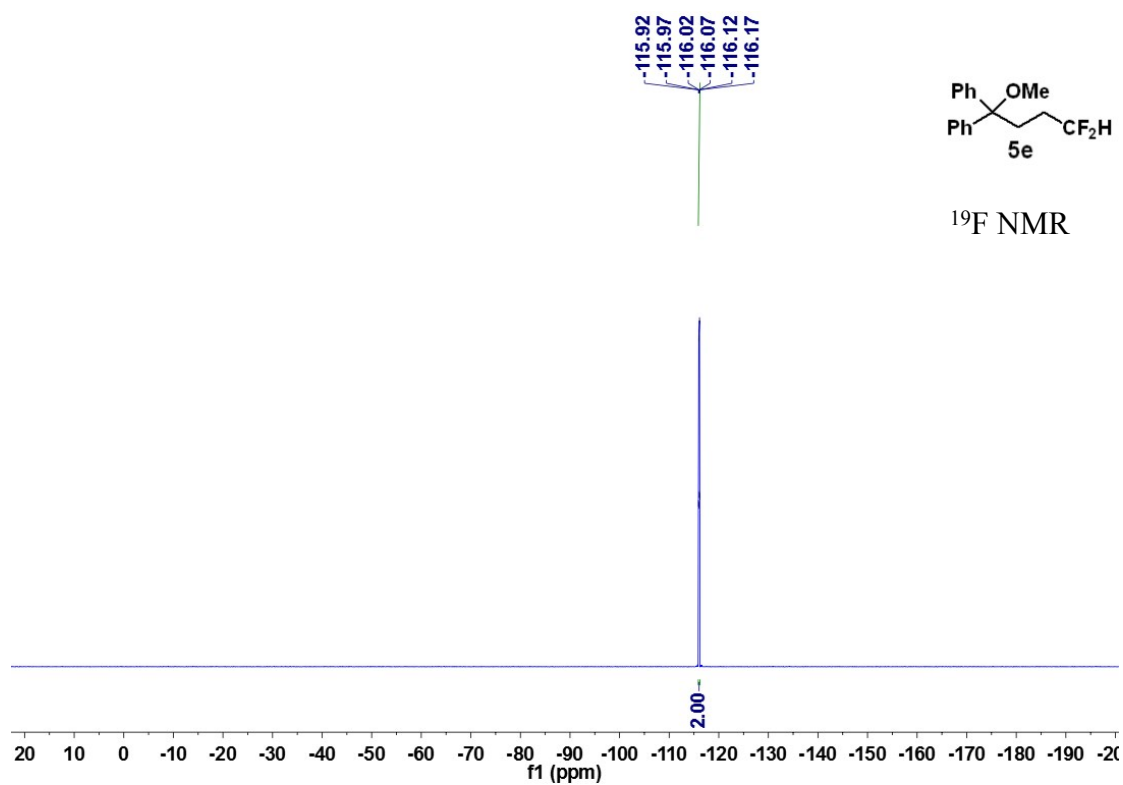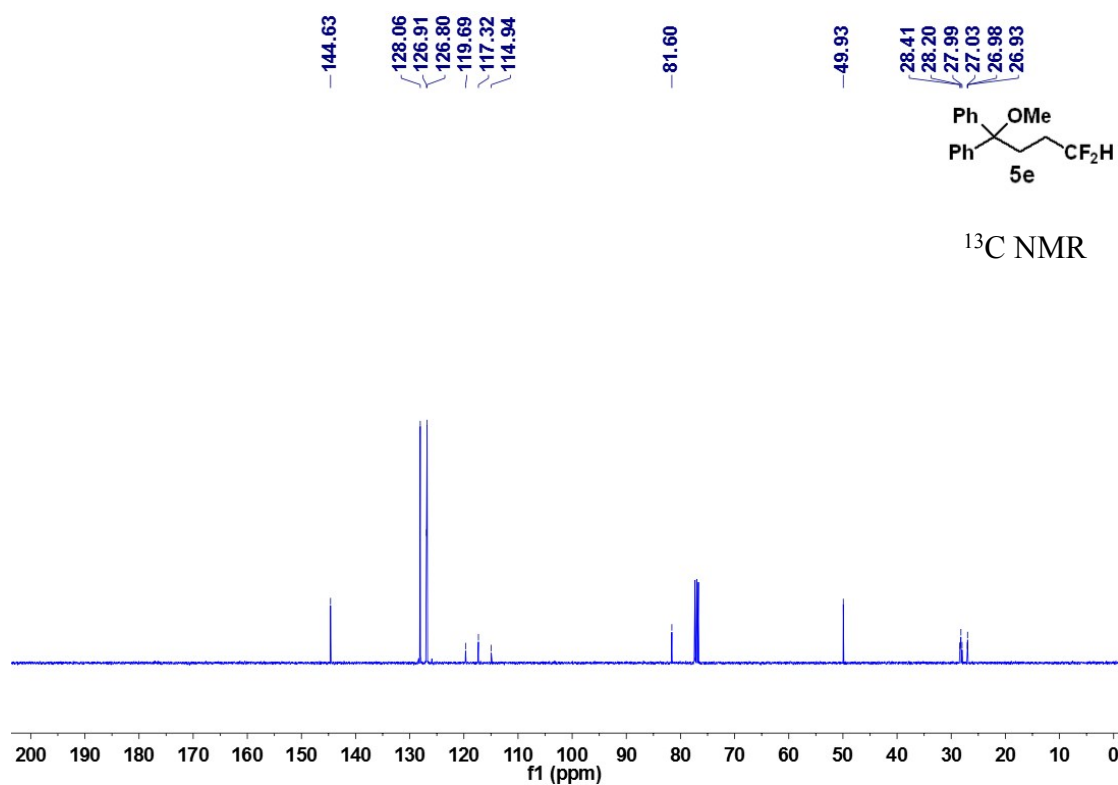

Supplement: c8qo00082d1.pdf [file c8qo00082d1.pdf]
